# Supplementary material
Source: publisher figshare collection journal article supplement (https://future-science-group.figshare.com/ndownloader/files/27866868)
Supplement: Supplementary file 1 [file 27866868]

## Sheet: TS1_Dataset sample description
Table S1. Dataset sample description
	OC				DLPFC				NeuN+
	HC	BD	p-valuea		HC	BD	p-valuea		HC	BD	p-valuea
Sociodemographic characteristics
N	14	15	NA		4	4	NA		27	26	NA
Sex (M/F)	9/5	9/6	0.812		3/1	3/1	1000		24/3	14/12	0.005
Age (years), means ± SDs	48.17 ± 10.7	42.3 ± 11.2	0.288		40.5 ± 7.2	46.0 ± 11.8	0.457		47.3 ± 9.6	48.8 ± 14.1	0.652
Lifetime alcohol useb	1.06 ± 1.03	2.80 ± 1.80	0.004		NA	NA	NA		NA	NA	NA
Lifetime drug useb	0.33 ± 0.72	0.80 ± 0.77	0.099		NA	NA	NA		NA	NA	NA
Substance abuse (never/present/past)b	11/1/2	6/6/3	0.074		NA	NA	NA		NA	NA	NA
Present tobbacco use (yes/no)b	NA	NA	NA		NA	NA	NA		9/13	19/3	0.006
Psychosis (yes/no)b	NA	11/4	NA		NA	NA	NA		NA	NA	NA
Lifetime antipsychotic expositionb	NA	20827 ± 6200	NA		NA	NA	NA		NA	NA	NA
Mood stabilizers lithium (yes/no)c	NA	NA	NA		NA	NA	NA		NA	12/14	NA
Mood stabilizers valproate (yes/no)c	NA	NA	NA		NA	NA	NA		NA	10/16	NA
Brain tissue integrity indicators
Brain pH	6.3 ± 0.2	6.2 ± 0.2	0.356		6.7 ± 0.3	6.7 ± 0.1	0.775		NA	NA	NA
PMI	23.7 ± 9.9	32.5 ± 16.1	0.315		24.2 ± 2.6	33.0 ± 18.0	0.686		18.4 ± 5.9	17.6 ± 7.1	0.666
Experimental profiling methods
DNA methylation	Illumina Infinium MethylationEPIC				Illumina HumanMethylation27 v.1.2				Illumina Infinium MethylationEPIC
Gene expression	Custom TaqMan® assay (Applied Biosystems)				Affymetrix Human Genome U133 Plus 2.0				Illumina NextSeq® 500 System
at-test and Mann-Whitney tests for normal and nonnormally distributed variables, respectively, and χ2 test to compare the frequencies of categorical variables.
Abbreviations: DLPFC: Dorsolateral prefrontal cortex; NA: Not applicable; NeuN+: Neuronal nuclei; OC: Occipital cortex; PMI: Postmortem interval; SD: Standard deviation.
bAccording to Torrey EF et al. 2000
cAccording to Pai S et al. 2019

## Sheet: TS2_Geneset selected
Table S2. Selected myelin, astrocyte, microglia and neuron gene markers
Gene symbol	Gene name	Chr.	Genomic location (GRCh38/hg38)	Genomic location (GRCh37/hg19)	Cell type marker
CNP	2',3'-Cyclic Nucleotide 3' Phosphodiesterase	17	41,966,741-41,977,740	40,118,759-40,129,754	Myelin
CSPG4	Chondroitin Sulfate Proteoglycan 4	15	75,674,322-75,712,848	75,966,663-76,005,189	Myelin
GALC	Galactosylceramidase	14	87,837,820-87,993,665	88,304,164-88,460,009	Myelin
MAG	Myelin Associated Glycoprotein	19	35,292,086-35,313,807	35,782,989-35,804,710	Myelin
MBP	Myelin Basic Protein	18	76,978,827-77,133,708	74,690,783-74,845,639	Myelin
OLIG1	OligodendrocyteTranscription Factor 1	21	33,070,141-33,072,422	34,442,450-34,444,728	Myelin
OLIG2	OligodendrocyteTranscription Factor 2	21	33,025,908-33,029,196	34,398,153-34,401,504	Myelin
PDGFRA	Platelet-Derived Growth Factor Receptor Alpha	4	54,229,097-54,298,245	55,095,264-55,164,414	Myelin
SOX10	SRY-Box Transcription Factor 10	22	37,970,686-37,987,422	38,366,693-38,383,429	Myelin
GFAP	Glial FibrillaryAcidicProtein	17	44,903,159-44,916,937	42,982,376-42,994,305	Astrocyte
CX3CL1	C-X3-C Motif Chemokine Ligand 1	16	57,372,461-57,385,048	57,406,370-57,418,960	Microglia
MAP2	Microtubule-Associated Protein 2	2	209,424,047-209,734,118	210,288,771-210,598,842	Neuron
MAPT	Microtubule-Associated Protein Tau	17	45,894,382-46,028,334	43,971,748-44,105,700	Neuron
PVALB	Parvalbumin	22	36,800,684-36,819,479	37,196,728-37,215,523	Neuron

## Sheet: TS3_EDec_marker_ovr list
Table S3. 500 selected marker loci (marker_ovra) by EDec stage 0
Number loci	CpG
1	cg26662324
2	cg08750440
3	cg18222083
4	cg06683719
5	cg22471112
6	cg02069524
7	cg13146674
8	cg06255601
9	cg21671658
10	cg03556243
11	cg18454133
12	cg06815411
13	cg22809856
14	cg11423206
15	cg21514164
16	cg18957751
17	cg07153588
18	cg09671951
19	cg22511413
20	cg15405572
21	cg00968638
22	cg09803321
23	cg09000385
24	cg18215449
25	cg11225090
26	cg25283465
27	cg22481960
28	cg16895672
29	cg03779374
30	cg15910502
31	cg10553890
32	cg24008544
33	cg12192749
34	cg20438687
35	cg09750084
36	cg12439977
37	cg13608733
38	cg20483374
39	cg17427639
40	cg17176609
41	cg26930816
42	cg14213590
43	cg07962143
44	cg18832140
45	cg00808305
46	cg13437525
47	cg27405988
48	cg13767001
49	cg05032848
50	cg02515422
51	cg04990202
52	cg17656763
53	cg05033239
54	cg04564000
55	cg27661846
56	cg05401447
57	cg21037265
58	cg17531849
59	cg03781098
60	cg04115680
61	cg16286735
62	cg22437153
63	cg15026277
64	cg17886420
65	cg03655701
66	cg08220149
67	cg15096829
68	cg24757533
69	cg00460983
70	cg24940138
71	cg08647349
72	cg12829325
73	cg06930722
74	cg21211480
75	cg24375409
76	cg10470891
77	cg20918393
78	cg17966560
79	cg00414166
80	cg24166450
81	cg13029400
82	cg17684207
83	cg21297493
84	cg12646786
85	cg05940691
86	cg01462184
87	cg09998451
88	cg01553231
89	cg22155376
90	cg12033075
91	cg15597480
92	cg06413196
93	cg05402634
94	cg02591564
95	cg15320905
96	cg05003723
97	cg07592809
98	cg07055259
99	cg13470557
100	cg07197585
101	cg05230834
102	cg20229025
103	cg18041123
104	cg01963754
105	cg21130463
106	cg04404310
107	cg19118904
108	cg00256675
109	cg22686523
110	cg21396630
111	cg13276570
112	cg01523712
113	cg04571522
114	cg24445388
115	cg02490942
116	cg26814635
117	cg11068784
118	cg18242139
119	cg12093060
120	cg02760280
121	cg27308218
122	cg07233230
123	cg18456456
124	cg04347414
125	cg11093142
126	cg00795927
127	cg08203192
128	cg15624160
129	cg07753525
130	cg20445094
131	cg20659057
132	cg10677372
133	cg26101086
134	cg14669524
135	cg10787000
136	cg06968674
137	cg21598117
138	cg05409391
139	cg18776945
140	cg14755417
141	cg01694276
142	cg27205902
143	cg14470792
144	cg10659480
145	cg02554051
146	cg01923516
147	cg22938135
148	cg13021479
149	cg19658522
150	cg22086566
151	cg04228083
152	cg26190686
153	cg21529164
154	cg25670583
155	cg05194636
156	cg20553577
157	cg08149865
158	cg06603561
159	cg21551979
160	cg03966955
161	cg06984201
162	cg13909661
163	cg23401796
164	cg04194055
165	cg01307776
166	cg14089832
167	cg24093182
168	cg03773862
169	cg00857862
170	cg01344644
171	cg26284735
172	cg11868461
173	cg01751245
174	cg26606551
175	cg12842791
176	cg22094781
177	cg24736734
178	cg06433467
179	cg10911054
180	cg00409696
181	cg08467103
182	cg07340025
183	cg10808934
184	cg20358011
185	cg08998950
186	cg04236915
187	cg23841186
188	cg16596440
189	cg09371112
190	cg11827514
191	cg04942791
192	cg25508319
193	cg26126295
194	cg09884146
195	cg10113526
196	cg02272851
197	cg11012153
198	cg09372525
199	cg27149179
200	cg06545268
201	cg23138413
202	cg07006935
203	cg21425296
204	cg02458188
205	cg07301044
206	cg26721759
207	cg04470054
208	cg01135165
209	cg03024720
210	cg16320427
211	cg13056990
212	cg12217954
213	cg27484412
214	cg22679813
215	cg24312105
216	cg00004700
217	cg05474726
218	cg25633678
219	cg03789372
220	cg00362657
221	cg14345676
222	cg26335577
223	cg17943672
224	cg17526103
225	cg16464373
226	cg19807286
227	cg24022152
228	cg02226645
229	cg00768487
230	cg14931884
231	cg03935060
232	cg08030922
233	cg11555420
234	cg01517740
235	cg23501051
236	cg04104463
237	cg24587185
238	cg16281600
239	cg06889535
240	cg07581070
241	cg02077216
242	cg25900085
243	cg23028740
244	cg17510385
245	cg24107728
246	cg03611487
247	cg23305899
248	cg23068558
249	cg04362790
250	cg11235594
251	cg00288598
252	cg05403655
253	cg19860734
254	cg01898377
255	cg11763830
256	cg03202732
257	cg04179740
258	cg13962347
259	cg16162970
260	cg01128736
261	cg06526980
262	cg21205978
263	cg16528895
264	cg03516335
265	cg09365147
266	cg13496662
267	cg27570256
268	cg16614527
269	cg10760299
270	cg02000275
271	cg16699540
272	cg20388732
273	cg14484885
274	cg14546128
275	cg18920088
276	cg13475995
277	cg14802771
278	cg18184053
279	cg08594554
280	cg19552640
281	cg15384589
282	cg15300753
283	cg00710180
284	cg20494738
285	cg00251716
286	cg10321156
287	cg27309098
288	cg11911305
289	cg02872426
290	cg02284297
291	cg14672084
292	cg10896586
293	cg04942251
294	cg09327586
295	cg25412448
296	cg26573923
297	cg06454084
298	cg10948630
299	cg12608692
300	cg01112778
301	cg25436634
302	cg05037389
303	cg18749563
304	cg08569979
305	cg20654468
306	cg12754495
307	cg16274899
308	cg05711023
309	cg11804725
310	cg08906015
311	cg24624505
312	cg26952803
313	cg09462089
314	cg07152925
315	cg14689338
316	cg06100756
317	cg26165081
318	cg15035590
319	cg21860045
320	cg22373519
321	cg04421271
322	cg12651286
323	cg06154903
324	cg10772263
325	cg18574274
326	cg01657761
327	cg17369406
328	cg01309726
329	cg26064794
330	cg03952520
331	cg06388363
332	cg15656501
333	cg19187110
334	cg16809457
335	cg12491643
336	cg05766064
337	cg01842321
338	cg14414203
339	cg18088587
340	cg15154339
341	cg18617669
342	cg25824218
343	cg13705674
344	cg11864201
345	cg16927285
346	cg04850059
347	cg14418582
348	cg08832723
349	cg14197892
350	cg01703355
351	cg01134758
352	cg09729395
353	cg21434376
354	cg07295003
355	cg23915679
356	cg13603805
357	cg05945030
358	cg25983629
359	cg19252369
360	cg17025459
361	cg05941641
362	cg23906001
363	cg18400181
364	cg17517997
365	cg01120369
366	cg27100547
367	cg13151811
368	cg10383447
369	cg20480899
370	cg06893379
371	cg18890825
372	cg05870398
373	cg26205216
374	cg06354692
375	cg18856501
376	cg11771735
377	cg15304425
378	cg00758881
379	cg24162959
380	cg10674754
381	cg07301508
382	cg02430732
383	cg17095958
384	cg09800974
385	cg06420512
386	cg03109729
387	cg08633881
388	cg00144425
389	cg03352153
390	cg21236414
391	cg27251686
392	cg06286604
393	cg19647607
394	cg18207099
395	cg19444998
396	cg02679662
397	cg19760666
398	cg23544472
399	cg08609400
400	cg06295071
401	cg13898166
402	cg16496814
403	cg02057688
404	cg24246360
405	cg04434909
406	cg13495918
407	cg05888551
408	cg02753404
409	cg24469152
410	cg19322825
411	cg19431009
412	cg09259182
413	cg12749468
414	cg26312950
415	cg12260801
416	cg23950714
417	cg07768103
418	cg16451525
419	cg20293609
420	cg17107691
421	cg09550697
422	cg15028458
423	cg09026722
424	cg19640303
425	cg10965178
426	cg19232929
427	cg10823804
428	cg04059762
429	cg09365002
430	cg09476092
431	cg03582419
432	cg02286008
433	cg13208899
434	cg14839087
435	cg08959039
436	cg03306486
437	cg13024471
438	cg26796518
439	cg13501446
440	cg09791621
441	cg24028634
442	cg24773770
443	cg04339692
444	cg05106892
445	cg17746570
446	cg10511890
447	cg07139509
448	cg05971592
449	cg01973676
450	cg27366766
451	cg27260080
452	cg06943912
453	cg14361672
454	cg18196829
455	cg19108747
456	cg04709736
457	cg17534029
458	cg16217297
459	cg17826530
460	cg13436110
461	cg07639376
462	cg07420137
463	cg16959787
464	cg10615591
465	cg15972148
466	cg04873098
467	cg25739366
468	cg24018174
469	cg17362483
470	cg22391718
471	cg00009750
472	cg05740262
473	cg05124021
474	cg03827835
475	cg08356028
476	cg27450668
477	cg00524561
478	cg06866451
479	cg01471232
480	cg18520125
481	cg08244518
482	cg17412901
483	cg25623473
484	cg19333963
485	cg18633230
486	cg00871207
487	cg07573872
488	cg03155200
489	cg23928126
490	cg01312394
491	cg07754940
492	cg08418670
493	cg17126924
494	cg03033182
495	cg06878548
496	cg10207553
497	cg03065175
498	cg17540192
499	cg08094614
500	cg14518185
aSelected loci that define cell type identity based on T-test comparations of each reference class against all other samples.
Abbreviations: EDec: Epigenomic deconvolution method; OC: Occipital cortex.

## Sheet: TS4_EDec_marker_ep list
Table S4. 500 selected marker loci (marker_epa) by EDec stage 0
Number loci	CpG
1	cg21297493
2	cg23350336
3	cg26607828
4	cg23201549
5	cg12927498
6	cg26284390
7	cg24843443
8	cg09301222
9	cg18215449
10	cg06383124
11	cg20107759
12	cg22105332
13	cg09365147
14	cg09225230
15	cg14217558
16	cg24757533
17	cg05999245
18	cg26444623
19	cg13029400
20	cg12646786
21	cg24065770
22	cg07427605
23	cg14914220
24	cg15346168
25	cg13792579
26	cg27539986
27	cg26090652
28	cg09671951
29	cg18880897
30	cg27376136
31	cg22481960
32	cg06930722
33	cg17321883
34	cg03779374
35	cg08663159
36	cg25076767
37	cg01867433
38	cg24064264
39	cg00162231
40	cg00159523
41	cg24180402
42	cg27043630
43	cg09939831
44	cg19954537
45	cg17298239
46	cg04850765
47	cg19383430
48	cg06815411
49	cg13146674
50	cg12829325
51	cg18201077
52	cg17684207
53	cg08988364
54	cg20554488
55	cg07382923
56	cg01566127
57	cg07966140
58	cg09159285
59	cg12794421
60	cg23864632
61	cg12542255
62	cg00261781
63	cg20814026
64	cg09689449
65	cg05330668
66	cg05438508
67	cg01425054
68	cg20918393
69	cg13294849
70	cg09463900
71	cg19605920
72	cg22893247
73	cg16528895
74	cg09386954
75	cg02503159
76	cg07323350
77	cg14280424
78	cg05401447
79	cg22125968
80	cg02582203
81	cg02172579
82	cg06368590
83	cg02458945
84	cg24662107
85	cg25900085
86	cg00630164
87	cg06550177
88	cg05403655
89	cg01623261
90	cg22897141
91	cg15126544
92	cg17002851
93	cg15292765
94	cg16732616
95	cg05103387
96	cg11736230
97	cg21656205
98	cg19066520
99	cg07222505
100	cg24455365
101	cg19447962
102	cg00920668
103	cg22714290
104	cg21762788
105	cg15140703
106	cg04734712
107	cg05940691
108	cg11460820
109	cg23501051
110	cg05447023
111	cg15149655
112	cg13438961
113	cg23363971
114	cg09657963
115	cg17276002
116	cg27602828
117	cg15123692
118	cg15384598
119	cg25327888
120	cg06484415
121	cg08455778
122	cg03339668
123	cg13826247
124	cg18173726
125	cg14931884
126	cg26755097
127	cg21130463
128	cg25834419
129	cg14457472
130	cg20560075
131	cg23693289
132	cg03805475
133	cg05230834
134	cg11714334
135	cg11245569
136	cg10224600
137	cg01454752
138	cg10755058
139	cg15564619
140	cg05016746
141	cg27404023
142	cg02226645
143	cg24105081
144	cg08203192
145	cg22212414
146	cg04880138
147	cg21053323
148	cg18572413
149	cg26309929
150	cg24724428
151	cg08061598
152	cg20478148
153	cg20441502
154	cg27272679
155	cg22155376
156	cg04104463
157	cg06590946
158	cg09436545
159	cg14076195
160	cg14876077
161	cg20577205
162	cg08599792
163	cg20595750
164	cg11246938
165	cg17733616
166	cg02286008
167	cg24707573
168	cg03209642
169	cg18193764
170	cg09791621
171	cg04173586
172	cg13421412
173	cg01889143
174	cg04659689
175	cg17107691
176	cg25019648
177	cg21820652
178	cg12348588
179	cg24773770
180	cg21610221
181	cg04417773
182	cg19706320
183	cg14149007
184	cg00463982
185	cg09675196
186	cg17540192
187	cg15028458
188	cg07139509
189	cg05212706
190	cg09335713
191	cg15043384
192	cg13323489
193	cg22463795
194	cg22365240
195	cg01678084
196	cg15202102
197	cg21211480
198	cg19108747
199	cg01178680
200	cg09026722
201	cg04709736
202	cg05845757
203	cg10098021
204	cg09456094
205	cg10292154
206	cg19537719
207	cg02119938
208	cg16776065
209	cg06970884
210	cg18196829
211	cg10823804
212	cg19333963
213	cg02125316
214	cg03634854
215	cg05721365
216	cg10285466
217	cg26796518
218	cg25739366
219	cg10169241
220	cg20293609
221	cg12350325
222	cg04150136
223	cg17560015
224	cg07458308
225	cg02903822
226	cg09365002
227	cg03953626
228	cg06436854
229	cg18586886
230	cg16398761
231	cg09157302
232	cg01514538
233	cg08959039
234	cg01263386
235	cg04115680
236	cg26505691
237	cg22481632
238	cg15496956
239	cg03306486
240	cg04004830
241	cg14557185
242	cg19389001
243	cg26465602
244	cg07065220
245	cg24375409
246	cg24792289
247	cg17534029
248	cg10615591
249	cg00010672
250	cg00019838
251	cg00022024
252	cg00030909
253	cg00041865
254	cg00076216
255	cg00098182
256	cg00100680
257	cg00101713
258	cg00120358
259	cg00136822
260	cg00144425
261	cg00158654
262	cg00163459
263	cg00172074
264	cg00172189
265	cg00172225
266	cg00179663
267	cg00187059
268	cg00187503
269	cg00199519
270	cg00204802
271	cg00222625
272	cg00237586
273	cg00249974
274	cg00300808
275	cg00308438
276	cg00323861
277	cg00334399
278	cg00353659
279	cg00359423
280	cg00374056
281	cg00389577
282	cg00432059
283	cg00449608
284	cg00454592
285	cg00469083
286	cg00487533
287	cg00495035
288	cg00530870
289	cg00571067
290	cg00589581
291	cg00591890
292	cg00598866
293	cg00599273
294	cg00621247
295	cg00622516
296	cg00627361
297	cg00643814
298	cg00646621
299	cg00666124
300	cg00695265
301	cg00703902
302	cg00720375
303	cg00734567
304	cg00767948
305	cg00789812
306	cg00789960
307	cg00793227
308	cg00804934
309	cg00806644
310	cg00820740
311	cg00826638
312	cg00828709
313	cg00842122
314	cg00853103
315	cg00864474
316	cg00867461
317	cg00890649
318	cg00894559
319	cg00917373
320	cg00919806
321	cg00921219
322	cg00932141
323	cg00942495
324	cg00977842
325	cg00997931
326	cg01005365
327	cg01006587
328	cg01025185
329	cg01035260
330	cg01075555
331	cg01092108
332	cg01093202
333	cg15316843
334	cg24348240
335	cg00498591
336	cg08499046
337	cg18055623
338	cg08384314
339	cg18987410
340	cg25633678
341	cg13341668
342	cg03487027
343	cg07316846
344	cg22272840
345	cg25386676
346	cg19470372
347	cg00880290
348	cg24500959
349	cg05542681
350	cg21762523
351	cg24925929
352	cg04243827
353	cg18404706
354	cg03827835
355	cg24766821
356	cg26540315
357	cg18520125
358	cg05516327
359	cg24028634
360	cg15105326
361	cg06943912
362	cg11536474
363	cg09074856
364	cg11355217
365	cg25020286
366	cg19068510
367	cg02297063
368	cg04742550
369	cg13024471
370	cg00295794
371	cg14972155
372	cg03517024
373	cg02390319
374	cg06100807
375	cg04875128
376	cg02668248
377	cg07420137
378	cg22711792
379	cg13434411
380	cg10927841
381	cg07482202
382	cg03331514
383	cg07434271
384	cg21593001
385	cg24956391
386	cg12605662
387	cg18396811
388	cg20327845
389	cg16622899
390	cg16627786
391	cg03531247
392	cg12140144
393	cg11767757
394	cg04484550
395	cg12177944
396	cg23521140
397	cg01829163
398	cg10137837
399	cg14058100
400	cg26556385
401	cg07180475
402	cg03263514
403	cg11549953
404	cg10591771
405	cg10836101
406	cg04313875
407	cg27115863
408	cg06889535
409	cg06899985
410	cg12121643
411	cg15628518
412	cg17807131
413	cg14712531
414	cg08230483
415	cg19893585
416	cg03061122
417	cg01113680
418	cg01120369
419	cg01134758
420	cg01144436
421	cg01158161
422	cg01166299
423	cg01168776
424	cg01243992
425	cg01312412
426	cg01331309
427	cg01384290
428	cg01392772
429	cg01421830
430	cg01422881
431	cg01434672
432	cg01454305
433	cg01454612
434	cg01502653
435	cg01532392
436	cg01546248
437	cg01556514
438	cg01576459
439	cg01606770
440	cg01607444
441	cg01608493
442	cg01631596
443	cg01667018
444	cg01680674
445	cg01682157
446	cg01691160
447	cg01703355
448	cg01732495
449	cg01775492
450	cg01804183
451	cg01812328
452	cg01813738
453	cg01842321
454	cg01866770
455	cg01880399
456	cg01880569
457	cg01886855
458	cg01892980
459	cg01899074
460	cg01914555
461	cg01915642
462	cg01937267
463	cg01954957
464	cg01965462
465	cg01995393
466	cg02007786
467	cg02032696
468	cg02042823
469	cg02057688
470	cg02068832
471	cg02088197
472	cg02106712
473	cg02114341
474	cg02129712
475	cg02133070
476	cg02136622
477	cg02151535
478	cg02159654
479	cg02166725
480	cg02175309
481	cg02217063
482	cg02219607
483	cg02242345
484	cg02271603
485	cg02278959
486	cg02279471
487	cg02303592
488	cg02335863
489	cg02347859
490	cg02356993
491	cg02368469
492	cg02378074
493	cg02397179
494	cg02401614
495	cg02412684
496	cg02419321
497	cg02421824
498	cg02430732
499	cg02432101
500	cg02466008
aSelected loci that define cell type identity based on T-test comparations between each pair of reference classes.
Abbreviations: EDec: Epigenomic deconvolution method; OC: Occipital cortex.

## Sheet: TS5_EDec_3ct model proportions
Table S5. Matrix of estimated proportions of constituent cell types in the OC sample by EDec stage 1a using a 3 cell-type models and markers_ovrb
Sample_Id	HBMVEC	Glia	Neuron
UK.1OCCIP2	19.8%	44.1%	36.1%
UK.1OCCIP4	53.3%	37.7%	9.0%
UK.1OCCIP5	24.4%	16.3%	59.3%
UK.1OCCIP6	45.0%	35.9%	19.1%
UK.1OCCIP7	50.0%	29.3%	20.7%
UK.1OCCIP8	40.4%	33.9%	25.7%
UK.1OCCIP9	37.3%	17.6%	45.1%
UK.1OCCIP14	42.5%	34.4%	23.2%
UK.1OCCIP15	25.3%	14.2%	60.5%
UK.1OCCIP17	45.8%	19.6%	34.6%
UK.1OCCIP24	0.0%	1.2%	98.8%
UK.1OCCIP27	26.5%	29.7%	43.8%
UK.1OCCIP31	33.9%	20.7%	45.3%
UK.1OCCIP35	37.9%	13.2%	48.9%
UK.1OCCIP36	49.1%	32.3%	18.5%
UK.1OCCIP41	29.6%	17.2%	53.2%
UK.1OCCIP45	37.8%	46.5%	15.8%
UK.1OCCIP46	36.3%	25.1%	38.6%
UK.1OCCIP47	62.0%	38.0%	0.0%
UK.1OCCIP49	20.0%	65.7%	14.3%
UK.1OCCIP50	9.0%	9.6%	81.3%
UK.1OCCIP51	37.1%	23.1%	39.8%
UK.1OCCIP53	57.9%	0.0%	42.1%
UK.1OCCIP54	44.4%	35.5%	20.1%
UK.1OCCIP55	38.9%	25.6%	35.5%
UK.1OCCIP56	0.0%	70.4%	29.6%
UK.1OCCIP57	39.3%	33.9%	26.9%
UK.1OCCIP58	33.5%	21.2%	45.3%
UK.1OCCIP59	35.0%	19.1%	45.9%
Average cell type proportion	34.90%	28.00%	37.10%
aCell type specific analysis of complex tissues by the EDec method.
bSelected loci that define cell type identity based on T-test comparations of each class of reference against all other samples.
Abbreviations: EDec: Epigenomic deconvolution method; HBMVEC: Human brain microvascular endothelial cells; OC: Occipital cortex.

## Sheet: TS6_LRM_DLPFC_NeuN+
Table S6. DDR1 CpG sites with 5-mC levels differentially methylated between patients with BD and HCs in DLPFC and NeuN+ nuclei from the FC tissues
Dataset	CpG	HC	BD	%variation	p-value	Adj p-valuea
DLPFC (BD=4, HC=4)	DDR1 avg 5-mC	0.362 ± 0.015	0.381 ± 0.025	0.052	0.197	NA
	cg11977634	0.079 ± 0.007	0.094 ± 0.007	0.19	0.754	NA
	cg03270204	0.644 ± 0.033	0.667 ± 0.048	0.036	0.353	NA
NeuN+ nuclei (BD=26, HC=27)	DDR1 avg 5-mC	0.615 ± 0.016	0.614 ± 0.018	-0.002	0.498329	NA
	cg24282845	0.955 ± 0.006	0.950 ± 0.008	-0.005	0.0124863	0.5
	cg24790028	0.881 ± 0.018	0.888 ± 0.013	0.008	0.0147029	0.5
	cg25251478	0.163 ± 0.018	0.149 ± 0.012	-0.086	0.00479301	0.5
aF-test LRM comparing 5-mC levels (M-values) between cases and controls using sex, age, brain pH, PMI, and %glia as covariables in DLPFC and age, sex, and PMI in NeuN+ model. bPost hoc Benjamini & Hochberg method for multiple testing correction.
Abbreviations: 5-mC: 5-methylcytosine; BD: Bipolar disorder; DLPFC: Dorsolateral prefrontal cortex; FC: Frontal cortex; HCs: Healthy controls; LRM: Linear regression model; NeuN+: Neuronal nuclei; PMI: Postmortem interval.

## Sheet: TS7_Correlations DDR1 5-mC_mRNA
Table S7. Significant correlations between DDR1 5-mC levels and DDR1 isoform mRNA levels in OC tissue
DDR1 5-mC	DDR1 transcript	ρa	p-value	Adj p-valueb
cg16111190	Total mRNA	-0.46	0.0130616	0.0312673
cg18093866	Total mRNA	-0.43	0.0207946	0.0472752
cg24282845	a	-0.48	0.00791806	0.0203457
cg06012011	a	-0.43	0.0209406	0.0475374
cg25943433	b	0.63	0.000272263	0.00112182
cg08913013	b	0.53	0.00312177	0.00917031
cg02696067	b	0.49	0.00736126	0.0190942
cg18577693	b	0.47	0.01034	0.0255401
cg18577693	c	-0.53	0.00320164	0.0093636
cg08913013	c	-0.45	0.013665	0.0324614
cg15720085	c	-0.45	0.0151056	0.0355569
cg02696067	c	-0.44	0.0172203	0.0398696
cg25943433	c	-0.44	0.0175011	0.0404794
cg24282845	c	-0.43	0.0189622	0.0435991
cg16111190	d	-0.64	0.000185043	0.00080264
cg08913013	d	-0.59	0.000722732	0.00258849
cg19215110	d	-0.59	0.000770358	0.002738
cg01936707	d	-0.57	0.00118761	0.00393279
cg14928451	d	-0.56	0.00149632	0.00479152
cg08673763	d	-0.55	0.00214244	0.00661177
cg11676038	d	-0.54	0.00234058	0.00713334
cg13329862	d	-0.54	0.00245883	0.00743881
cg12669395	d	-0.54	0.00262449	0.00785828
cg16215084	d	-0.53	0.00303273	0.00894827
cg00934322	d	-0.52	0.00368003	0.0105182
cg24566261	d	-0.52	0.00385428	0.0109291
cg01598675	d	-0.52	0.00416038	0.0116832
cg14790552	d	-0.52	0.00416038	0.0116832
cg07908039	d	-0.51	0.00426693	0.0119536
cg08951271	d	-0.51	0.00493204	0.0134684
cg07979747	d	-0.5	0.00530942	0.0143641
cg14058861	d	-0.5	0.00536155	0.0144642
cg00034425	d	-0.5	0.00546711	0.0147053
cg21677258	d	-0.5	0.00596429	0.0158866
cg02695062	d	-0.49	0.00714106	0.0185856
cg09822812	d	-0.49	0.0074815	0.019374
cg25251478	d	-0.49	0.00755121	0.0195216
cg27237814	d	-0.48	0.0079445	0.0204024
cg19591099	d	-0.48	0.0079811	0.020474
cg27593250	d	-0.47	0.00982538	0.0245024
cg16993957	d	-0.47	0.0100458	0.0249724
cg07912416	d	-0.47	0.0105919	0.0260242
cg17176005	d	-0.46	0.0111626	0.0272682
cg25655106	d	-0.46	0.0114575	0.0279007
cg25943433	d	-0.46	0.0116074	0.0282067
cg15720085	d	-0.46	0.0116074	0.0282067
cg16797094	d	-0.46	0.0118098	0.0286387
cg17604312	d	-0.45	0.0133106	0.0317632
cg11530564	d	-0.45	0.0138255	0.032809
cg18577693	d	-0.45	0.0138837	0.0329304
cg06501109	d	-0.45	0.0141778	0.0335597
cg13351860	d	-0.45	0.014967	0.0353021
cg05703744	d	-0.44	0.0159226	0.0373103
cg20560640	d	-0.44	0.0169282	0.039326
cg12847793	d	-0.44	0.0182037	0.0420001
cg24727290	d	-0.43	0.0191733	0.0440193
cg06200824	d	-0.43	0.0214069	0.0483133
DDR1 avg 5-mC	d	-0.55	0.00195896	0.00610095
cg24646556	e	-0.46	0.0127573	0.0306948
aSpearman Correlation.
bPost hoc Benjamini & Hochberg method for multiple testing correction.
Abbreviations: 5-mC: 5-methylcytosine; Avg: Average; mRNA: Messenger mRNA; OC: Occipital cortex.

## Sheet: TS8_ Comethylation OC
Table S8. Adjusted significant correlation coefficients ≥ 0.75 for individual CpG 5-mC levels between DDR1 5-mC levels and selected Myelin genes in OC tissues
DDR1 CpG	Gene CpG	Cell type marker	ρa	p-value	Adj p-valueb
DDR1_cg00466425	CNP_cg01443071	Myelin	0.86	1.79e-09	7.04e-08
DDR1_cg01936707	CNP_cg01443071	Myelin	0.89	1.09e-10	6.12e-09
DDR1_cg05703744	CNP_cg01443071	Myelin	0.87	8.46e-10	3.63e-08
DDR1_cg06200824	CNP_cg01443071	Myelin	0.79	3.34e-07	7.75e-06
DDR1_cg06501109	CNP_cg01443071	Myelin	0.82	4.5e-08	1.27e-06
DDR1_cg07912416	CNP_cg01443071	Myelin	0.84	1.37e-08	4.33e-07
DDR1_cg07979747	CNP_cg01443071	Myelin	0.9	3.71e-11	2.44e-09
DDR1_cg08673763	CNP_cg01443071	Myelin	0.87	1.18e-09	4.87e-08
DDR1_cg08951271	CNP_cg01443071	Myelin	0.94	3.24e-14	7.65e-12
DDR1_cg11530564	CNP_cg01443071	Myelin	0.86	1.87e-09	7.34e-08
DDR1_cg11676038	CNP_cg01443071	Myelin	0.94	1.03e-13	1.89e-11
DDR1_cg12669395	CNP_cg01443071	Myelin	0.87	6.63e-10	2.93e-08
DDR1_cg13329862	CNP_cg01443071	Myelin	0.89	8.16e-11	4.81e-09
DDR1_cg13351860	CNP_cg01443071	Myelin	0.86	3.32e-09	1.22e-07
DDR1_cg14058861	CNP_cg01443071	Myelin	0.81	1.32e-07	3.34e-06
DDR1_cg14790552	CNP_cg01443071	Myelin	0.85	5.5e-09	1.92e-07
DDR1_cg15656686	CNP_cg01443071	Myelin	0.82	4.99e-08	1.39e-06
DDR1_cg16111190	CNP_cg01443071	Myelin	0.84	1.17e-08	3.77e-07
DDR1_cg16797094	CNP_cg01443071	Myelin	0.87	7.31e-10	3.2e-08
DDR1_cg17176005	CNP_cg01443071	Myelin	0.82	4.99e-08	1.39e-06
DDR1_cg17604312	CNP_cg01443071	Myelin	0.82	5.52e-08	1.52e-06
DDR1_cg18577693	CNP_cg01443071	Myelin	0.78	5.22e-07	1.16e-05
DDR1_cg19215110	CNP_cg01443071	Myelin	0.83	1.78e-08	5.48e-07
DDR1_cg19591099	CNP_cg01443071	Myelin	0.8	2.09e-07	5.07e-06
DDR1_cg21677258	CNP_cg01443071	Myelin	0.91	8.63e-12	7.11e-10
DDR1_cg24636809	CNP_cg01443071	Myelin	0.88	3.43e-10	1.66e-08
DDR1_cg24727290	CNP_cg01443071	Myelin	0.85	3.77e-09	1.37e-07
DDR1_cg25613385	CNP_cg01443071	Myelin	0.77	1.22e-06	2.47e-05
DDR1_cg25655106	CNP_cg01443071	Myelin	0.9	3.28e-11	2.19e-09
DDR1_cg27237814	CNP_cg01443071	Myelin	0.87	5.43e-10	2.47e-08
DDR1_cg27593250	CNP_cg01443071	Myelin	0.78	5.83e-07	1.28e-05
DDR1_cg00466425	CNP_cg02357631	Myelin	0.85	4.47e-09	1.59e-07
DDR1_cg01936707	CNP_cg02357631	Myelin	0.86	3.04e-09	1.13e-07
DDR1_cg05703744	CNP_cg02357631	Myelin	0.79	4.3e-07	9.73e-06
DDR1_cg06200824	CNP_cg02357631	Myelin	0.8	2.03e-07	4.93e-06
DDR1_cg06501109	CNP_cg02357631	Myelin	0.78	5.67e-07	1.25e-05
DDR1_cg07912416	CNP_cg02357631	Myelin	0.81	1.36e-07	3.44e-06
DDR1_cg07979747	CNP_cg02357631	Myelin	0.76	2.04e-06	3.9e-05
DDR1_cg08673763	CNP_cg02357631	Myelin	0.84	1.59e-08	4.96e-07
DDR1_cg08951271	CNP_cg02357631	Myelin	0.84	1.59e-08	4.96e-07
DDR1_cg11530564	CNP_cg02357631	Myelin	0.81	1.13e-07	2.9e-06
DDR1_cg11676038	CNP_cg02357631	Myelin	0.92	1.3e-12	1.46e-10
DDR1_cg12669395	CNP_cg02357631	Myelin	0.87	9.77e-10	4.12e-08
DDR1_cg13329862	CNP_cg02357631	Myelin	0.84	1.17e-08	3.77e-07
DDR1_cg13351860	CNP_cg02357631	Myelin	0.8	1.64e-07	4.08e-06
DDR1_cg14058861	CNP_cg02357631	Myelin	0.79	3.96e-07	9.02e-06
DDR1_cg14790552	CNP_cg02357631	Myelin	0.82	4.82e-08	1.35e-06
DDR1_cg15656686	CNP_cg02357631	Myelin	0.77	1.04e-06	2.15e-05
DDR1_cg16111190	CNP_cg02357631	Myelin	0.81	7.44e-08	1.99e-06
DDR1_cg16797094	CNP_cg02357631	Myelin	0.77	1.02e-06	2.1e-05
DDR1_cg19591099	CNP_cg02357631	Myelin	0.84	8.24e-09	2.76e-07
DDR1_cg21677258	CNP_cg02357631	Myelin	0.82	4.66e-08	1.31e-06
DDR1_cg24636809	CNP_cg02357631	Myelin	0.85	6.74e-09	2.3e-07
DDR1_cg24727290	CNP_cg02357631	Myelin	0.77	1.15e-06	2.36e-05
DDR1_cg25655106	CNP_cg02357631	Myelin	0.85	5.06e-09	1.78e-07
DDR1_cg27237814	CNP_cg02357631	Myelin	0.8	2.15e-07	5.2e-06
DDR1_cg27593250	CNP_cg02357631	Myelin	0.82	4.2e-08	1.19e-06
DDR1_cg00466425	CNP_cg09479341	Myelin	0.91	5.62e-12	4.93e-10
DDR1_cg01936707	CNP_cg09479341	Myelin	0.91	9.26e-12	7.51e-10
DDR1_cg05703744	CNP_cg09479341	Myelin	0.9	2.88e-11	1.96e-09
DDR1_cg06200824	CNP_cg09479341	Myelin	0.79	4.07e-07	9.25e-06
DDR1_cg06501109	CNP_cg09479341	Myelin	0.82	4.99e-08	1.39e-06
DDR1_cg07912416	CNP_cg09479341	Myelin	0.84	1.47e-08	4.63e-07
DDR1_cg07979747	CNP_cg09479341	Myelin	0.85	7.31e-09	2.47e-07
DDR1_cg08673763	CNP_cg09479341	Myelin	0.86	2.91e-09	1.08e-07
DDR1_cg08951271	CNP_cg09479341	Myelin	0.92	7.84e-13	9.64e-11
DDR1_cg09822812	CNP_cg09479341	Myelin	0.75	2.85e-06	5.22e-05
DDR1_cg09965419	CNP_cg09479341	Myelin	0.78	7.62e-07	1.62e-05
DDR1_cg11530564	CNP_cg09479341	Myelin	0.89	9.72e-11	5.55e-09
DDR1_cg11676038	CNP_cg09479341	Myelin	0.9	1.95e-11	1.41e-09
DDR1_cg12669395	CNP_cg09479341	Myelin	0.91	6.98e-12	5.91e-10
DDR1_cg12847793	CNP_cg09479341	Myelin	0.75	2.25e-06	4.24e-05
DDR1_cg13329862	CNP_cg09479341	Myelin	0.92	3.34e-12	3.17e-10
DDR1_cg13351860	CNP_cg09479341	Myelin	0.91	6.04e-12	5.23e-10
DDR1_cg14058861	CNP_cg09479341	Myelin	0.83	2.76e-08	8.11e-07
DDR1_cg14790552	CNP_cg09479341	Myelin	0.81	9.34e-08	2.45e-06
DDR1_cg15656686	CNP_cg09479341	Myelin	0.88	4.44e-10	2.07e-08
DDR1_cg16111190	CNP_cg09479341	Myelin	0.88	3.26e-10	1.59e-08
DDR1_cg16797094	CNP_cg09479341	Myelin	0.85	4.11e-09	1.48e-07
DDR1_cg17176005	CNP_cg09479341	Myelin	0.79	4.43e-07	9.98e-06
DDR1_cg17604312	CNP_cg09479341	Myelin	0.8	2.03e-07	4.93e-06
DDR1_cg18577693	CNP_cg09479341	Myelin	0.76	1.99e-06	3.82e-05
DDR1_cg19215110	CNP_cg09479341	Myelin	0.8	2.42e-07	5.8e-06
DDR1_cg19591099	CNP_cg09479341	Myelin	0.83	2.14e-08	6.46e-07
DDR1_cg21677258	CNP_cg09479341	Myelin	0.89	8.16e-11	4.81e-09
DDR1_cg24566261	CNP_cg09479341	Myelin	0.76	1.52e-06	3.01e-05
DDR1_cg24636809	CNP_cg09479341	Myelin	0.86	2.05e-09	7.94e-08
DDR1_cg24727290	CNP_cg09479341	Myelin	0.86	3.18e-09	1.17e-07
DDR1_cg25655106	CNP_cg09479341	Myelin	0.91	1.22e-11	9.52e-10
DDR1_cg27237814	CNP_cg09479341	Myelin	0.86	2.24e-09	8.58e-08
DDR1_cg27593250	CNP_cg09479341	Myelin	0.79	3.43e-07	7.95e-06
DDR1_cg19018599	CNP_cg09575037	Myelin	0.76	1.41e-06	2.82e-05
DDR1_cg19894264	CNP_cg09575037	Myelin	0.84	1.09e-08	3.52e-07
DDR1_cg01936707	CNP_cg13917614	Myelin	0.8	1.74e-07	4.31e-06
DDR1_cg05703744	CNP_cg13917614	Myelin	0.83	1.85e-08	5.67e-07
DDR1_cg06501109	CNP_cg13917614	Myelin	0.75	3.43e-06	6.15e-05
DDR1_cg07912416	CNP_cg13917614	Myelin	0.78	7.62e-07	1.62e-05
DDR1_cg07979747	CNP_cg13917614	Myelin	0.76	2.2e-06	4.15e-05
DDR1_cg09965419	CNP_cg13917614	Myelin	0.76	1.77e-06	3.43e-05
DDR1_cg11530564	CNP_cg13917614	Myelin	0.83	2.47e-08	7.36e-07
DDR1_cg11676038	CNP_cg13917614	Myelin	0.77	1.34e-06	2.7e-05
DDR1_cg12669395	CNP_cg13917614	Myelin	0.83	2.76e-08	8.11e-07
DDR1_cg13351860	CNP_cg13917614	Myelin	0.82	5.9e-08	1.62e-06
DDR1_cg13695585	CNP_cg13917614	Myelin	0.76	2.09e-06	3.98e-05
DDR1_cg14790552	CNP_cg13917614	Myelin	0.78	6.67e-07	1.44e-05
DDR1_cg15656686	CNP_cg13917614	Myelin	0.85	3.61e-09	1.32e-07
DDR1_cg16797094	CNP_cg13917614	Myelin	0.82	5.34e-08	1.47e-06
DDR1_cg17176005	CNP_cg13917614	Myelin	0.78	7.62e-07	1.62e-05
DDR1_cg17604312	CNP_cg13917614	Myelin	0.83	1.92e-08	5.86e-07
DDR1_cg21677258	CNP_cg13917614	Myelin	0.81	9.65e-08	2.52e-06
DDR1_cg25655106	CNP_cg13917614	Myelin	0.79	3.53e-07	8.16e-06
DDR1_cg00466425	CNP_cg14376548	Myelin	0.89	1.03e-10	5.83e-09
DDR1_cg01598675	CNP_cg14376548	Myelin	0.79	3.74e-07	8.58e-06
DDR1_cg01936707	CNP_cg14376548	Myelin	0.88	2.37e-10	1.2e-08
DDR1_cg05703744	CNP_cg14376548	Myelin	0.87	7.31e-10	3.2e-08
DDR1_cg06200824	CNP_cg14376548	Myelin	0.8	2.15e-07	5.2e-06
DDR1_cg06501109	CNP_cg14376548	Myelin	0.82	5.71e-08	1.57e-06
DDR1_cg07912416	CNP_cg14376548	Myelin	0.83	1.99e-08	6.05e-07
DDR1_cg07979747	CNP_cg14376548	Myelin	0.86	1.63e-09	6.49e-08
DDR1_cg08673763	CNP_cg14376548	Myelin	0.87	6.31e-10	2.82e-08
DDR1_cg08951271	CNP_cg14376548	Myelin	0.93	4.65e-13	6.26e-11
DDR1_cg11530564	CNP_cg14376548	Myelin	0.87	6.96e-10	3.06e-08
DDR1_cg11676038	CNP_cg14376548	Myelin	0.91	4.85e-12	4.35e-10
DDR1_cg12669395	CNP_cg14376548	Myelin	0.9	2.38e-11	1.66e-09
DDR1_cg13329862	CNP_cg14376548	Myelin	0.9	5.37e-11	3.35e-09
DDR1_cg13351860	CNP_cg14376548	Myelin	0.87	1.3e-09	5.3e-08
DDR1_cg14058861	CNP_cg14376548	Myelin	0.83	3.29e-08	9.53e-07
DDR1_cg14790552	CNP_cg14376548	Myelin	0.89	7.69e-11	4.57e-09
DDR1_cg15656686	CNP_cg14376548	Myelin	0.83	2.57e-08	7.6e-07
DDR1_cg15720085	CNP_cg14376548	Myelin	0.78	4.81e-07	1.07e-05
DDR1_cg16111190	CNP_cg14376548	Myelin	0.88	3.43e-10	1.66e-08
DDR1_cg16797094	CNP_cg14376548	Myelin	0.85	7.92e-09	2.66e-07
DDR1_cg17176005	CNP_cg14376548	Myelin	0.82	4.5e-08	1.27e-06
DDR1_cg17604312	CNP_cg14376548	Myelin	0.79	3.15e-07	7.35e-06
DDR1_cg18577693	CNP_cg14376548	Myelin	0.81	1.24e-07	3.16e-06
DDR1_cg19215110	CNP_cg14376548	Myelin	0.79	3.24e-07	7.55e-06
DDR1_cg19591099	CNP_cg14376548	Myelin	0.84	1.47e-08	4.63e-07
DDR1_cg21677258	CNP_cg14376548	Myelin	0.9	1.6e-11	1.19e-09
DDR1_cg24566261	CNP_cg14376548	Myelin	0.75	2.41e-06	4.52e-05
DDR1_cg24636809	CNP_cg14376548	Myelin	0.85	3.61e-09	1.32e-07
DDR1_cg24727290	CNP_cg14376548	Myelin	0.81	7.44e-08	1.99e-06
DDR1_cg25655106	CNP_cg14376548	Myelin	0.89	7.69e-11	4.57e-09
DDR1_cg27237814	CNP_cg14376548	Myelin	0.89	1.09e-10	6.12e-09
DDR1_cg27593250	CNP_cg14376548	Myelin	0.8	2.09e-07	5.07e-06
DDR1_cg00466425	CNP_cg14826331	Myelin	0.87	8.46e-10	3.63e-08
DDR1_cg00934322	CNP_cg14826331	Myelin	0.75	2.25e-06	4.24e-05
DDR1_cg01936707	CNP_cg14826331	Myelin	0.92	8.54e-13	1.03e-10
DDR1_cg05703744	CNP_cg14826331	Myelin	0.91	1.31e-11	1.01e-09
DDR1_cg06200824	CNP_cg14826331	Myelin	0.76	1.95e-06	3.73e-05
DDR1_cg06501109	CNP_cg14826331	Myelin	0.82	4.35e-08	1.23e-06
DDR1_cg07908039	CNP_cg14826331	Myelin	0.76	1.68e-06	3.28e-05
DDR1_cg07912416	CNP_cg14826331	Myelin	0.84	1.37e-08	4.33e-07
DDR1_cg07979747	CNP_cg14826331	Myelin	0.86	1.96e-09	7.64e-08
DDR1_cg08673763	CNP_cg14826331	Myelin	0.88	3.81e-10	1.82e-08
DDR1_cg08951271	CNP_cg14826331	Myelin	0.92	1.41e-12	1.55e-10
DDR1_cg11530564	CNP_cg14826331	Myelin	0.91	7.49e-12	6.29e-10
DDR1_cg11676038	CNP_cg14826331	Myelin	0.95	1.33e-15	7.11e-13
DDR1_cg12669395	CNP_cg14826331	Myelin	0.91	4.18e-12	3.82e-10
DDR1_cg13329862	CNP_cg14826331	Myelin	0.91	9.26e-12	7.51e-10
DDR1_cg13351860	CNP_cg14826331	Myelin	0.9	2.09e-11	1.49e-09
DDR1_cg14058861	CNP_cg14826331	Myelin	0.8	1.45e-07	3.64e-06
DDR1_cg14790552	CNP_cg14826331	Myelin	0.87	1.42e-09	5.75e-08
DDR1_cg15656686	CNP_cg14826331	Myelin	0.84	9.28e-09	3.06e-07
DDR1_cg16111190	CNP_cg14826331	Myelin	0.88	2.13e-10	1.1e-08
DDR1_cg16797094	CNP_cg14826331	Myelin	0.89	1.09e-10	6.12e-09
DDR1_cg17176005	CNP_cg14826331	Myelin	0.78	6.32e-07	1.37e-05
DDR1_cg17604312	CNP_cg14826331	Myelin	0.82	6.74e-08	1.82e-06
DDR1_cg19215110	CNP_cg14826331	Myelin	0.82	6.1e-08	1.67e-06
DDR1_cg19591099	CNP_cg14826331	Myelin	0.83	3.41e-08	9.84e-07
DDR1_cg21677258	CNP_cg14826331	Myelin	0.9	4.47e-11	2.86e-09
DDR1_cg24636809	CNP_cg14826331	Myelin	0.88	2.64e-10	1.32e-08
DDR1_cg24727290	CNP_cg14826331	Myelin	0.85	6.74e-09	2.3e-07
DDR1_cg25613385	CNP_cg14826331	Myelin	0.75	2.53e-06	4.71e-05
DDR1_cg25655106	CNP_cg14826331	Myelin	0.91	6.49e-12	5.56e-10
DDR1_cg27237814	CNP_cg14826331	Myelin	0.86	1.96e-09	7.64e-08
DDR1_cg27593250	CNP_cg14826331	Myelin	0.82	6.52e-08	1.77e-06
DDR1_cg00466425	CNP_cg16563470	Myelin	0.78	6.67e-07	1.44e-05
DDR1_cg00934322	CNP_cg16563470	Myelin	0.79	2.73e-07	6.44e-06
DDR1_cg01936707	CNP_cg16563470	Myelin	0.82	4.99e-08	1.39e-06
DDR1_cg05703744	CNP_cg16563470	Myelin	0.85	5.28e-09	1.85e-07
DDR1_cg06501109	CNP_cg16563470	Myelin	0.8	2.22e-07	5.35e-06
DDR1_cg07908039	CNP_cg16563470	Myelin	0.75	3.2e-06	5.78e-05
DDR1_cg07912416	CNP_cg16563470	Myelin	0.76	1.45e-06	2.88e-05
DDR1_cg08673763	CNP_cg16563470	Myelin	0.83	2.39e-08	7.13e-07
DDR1_cg08951271	CNP_cg16563470	Myelin	0.8	2.22e-07	5.35e-06
DDR1_cg09822812	CNP_cg16563470	Myelin	0.77	9.4e-07	1.96e-05
DDR1_cg09965419	CNP_cg16563470	Myelin	0.86	3.04e-09	1.13e-07
DDR1_cg11530564	CNP_cg16563470	Myelin	0.85	4.11e-09	1.48e-07
DDR1_cg11676038	CNP_cg16563470	Myelin	0.75	2.72e-06	5.01e-05
DDR1_cg12669395	CNP_cg16563470	Myelin	0.84	1.09e-08	3.52e-07
DDR1_cg12847793	CNP_cg16563470	Myelin	0.75	3.13e-06	5.67e-05
DDR1_cg13329862	CNP_cg16563470	Myelin	0.83	3.07e-08	8.93e-07
DDR1_cg13351860	CNP_cg16563470	Myelin	0.89	6.83e-11	4.13e-09
DDR1_cg13695585	CNP_cg16563470	Myelin	0.81	9.34e-08	2.45e-06
DDR1_cg14790552	CNP_cg16563470	Myelin	0.75	3.13e-06	5.67e-05
DDR1_cg15656686	CNP_cg16563470	Myelin	0.88	4.44e-10	2.07e-08
DDR1_cg16111190	CNP_cg16563470	Myelin	0.82	6.74e-08	1.82e-06
DDR1_cg16797094	CNP_cg16563470	Myelin	0.83	2.96e-08	8.66e-07
DDR1_cg17176005	CNP_cg16563470	Myelin	0.75	2.65e-06	4.91e-05
DDR1_cg17604312	CNP_cg16563470	Myelin	0.83	3.18e-08	9.22e-07
DDR1_cg20955507	CNP_cg16563470	Myelin	0.8	2.57e-07	6.12e-06
DDR1_cg21677258	CNP_cg16563470	Myelin	0.83	3.66e-08	1.05e-06
DDR1_cg24636809	CNP_cg16563470	Myelin	0.76	2.09e-06	3.98e-05
DDR1_cg24727290	CNP_cg16563470	Myelin	0.8	1.41e-07	3.54e-06
DDR1_cg25655106	CNP_cg16563470	Myelin	0.87	8.46e-10	3.63e-08
DDR1_cg27237814	CNP_cg16563470	Myelin	0.78	7.83e-07	1.66e-05
DDR1_cg00466425	CNP_cg20212624	Myelin	0.82	5.34e-08	1.47e-06
DDR1_cg00934322	CNP_cg20212624	Myelin	0.78	6.15e-07	1.34e-05
DDR1_cg01936707	CNP_cg20212624	Myelin	0.82	5.71e-08	1.57e-06
DDR1_cg05703744	CNP_cg20212624	Myelin	0.91	5.62e-12	4.93e-10
DDR1_cg06501109	CNP_cg20212624	Myelin	0.78	5.52e-07	1.22e-05
DDR1_cg07187855	CNP_cg20212624	Myelin	0.78	7.83e-07	1.66e-05
DDR1_cg07908039	CNP_cg20212624	Myelin	0.76	2.2e-06	4.15e-05
DDR1_cg07912416	CNP_cg20212624	Myelin	0.79	2.89e-07	6.8e-06
DDR1_cg07979747	CNP_cg20212624	Myelin	0.81	7.95e-08	2.11e-06
DDR1_cg08673763	CNP_cg20212624	Myelin	0.77	1.22e-06	2.47e-05
DDR1_cg08684361	CNP_cg20212624	Myelin	0.83	2.22e-08	6.67e-07
DDR1_cg08951271	CNP_cg20212624	Myelin	0.85	4.11e-09	1.48e-07
DDR1_cg09822812	CNP_cg20212624	Myelin	0.76	1.49e-06	2.95e-05
DDR1_cg09965419	CNP_cg20212624	Myelin	0.84	1.13e-08	3.65e-07
DDR1_cg11530564	CNP_cg20212624	Myelin	0.89	1.03e-10	5.83e-09
DDR1_cg11676038	CNP_cg20212624	Myelin	0.8	1.69e-07	4.19e-06
DDR1_cg12669395	CNP_cg20212624	Myelin	0.85	5.5e-09	1.92e-07
DDR1_cg12847793	CNP_cg20212624	Myelin	0.83	2.3e-08	6.9e-07
DDR1_cg13329862	CNP_cg20212624	Myelin	0.88	2.93e-10	1.45e-08
DDR1_cg13351860	CNP_cg20212624	Myelin	0.9	3.28e-11	2.19e-09
DDR1_cg13695585	CNP_cg20212624	Myelin	0.81	7.95e-08	2.11e-06
DDR1_cg15656686	CNP_cg20212624	Myelin	0.87	1.3e-09	5.3e-08
DDR1_cg16111190	CNP_cg20212624	Myelin	0.8	2.09e-07	5.07e-06
DDR1_cg16797094	CNP_cg20212624	Myelin	0.87	1.07e-09	4.49e-08
DDR1_cg17176005	CNP_cg20212624	Myelin	0.8	1.54e-07	3.86e-06
DDR1_cg17604312	CNP_cg20212624	Myelin	0.82	6.1e-08	1.67e-06
DDR1_cg19215110	CNP_cg20212624	Myelin	0.76	1.52e-06	3.01e-05
DDR1_cg20955507	CNP_cg20212624	Myelin	0.78	7.62e-07	1.62e-05
DDR1_cg21677258	CNP_cg20212624	Myelin	0.85	7.31e-09	2.47e-07
DDR1_cg24636809	CNP_cg20212624	Myelin	0.81	1.28e-07	3.25e-06
DDR1_cg24727290	CNP_cg20212624	Myelin	0.83	2.57e-08	7.6e-07
DDR1_cg25613385	CNP_cg20212624	Myelin	0.75	2.36e-06	4.42e-05
DDR1_cg25655106	CNP_cg20212624	Myelin	0.84	1.27e-08	4.04e-07
DDR1_cg27237814	CNP_cg20212624	Myelin	0.81	1.1e-07	2.82e-06
DDR1_cg27593250	CNP_cg20212624	Myelin	0.8	2.5e-07	5.95e-06
DDR1_cg19018599	CNP_cg21248590	Myelin	0.76	1.95e-06	3.73e-05
DDR1_cg00466425	CNP_cg25015416	Myelin	0.77	1.1e-06	2.25e-05
DDR1_cg01598675	CNP_cg25015416	Myelin	0.76	1.6e-06	3.14e-05
DDR1_cg05703744	CNP_cg25015416	Myelin	0.86	2.05e-09	7.94e-08
DDR1_cg07912416	CNP_cg25015416	Myelin	0.76	1.9e-06	3.66e-05
DDR1_cg07979747	CNP_cg25015416	Myelin	0.76	1.64e-06	3.21e-05
DDR1_cg08673763	CNP_cg25015416	Myelin	0.86	2.91e-09	1.08e-07
DDR1_cg08951271	CNP_cg25015416	Myelin	0.8	1.54e-07	3.86e-06
DDR1_cg09822812	CNP_cg25015416	Myelin	0.84	1.42e-08	4.48e-07
DDR1_cg09965419	CNP_cg25015416	Myelin	0.75	2.47e-06	4.61e-05
DDR1_cg11530564	CNP_cg25015416	Myelin	0.83	3.07e-08	8.93e-07
DDR1_cg11676038	CNP_cg25015416	Myelin	0.75	2.78e-06	5.11e-05
DDR1_cg12669395	CNP_cg25015416	Myelin	0.82	6.1e-08	1.67e-06
DDR1_cg13329862	CNP_cg25015416	Myelin	0.85	5.06e-09	1.78e-07
DDR1_cg13351860	CNP_cg25015416	Myelin	0.85	6.74e-09	2.3e-07
DDR1_cg14790552	CNP_cg25015416	Myelin	0.82	4.66e-08	1.31e-06
DDR1_cg15656686	CNP_cg25015416	Myelin	0.81	1.32e-07	3.34e-06
DDR1_cg16111190	CNP_cg25015416	Myelin	0.75	2.98e-06	5.43e-05
DDR1_cg16797094	CNP_cg25015416	Myelin	0.81	7.44e-08	1.99e-06
DDR1_cg17176005	CNP_cg25015416	Myelin	0.76	1.45e-06	2.88e-05
DDR1_cg17604312	CNP_cg25015416	Myelin	0.84	1.59e-08	4.96e-07
DDR1_cg19215110	CNP_cg25015416	Myelin	0.8	2.03e-07	4.93e-06
DDR1_cg20955507	CNP_cg25015416	Myelin	0.81	1.13e-07	2.9e-06
DDR1_cg21677258	CNP_cg25015416	Myelin	0.82	4.2e-08	1.19e-06
DDR1_cg24636809	CNP_cg25015416	Myelin	0.81	9.05e-08	2.38e-06
DDR1_cg24727290	CNP_cg25015416	Myelin	0.81	1.24e-07	3.16e-06
DDR1_cg25655106	CNP_cg25015416	Myelin	0.86	2.91e-09	1.08e-07
DDR1_cg27237814	CNP_cg25015416	Myelin	0.83	3.07e-08	8.93e-07
DDR1_cg00466425	CNP_cg27435103	Myelin	0.9	3.49e-11	2.31e-09
DDR1_cg01936707	CNP_cg27435103	Myelin	0.9	5.71e-11	3.53e-09
DDR1_cg05703744	CNP_cg27435103	Myelin	0.91	6.04e-12	5.23e-10
DDR1_cg06200824	CNP_cg27435103	Myelin	0.84	1.53e-08	4.79e-07
DDR1_cg06501109	CNP_cg27435103	Myelin	0.84	8.24e-09	2.76e-07
DDR1_cg07912416	CNP_cg27435103	Myelin	0.86	1.79e-09	7.04e-08
DDR1_cg07979747	CNP_cg27435103	Myelin	0.88	4.22e-10	1.99e-08
DDR1_cg08673763	CNP_cg27435103	Myelin	0.9	3.07e-11	2.07e-09
DDR1_cg08951271	CNP_cg27435103	Myelin	0.92	1.19e-12	1.36e-10
DDR1_cg09965419	CNP_cg27435103	Myelin	0.8	1.8e-07	4.43e-06
DDR1_cg11530564	CNP_cg27435103	Myelin	0.88	3.61e-10	1.73e-08
DDR1_cg11676038	CNP_cg27435103	Myelin	0.91	9.26e-12	7.51e-10
DDR1_cg12669395	CNP_cg27435103	Myelin	0.92	2.86e-12	2.79e-10
DDR1_cg13329862	CNP_cg27435103	Myelin	0.9	5.37e-11	3.35e-09
DDR1_cg13351860	CNP_cg27435103	Myelin	0.92	1.41e-12	1.55e-10
DDR1_cg14058861	CNP_cg27435103	Myelin	0.83	1.92e-08	5.86e-07
DDR1_cg14790552	CNP_cg27435103	Myelin	0.88	4.01e-10	1.9e-08
DDR1_cg15656686	CNP_cg27435103	Myelin	0.86	1.71e-09	6.76e-08
DDR1_cg15720085	CNP_cg27435103	Myelin	0.8	2.35e-07	5.65e-06
DDR1_cg16111190	CNP_cg27435103	Myelin	0.87	1.42e-09	5.75e-08
DDR1_cg16797094	CNP_cg27435103	Myelin	0.85	5.73e-09	1.99e-07
DDR1_cg17176005	CNP_cg27435103	Myelin	0.84	1.17e-08	3.77e-07
DDR1_cg17604312	CNP_cg27435103	Myelin	0.81	1.28e-07	3.25e-06
DDR1_cg18577693	CNP_cg27435103	Myelin	0.8	2.42e-07	5.8e-06
DDR1_cg19215110	CNP_cg27435103	Myelin	0.82	5.9e-08	1.62e-06
DDR1_cg19591099	CNP_cg27435103	Myelin	0.83	2.66e-08	7.86e-07
DDR1_cg21677258	CNP_cg27435103	Myelin	0.91	9.93e-12	7.98e-10
DDR1_cg24566261	CNP_cg27435103	Myelin	0.76	1.72e-06	3.35e-05
DDR1_cg24636809	CNP_cg27435103	Myelin	0.88	4.22e-10	1.99e-08
DDR1_cg24727290	CNP_cg27435103	Myelin	0.87	1.24e-09	5.08e-08
DDR1_cg25655106	CNP_cg27435103	Myelin	0.92	2.65e-12	2.64e-10
DDR1_cg27237814	CNP_cg27435103	Myelin	0.87	8.06e-10	3.49e-08
DDR1_cg27593250	CNP_cg27435103	Myelin	0.79	3.43e-07	7.95e-06
DDR1_cg00466425	MAG_cg00162517	Myelin	0.91	8.05e-12	6.68e-10
DDR1_cg01598675	MAG_cg00162517	Myelin	0.76	1.6e-06	3.14e-05
DDR1_cg01936707	MAG_cg00162517	Myelin	0.89	1.09e-10	6.12e-09
DDR1_cg05703744	MAG_cg00162517	Myelin	0.92	1.94e-12	2.03e-10
DDR1_cg06200824	MAG_cg00162517	Myelin	0.81	9.65e-08	2.52e-06
DDR1_cg06501109	MAG_cg00162517	Myelin	0.76	2.09e-06	3.98e-05
DDR1_cg07912416	MAG_cg00162517	Myelin	0.85	4.11e-09	1.48e-07
DDR1_cg07979747	MAG_cg00162517	Myelin	0.88	3.09e-10	1.52e-08
DDR1_cg08673763	MAG_cg00162517	Myelin	0.84	9.65e-09	3.17e-07
DDR1_cg08951271	MAG_cg00162517	Myelin	0.92	2.45e-12	2.47e-10
DDR1_cg11530564	MAG_cg00162517	Myelin	0.91	9.26e-12	7.51e-10
DDR1_cg11676038	MAG_cg00162517	Myelin	0.95	4.44e-15	1.74e-12
DDR1_cg12669395	MAG_cg00162517	Myelin	0.93	1.53e-13	2.55e-11
DDR1_cg13329862	MAG_cg00162517	Myelin	0.92	2.1e-12	2.17e-10
DDR1_cg13351860	MAG_cg00162517	Myelin	0.88	3.26e-10	1.59e-08
DDR1_cg14058861	MAG_cg00162517	Myelin	0.77	1.13e-06	2.3e-05
DDR1_cg14790552	MAG_cg00162517	Myelin	0.87	1.42e-09	5.75e-08
DDR1_cg15656686	MAG_cg00162517	Myelin	0.87	6.63e-10	2.93e-08
DDR1_cg15720085	MAG_cg00162517	Myelin	0.77	1.31e-06	2.64e-05
DDR1_cg16111190	MAG_cg00162517	Myelin	0.87	7.31e-10	3.2e-08
DDR1_cg16797094	MAG_cg00162517	Myelin	0.87	1.36e-09	5.52e-08
DDR1_cg17176005	MAG_cg00162517	Myelin	0.78	5.83e-07	1.28e-05
DDR1_cg17604312	MAG_cg00162517	Myelin	0.81	9.96e-08	2.59e-06
DDR1_cg18577693	MAG_cg00162517	Myelin	0.75	2.47e-06	4.61e-05
DDR1_cg19215110	MAG_cg00162517	Myelin	0.8	1.59e-07	3.97e-06
DDR1_cg19591099	MAG_cg00162517	Myelin	0.88	3.26e-10	1.59e-08
DDR1_cg20335906	MAG_cg00162517	Myelin	0.75	2.98e-06	5.43e-05
DDR1_cg21677258	MAG_cg00162517	Myelin	0.9	4.76e-11	3.02e-09
DDR1_cg24636809	MAG_cg00162517	Myelin	0.9	3.71e-11	2.44e-09
DDR1_cg24727290	MAG_cg00162517	Myelin	0.84	1.53e-08	4.79e-07
DDR1_cg25655106	MAG_cg00162517	Myelin	0.89	7.69e-11	4.57e-09
DDR1_cg27237814	MAG_cg00162517	Myelin	0.89	6.83e-11	4.13e-09
DDR1_cg27593250	MAG_cg00162517	Myelin	0.8	2.57e-07	6.12e-06
DDR1_cg00466425	MAG_cg01349478	Myelin	0.93	6.61e-13	8.36e-11
DDR1_cg00934322	MAG_cg01349478	Myelin	0.77	8.25e-07	1.74e-05
DDR1_cg01598675	MAG_cg01349478	Myelin	0.79	3.34e-07	7.75e-06
DDR1_cg01936707	MAG_cg01349478	Myelin	0.91	9.93e-12	7.98e-10
DDR1_cg05703744	MAG_cg01349478	Myelin	0.93	3.55e-13	5.01e-11
DDR1_cg06200824	MAG_cg01349478	Myelin	0.87	1.02e-09	4.31e-08
DDR1_cg06501109	MAG_cg01349478	Myelin	0.83	3.18e-08	9.22e-07
DDR1_cg07908039	MAG_cg01349478	Myelin	0.77	8.69e-07	1.83e-05
DDR1_cg07912416	MAG_cg01349478	Myelin	0.87	8.88e-10	3.8e-08
DDR1_cg07979747	MAG_cg01349478	Myelin	0.86	1.71e-09	6.76e-08
DDR1_cg08673763	MAG_cg01349478	Myelin	0.91	9.93e-12	7.98e-10
DDR1_cg08951271	MAG_cg01349478	Myelin	0.92	2.1e-12	2.17e-10
DDR1_cg09965419	MAG_cg01349478	Myelin	0.8	2.29e-07	5.5e-06
DDR1_cg11530564	MAG_cg01349478	Myelin	0.9	2.38e-11	1.66e-09
DDR1_cg11676038	MAG_cg01349478	Myelin	0.94	3.24e-14	7.65e-12
DDR1_cg12669395	MAG_cg01349478	Myelin	0.93	1.14e-13	2.04e-11
DDR1_cg12847793	MAG_cg01349478	Myelin	0.75	2.3e-06	4.33e-05
DDR1_cg13329862	MAG_cg01349478	Myelin	0.94	6.84e-14	1.37e-11
DDR1_cg13351860	MAG_cg01349478	Myelin	0.93	6.06e-13	7.8e-11
DDR1_cg14058861	MAG_cg01349478	Myelin	0.83	2.57e-08	7.6e-07
DDR1_cg14790552	MAG_cg01349478	Myelin	0.9	5.06e-11	3.18e-09
DDR1_cg15656686	MAG_cg01349478	Myelin	0.88	4.44e-10	2.07e-08
DDR1_cg15720085	MAG_cg01349478	Myelin	0.78	5.83e-07	1.28e-05
DDR1_cg16111190	MAG_cg01349478	Myelin	0.91	5.22e-12	4.64e-10
DDR1_cg16797094	MAG_cg01349478	Myelin	0.88	3.61e-10	1.73e-08
DDR1_cg17176005	MAG_cg01349478	Myelin	0.81	7.69e-08	2.05e-06
DDR1_cg17604312	MAG_cg01349478	Myelin	0.83	3.53e-08	1.02e-06
DDR1_cg18577693	MAG_cg01349478	Myelin	0.77	8.69e-07	1.83e-05
DDR1_cg19215110	MAG_cg01349478	Myelin	0.81	8.48e-08	2.24e-06
DDR1_cg19591099	MAG_cg01349478	Myelin	0.88	2.93e-10	1.45e-08
DDR1_cg21677258	MAG_cg01349478	Myelin	0.91	6.98e-12	5.91e-10
DDR1_cg24566261	MAG_cg01349478	Myelin	0.82	5.52e-08	1.52e-06
DDR1_cg24636809	MAG_cg01349478	Myelin	0.9	3.49e-11	2.31e-09
DDR1_cg24727290	MAG_cg01349478	Myelin	0.87	9.31e-10	3.96e-08
DDR1_cg25655106	MAG_cg01349478	Myelin	0.92	2.27e-12	2.31e-10
DDR1_cg27237814	MAG_cg01349478	Myelin	0.9	1.71e-11	1.26e-09
DDR1_cg27593250	MAG_cg01349478	Myelin	0.83	1.92e-08	5.86e-07
DDR1_cg00466425	MAG_cg02127209	Myelin	0.82	6.97e-08	1.88e-06
DDR1_cg01598675	MAG_cg02127209	Myelin	0.75	2.53e-06	4.71e-05
DDR1_cg01936707	MAG_cg02127209	Myelin	0.88	3.09e-10	1.52e-08
DDR1_cg05703744	MAG_cg02127209	Myelin	0.87	9.77e-10	4.12e-08
DDR1_cg06200824	MAG_cg02127209	Myelin	0.75	3.35e-06	6.02e-05
DDR1_cg07908039	MAG_cg02127209	Myelin	0.78	4.81e-07	1.07e-05
DDR1_cg07912416	MAG_cg02127209	Myelin	0.85	7.92e-09	2.66e-07
DDR1_cg07979747	MAG_cg02127209	Myelin	0.85	5.73e-09	1.99e-07
DDR1_cg08673763	MAG_cg02127209	Myelin	0.87	1.07e-09	4.49e-08
DDR1_cg08951271	MAG_cg02127209	Myelin	0.9	2.38e-11	1.66e-09
DDR1_cg11530564	MAG_cg02127209	Myelin	0.94	6.17e-14	1.26e-11
DDR1_cg11676038	MAG_cg02127209	Myelin	0.89	7.69e-11	4.57e-09
DDR1_cg12669395	MAG_cg02127209	Myelin	0.86	1.87e-09	7.34e-08
DDR1_cg13329862	MAG_cg02127209	Myelin	0.87	1.42e-09	5.75e-08
DDR1_cg13351860	MAG_cg02127209	Myelin	0.89	1.81e-10	9.5e-09
DDR1_cg14790552	MAG_cg02127209	Myelin	0.9	2.09e-11	1.49e-09
DDR1_cg15656686	MAG_cg02127209	Myelin	0.83	2.57e-08	7.6e-07
DDR1_cg16111190	MAG_cg02127209	Myelin	0.86	2.67e-09	1e-07
DDR1_cg16797094	MAG_cg02127209	Myelin	0.92	3.6e-12	3.37e-10
DDR1_cg17176005	MAG_cg02127209	Myelin	0.83	2.22e-08	6.67e-07
DDR1_cg17604312	MAG_cg02127209	Myelin	0.79	3.74e-07	8.58e-06
DDR1_cg19215110	MAG_cg02127209	Myelin	0.77	8.03e-07	1.7e-05
DDR1_cg21677258	MAG_cg02127209	Myelin	0.93	5.08e-13	6.78e-11
DDR1_cg24636809	MAG_cg02127209	Myelin	0.85	7.02e-09	2.39e-07
DDR1_cg24727290	MAG_cg02127209	Myelin	0.79	4.19e-07	9.49e-06
DDR1_cg25613385	MAG_cg02127209	Myelin	0.76	1.6e-06	3.14e-05
DDR1_cg25655106	MAG_cg02127209	Myelin	0.89	6.06e-11	3.72e-09
DDR1_cg27237814	MAG_cg02127209	Myelin	0.91	1.4e-11	1.06e-09
DDR1_cg27593250	MAG_cg02127209	Myelin	0.75	2.25e-06	4.24e-05
DDR1_cg01936707	MAG_cg04169912	Myelin	0.79	4.43e-07	9.98e-06
DDR1_cg07912416	MAG_cg04169912	Myelin	0.82	5.34e-08	1.47e-06
DDR1_cg07979747	MAG_cg04169912	Myelin	0.86	2.45e-09	9.27e-08
DDR1_cg08673763	MAG_cg04169912	Myelin	0.79	3.74e-07	8.58e-06
DDR1_cg08951271	MAG_cg04169912	Myelin	0.82	6.74e-08	1.82e-06
DDR1_cg11530564	MAG_cg04169912	Myelin	0.79	2.81e-07	6.62e-06
DDR1_cg11676038	MAG_cg04169912	Myelin	0.78	7.83e-07	1.66e-05
DDR1_cg12669395	MAG_cg04169912	Myelin	0.86	3.32e-09	1.22e-07
DDR1_cg13329862	MAG_cg04169912	Myelin	0.76	2.04e-06	3.9e-05
DDR1_cg14790552	MAG_cg04169912	Myelin	0.75	2.47e-06	4.61e-05
DDR1_cg15656686	MAG_cg04169912	Myelin	0.79	4.19e-07	9.49e-06
DDR1_cg17604312	MAG_cg04169912	Myelin	0.78	7.62e-07	1.62e-05
DDR1_cg18577693	MAG_cg04169912	Myelin	0.76	1.38e-06	2.76e-05
DDR1_cg19215110	MAG_cg04169912	Myelin	0.76	1.85e-06	3.58e-05
DDR1_cg21677258	MAG_cg04169912	Myelin	0.86	3.32e-09	1.22e-07
DDR1_cg24636809	MAG_cg04169912	Myelin	0.8	2.42e-07	5.8e-06
DDR1_cg24727290	MAG_cg04169912	Myelin	0.75	2.36e-06	4.42e-05
DDR1_cg25655106	MAG_cg04169912	Myelin	0.87	1.42e-09	5.75e-08
DDR1_cg27237814	MAG_cg04169912	Myelin	0.75	3.05e-06	5.55e-05
DDR1_cg00466425	MAG_cg05055150	Myelin	0.93	6.61e-13	8.36e-11
DDR1_cg01598675	MAG_cg05055150	Myelin	0.76	1.56e-06	3.07e-05
DDR1_cg01936707	MAG_cg05055150	Myelin	0.92	2.86e-12	2.79e-10
DDR1_cg05703744	MAG_cg05055150	Myelin	0.93	6.06e-13	7.8e-11
DDR1_cg06200824	MAG_cg05055150	Myelin	0.87	9.31e-10	3.96e-08
DDR1_cg06501109	MAG_cg05055150	Myelin	0.87	9.77e-10	4.12e-08
DDR1_cg07908039	MAG_cg05055150	Myelin	0.8	1.97e-07	4.8e-06
DDR1_cg07912416	MAG_cg05055150	Myelin	0.88	4.01e-10	1.9e-08
DDR1_cg07979747	MAG_cg05055150	Myelin	0.89	9.72e-11	5.55e-09
DDR1_cg08673763	MAG_cg05055150	Myelin	0.89	8.65e-11	5.05e-09
DDR1_cg08951271	MAG_cg05055150	Myelin	0.94	4.51e-14	9.9e-12
DDR1_cg09965419	MAG_cg05055150	Myelin	0.78	4.94e-07	1.1e-05
DDR1_cg11530564	MAG_cg05055150	Myelin	0.92	3.6e-12	3.37e-10
DDR1_cg11676038	MAG_cg05055150	Myelin	0.96	2.22e-16	2.02e-13
DDR1_cg12669395	MAG_cg05055150	Myelin	0.95	9.33e-15	2.95e-12
DDR1_cg12847793	MAG_cg05055150	Myelin	0.76	1.56e-06	3.07e-05
DDR1_cg13329862	MAG_cg05055150	Myelin	0.93	1.68e-13	2.75e-11
DDR1_cg13351860	MAG_cg05055150	Myelin	0.91	4.18e-12	3.82e-10
DDR1_cg14058861	MAG_cg05055150	Myelin	0.78	5.52e-07	1.22e-05
DDR1_cg14790552	MAG_cg05055150	Myelin	0.88	2.01e-10	1.05e-08
DDR1_cg15656686	MAG_cg05055150	Myelin	0.87	7.68e-10	3.34e-08
DDR1_cg15720085	MAG_cg05055150	Myelin	0.8	1.69e-07	4.19e-06
DDR1_cg16111190	MAG_cg05055150	Myelin	0.91	3.88e-12	3.59e-10
DDR1_cg16797094	MAG_cg05055150	Myelin	0.89	1.81e-10	9.5e-09
DDR1_cg17176005	MAG_cg05055150	Myelin	0.84	1.47e-08	4.63e-07
DDR1_cg17604312	MAG_cg05055150	Myelin	0.85	7.31e-09	2.47e-07
DDR1_cg18577693	MAG_cg05055150	Myelin	0.81	9.96e-08	2.59e-06
DDR1_cg19215110	MAG_cg05055150	Myelin	0.81	9.96e-08	2.59e-06
DDR1_cg19591099	MAG_cg05055150	Myelin	0.88	2.37e-10	1.2e-08
DDR1_cg21677258	MAG_cg05055150	Myelin	0.93	1.39e-13	2.37e-11
DDR1_cg24566261	MAG_cg05055150	Myelin	0.79	3.96e-07	9.02e-06
DDR1_cg24636809	MAG_cg05055150	Myelin	0.94	4.51e-14	9.9e-12
DDR1_cg24727290	MAG_cg05055150	Myelin	0.87	5.43e-10	2.47e-08
DDR1_cg25613385	MAG_cg05055150	Myelin	0.77	1.25e-06	2.52e-05
DDR1_cg25655106	MAG_cg05055150	Myelin	0.92	9.29e-13	1.11e-10
DDR1_cg27237814	MAG_cg05055150	Myelin	0.88	3.26e-10	1.59e-08
DDR1_cg27593250	MAG_cg05055150	Myelin	0.84	9.65e-09	3.17e-07
DDR1_cg08913013	MAG_cg05327744	Myelin	0.75	2.3e-06	4.33e-05
DDR1_cg11676038	MAG_cg05327744	Myelin	0.79	4.07e-07	9.25e-06
DDR1_cg12669395	MAG_cg05327744	Myelin	0.75	3.51e-06	6.27e-05
DDR1_cg14790552	MAG_cg05327744	Myelin	0.77	1.18e-06	2.41e-05
DDR1_cg16111190	MAG_cg05327744	Myelin	0.77	1.28e-06	2.58e-05
DDR1_cg00466425	MAG_cg05663558	Myelin	0.92	1.41e-12	1.55e-10
DDR1_cg01598675	MAG_cg05663558	Myelin	0.78	6.49e-07	1.41e-05
DDR1_cg01936707	MAG_cg05663558	Myelin	0.93	6.06e-13	7.8e-11
DDR1_cg05703744	MAG_cg05663558	Myelin	0.89	1.29e-10	7.09e-09
DDR1_cg06200824	MAG_cg05663558	Myelin	0.88	2.01e-10	1.05e-08
DDR1_cg06501109	MAG_cg05663558	Myelin	0.84	1.65e-08	5.13e-07
DDR1_cg07908039	MAG_cg05663558	Myelin	0.78	5.37e-07	1.19e-05
DDR1_cg07912416	MAG_cg05663558	Myelin	0.86	1.79e-09	7.04e-08
DDR1_cg07979747	MAG_cg05663558	Myelin	0.87	1.24e-09	5.08e-08
DDR1_cg08673763	MAG_cg05663558	Myelin	0.85	5.97e-09	2.06e-07
DDR1_cg08951271	MAG_cg05663558	Myelin	0.89	9.17e-11	5.29e-09
DDR1_cg09965419	MAG_cg05663558	Myelin	0.76	2.14e-06	4.06e-05
DDR1_cg11530564	MAG_cg05663558	Myelin	0.88	4.44e-10	2.07e-08
DDR1_cg11676038	MAG_cg05663558	Myelin	0.89	1.03e-10	5.83e-09
DDR1_cg12669395	MAG_cg05663558	Myelin	0.93	7.2e-13	8.96e-11
DDR1_cg13329862	MAG_cg05663558	Myelin	0.88	2.93e-10	1.45e-08
DDR1_cg13351860	MAG_cg05663558	Myelin	0.87	1.3e-09	5.3e-08
DDR1_cg14058861	MAG_cg05663558	Myelin	0.77	1.07e-06	2.2e-05
DDR1_cg14790552	MAG_cg05663558	Myelin	0.83	1.78e-08	5.48e-07
DDR1_cg15656686	MAG_cg05663558	Myelin	0.87	8.46e-10	3.63e-08
DDR1_cg15720085	MAG_cg05663558	Myelin	0.82	6.1e-08	1.67e-06
DDR1_cg16111190	MAG_cg05663558	Myelin	0.9	2.09e-11	1.49e-09
DDR1_cg16797094	MAG_cg05663558	Myelin	0.81	9.96e-08	2.59e-06
DDR1_cg17176005	MAG_cg05663558	Myelin	0.77	1.02e-06	2.1e-05
DDR1_cg17604312	MAG_cg05663558	Myelin	0.83	2.76e-08	8.11e-07
DDR1_cg18577693	MAG_cg05663558	Myelin	0.76	1.56e-06	3.07e-05
DDR1_cg19591099	MAG_cg05663558	Myelin	0.86	3.18e-09	1.17e-07
DDR1_cg21677258	MAG_cg05663558	Myelin	0.91	1.5e-11	1.13e-09
DDR1_cg24636809	MAG_cg05663558	Myelin	0.89	6.83e-11	4.13e-09
DDR1_cg24727290	MAG_cg05663558	Myelin	0.83	1.78e-08	5.48e-07
DDR1_cg25655106	MAG_cg05663558	Myelin	0.91	4.85e-12	4.35e-10
DDR1_cg27237814	MAG_cg05663558	Myelin	0.82	5.34e-08	1.47e-06
DDR1_cg27593250	MAG_cg05663558	Myelin	0.8	2.42e-07	5.8e-06
DDR1_cg07912416	MAG_cg07918620	Myelin	0.84	1.59e-08	4.96e-07
DDR1_cg07979747	MAG_cg07918620	Myelin	0.83	1.92e-08	5.86e-07
DDR1_cg08673763	MAG_cg07918620	Myelin	0.82	4.99e-08	1.39e-06
DDR1_cg08951271	MAG_cg07918620	Myelin	0.78	4.81e-07	1.07e-05
DDR1_cg12669395	MAG_cg07918620	Myelin	0.75	2.78e-06	5.11e-05
DDR1_cg13329862	MAG_cg07918620	Myelin	0.77	1.25e-06	2.52e-05
DDR1_cg14790552	MAG_cg07918620	Myelin	0.76	1.49e-06	2.95e-05
DDR1_cg16111190	MAG_cg07918620	Myelin	0.79	3.15e-07	7.35e-06
DDR1_cg17176005	MAG_cg07918620	Myelin	0.83	2.57e-08	7.6e-07
DDR1_cg18577693	MAG_cg07918620	Myelin	0.75	2.78e-06	5.11e-05
DDR1_cg19215110	MAG_cg07918620	Myelin	0.79	4.07e-07	9.25e-06
DDR1_cg21677258	MAG_cg07918620	Myelin	0.86	1.49e-09	5.99e-08
DDR1_cg24636809	MAG_cg07918620	Myelin	0.77	1.25e-06	2.52e-05
DDR1_cg24727290	MAG_cg07918620	Myelin	0.76	1.68e-06	3.28e-05
DDR1_cg25655106	MAG_cg07918620	Myelin	0.77	8.92e-07	1.87e-05
DDR1_cg00466425	MAG_cg08585489	Myelin	0.93	7.2e-13	8.96e-11
DDR1_cg00934322	MAG_cg08585489	Myelin	0.75	3.05e-06	5.55e-05
DDR1_cg01598675	MAG_cg08585489	Myelin	0.8	2.15e-07	5.2e-06
DDR1_cg01936707	MAG_cg08585489	Myelin	0.89	8.65e-11	5.05e-09
DDR1_cg05703744	MAG_cg08585489	Myelin	0.94	2.93e-14	7.05e-12
DDR1_cg06200824	MAG_cg08585489	Myelin	0.81	9.96e-08	2.59e-06
DDR1_cg06501109	MAG_cg08585489	Myelin	0.85	4.28e-09	1.53e-07
DDR1_cg07908039	MAG_cg08585489	Myelin	0.78	7.42e-07	1.59e-05
DDR1_cg07912416	MAG_cg08585489	Myelin	0.88	3.43e-10	1.66e-08
DDR1_cg07979747	MAG_cg08585489	Myelin	0.89	7.69e-11	4.57e-09
DDR1_cg08673763	MAG_cg08585489	Myelin	0.92	1.01e-12	1.19e-10
DDR1_cg08951271	MAG_cg08585489	Myelin	0.93	5.55e-13	7.29e-11
DDR1_cg09822812	MAG_cg08585489	Myelin	0.78	6.15e-07	1.34e-05
DDR1_cg09965419	MAG_cg08585489	Myelin	0.81	7.95e-08	2.11e-06
DDR1_cg11530564	MAG_cg08585489	Myelin	0.91	1.4e-11	1.06e-09
DDR1_cg11676038	MAG_cg08585489	Myelin	0.93	2.46e-13	3.73e-11
DDR1_cg12669395	MAG_cg08585489	Myelin	0.95	9.33e-15	2.95e-12
DDR1_cg12847793	MAG_cg08585489	Myelin	0.78	6.85e-07	1.48e-05
DDR1_cg13329862	MAG_cg08585489	Myelin	0.94	1.47e-14	4.13e-12
DDR1_cg13351860	MAG_cg08585489	Myelin	0.92	1.19e-12	1.36e-10
DDR1_cg14058861	MAG_cg08585489	Myelin	0.8	1.91e-07	4.67e-06
DDR1_cg14790552	MAG_cg08585489	Myelin	0.88	2.93e-10	1.45e-08
DDR1_cg15656686	MAG_cg08585489	Myelin	0.87	8.46e-10	3.63e-08
DDR1_cg15720085	MAG_cg08585489	Myelin	0.78	7.62e-07	1.62e-05
DDR1_cg16111190	MAG_cg08585489	Myelin	0.89	1.81e-10	9.5e-09
DDR1_cg16797094	MAG_cg08585489	Myelin	0.88	2.5e-10	1.26e-08
DDR1_cg17176005	MAG_cg08585489	Myelin	0.83	1.92e-08	5.86e-07
DDR1_cg17604312	MAG_cg08585489	Myelin	0.87	8.06e-10	3.49e-08
DDR1_cg18577693	MAG_cg08585489	Myelin	0.75	2.53e-06	4.71e-05
DDR1_cg19215110	MAG_cg08585489	Myelin	0.83	3.18e-08	9.22e-07
DDR1_cg19591099	MAG_cg08585489	Myelin	0.86	2.45e-09	9.27e-08
DDR1_cg21677258	MAG_cg08585489	Myelin	0.92	2.1e-12	2.17e-10
DDR1_cg24566261	MAG_cg08585489	Myelin	0.76	1.85e-06	3.58e-05
DDR1_cg24636809	MAG_cg08585489	Myelin	0.93	7.2e-13	8.96e-11
DDR1_cg24727290	MAG_cg08585489	Myelin	0.9	4.47e-11	2.86e-09
DDR1_cg25655106	MAG_cg08585489	Myelin	0.95	9.33e-15	2.95e-12
DDR1_cg27237814	MAG_cg08585489	Myelin	0.89	1.37e-10	7.45e-09
DDR1_cg27593250	MAG_cg08585489	Myelin	0.82	6.74e-08	1.82e-06
DDR1_cg00466425	MAG_cg10618943	Myelin	0.79	3.06e-07	7.17e-06
DDR1_cg00934322	MAG_cg10618943	Myelin	0.75	3.43e-06	6.15e-05
DDR1_cg01936707	MAG_cg10618943	Myelin	0.9	1.83e-11	1.33e-09
DDR1_cg05703744	MAG_cg10618943	Myelin	0.88	2.13e-10	1.1e-08
DDR1_cg06501109	MAG_cg10618943	Myelin	0.75	3.05e-06	5.55e-05
DDR1_cg07908039	MAG_cg10618943	Myelin	0.84	1.65e-08	5.13e-07
DDR1_cg07912416	MAG_cg10618943	Myelin	0.83	1.78e-08	5.48e-07
DDR1_cg07979747	MAG_cg10618943	Myelin	0.83	1.85e-08	5.67e-07
DDR1_cg08673763	MAG_cg10618943	Myelin	0.83	1.85e-08	5.67e-07
DDR1_cg08951271	MAG_cg10618943	Myelin	0.84	1e-08	3.29e-07
DDR1_cg09965419	MAG_cg10618943	Myelin	0.8	1.74e-07	4.31e-06
DDR1_cg11530564	MAG_cg10618943	Myelin	0.92	2.45e-12	2.47e-10
DDR1_cg11676038	MAG_cg10618943	Myelin	0.87	1.18e-09	4.87e-08
DDR1_cg12669395	MAG_cg10618943	Myelin	0.88	3.09e-10	1.52e-08
DDR1_cg13329862	MAG_cg10618943	Myelin	0.82	4.06e-08	1.15e-06
DDR1_cg13351860	MAG_cg10618943	Myelin	0.89	1.29e-10	7.09e-09
DDR1_cg13695585	MAG_cg10618943	Myelin	0.76	1.49e-06	2.95e-05
DDR1_cg14790552	MAG_cg10618943	Myelin	0.86	2.56e-09	9.63e-08
DDR1_cg15656686	MAG_cg10618943	Myelin	0.87	7.31e-10	3.2e-08
DDR1_cg16111190	MAG_cg10618943	Myelin	0.86	2.79e-09	1.04e-07
DDR1_cg16797094	MAG_cg10618943	Myelin	0.91	7.49e-12	6.29e-10
DDR1_cg17176005	MAG_cg10618943	Myelin	0.81	1.36e-07	3.44e-06
DDR1_cg17604312	MAG_cg10618943	Myelin	0.82	5.52e-08	1.52e-06
DDR1_cg21677258	MAG_cg10618943	Myelin	0.9	2.71e-11	1.85e-09
DDR1_cg24566261	MAG_cg10618943	Myelin	0.76	1.9e-06	3.66e-05
DDR1_cg24636809	MAG_cg10618943	Myelin	0.81	1.24e-07	3.16e-06
DDR1_cg25613385	MAG_cg10618943	Myelin	0.75	2.65e-06	4.91e-05
DDR1_cg25655106	MAG_cg10618943	Myelin	0.88	2.64e-10	1.32e-08
DDR1_cg27237814	MAG_cg10618943	Myelin	0.83	2.3e-08	6.9e-07
DDR1_cg27593250	MAG_cg10618943	Myelin	0.75	3.2e-06	5.78e-05
DDR1_cg00466425	MAG_cg11587635	Myelin	0.87	8.88e-10	3.8e-08
DDR1_cg00934322	MAG_cg11587635	Myelin	0.75	2.25e-06	4.24e-05
DDR1_cg01936707	MAG_cg11587635	Myelin	0.92	1.01e-12	1.19e-10
DDR1_cg05703744	MAG_cg11587635	Myelin	0.93	2.46e-13	3.73e-11
DDR1_cg06200824	MAG_cg11587635	Myelin	0.8	2.35e-07	5.65e-06
DDR1_cg06501109	MAG_cg11587635	Myelin	0.82	5.34e-08	1.47e-06
DDR1_cg07908039	MAG_cg11587635	Myelin	0.77	1.15e-06	2.36e-05
DDR1_cg07912416	MAG_cg11587635	Myelin	0.87	6.96e-10	3.06e-08
DDR1_cg07979747	MAG_cg11587635	Myelin	0.87	5.71e-10	2.58e-08
DDR1_cg08673763	MAG_cg11587635	Myelin	0.89	6.83e-11	4.13e-09
DDR1_cg08684361	MAG_cg11587635	Myelin	0.76	1.95e-06	3.73e-05
DDR1_cg08951271	MAG_cg11587635	Myelin	0.93	4.65e-13	6.26e-11
DDR1_cg09965419	MAG_cg11587635	Myelin	0.8	1.54e-07	3.86e-06
DDR1_cg11530564	MAG_cg11587635	Myelin	0.94	2.33e-14	5.92e-12
DDR1_cg11676038	MAG_cg11587635	Myelin	0.93	3.24e-13	4.65e-11
DDR1_cg12669395	MAG_cg11587635	Myelin	0.92	1.1e-12	1.27e-10
DDR1_cg12847793	MAG_cg11587635	Myelin	0.76	1.95e-06	3.73e-05
DDR1_cg13329862	MAG_cg11587635	Myelin	0.91	1.06e-11	8.47e-10
DDR1_cg13351860	MAG_cg11587635	Myelin	0.94	5.55e-14	1.16e-11
DDR1_cg13695585	MAG_cg11587635	Myelin	0.77	1.04e-06	2.15e-05
DDR1_cg14058861	MAG_cg11587635	Myelin	0.76	1.68e-06	3.28e-05
DDR1_cg14790552	MAG_cg11587635	Myelin	0.89	1.45e-10	7.83e-09
DDR1_cg15656686	MAG_cg11587635	Myelin	0.9	3.71e-11	2.44e-09
DDR1_cg16111190	MAG_cg11587635	Myelin	0.87	1.07e-09	4.49e-08
DDR1_cg16797094	MAG_cg11587635	Myelin	0.94	1.03e-13	1.89e-11
DDR1_cg17176005	MAG_cg11587635	Myelin	0.84	1.71e-08	5.3e-07
DDR1_cg17604312	MAG_cg11587635	Myelin	0.85	6.74e-09	2.3e-07
DDR1_cg19215110	MAG_cg11587635	Myelin	0.82	5.34e-08	1.47e-06
DDR1_cg19591099	MAG_cg11587635	Myelin	0.79	2.97e-07	6.98e-06
DDR1_cg21677258	MAG_cg11587635	Myelin	0.93	3.55e-13	5.01e-11
DDR1_cg24636809	MAG_cg11587635	Myelin	0.89	1.62e-10	8.64e-09
DDR1_cg24727290	MAG_cg11587635	Myelin	0.86	2.79e-09	1.04e-07
DDR1_cg25613385	MAG_cg11587635	Myelin	0.78	5.99e-07	1.31e-05
DDR1_cg25655106	MAG_cg11587635	Myelin	0.93	2.04e-13	3.19e-11
DDR1_cg27237814	MAG_cg11587635	Myelin	0.9	3.95e-11	2.57e-09
DDR1_cg27593250	MAG_cg11587635	Myelin	0.78	7.23e-07	1.55e-05
DDR1_cg00466425	MAG_cg11902728	Myelin	0.87	9.31e-10	3.96e-08
DDR1_cg01936707	MAG_cg11902728	Myelin	0.88	2.5e-10	1.26e-08
DDR1_cg05703744	MAG_cg11902728	Myelin	0.89	6.83e-11	4.13e-09
DDR1_cg06200824	MAG_cg11902728	Myelin	0.79	4.07e-07	9.25e-06
DDR1_cg06501109	MAG_cg11902728	Myelin	0.84	1.13e-08	3.65e-07
DDR1_cg07912416	MAG_cg11902728	Myelin	0.83	2.39e-08	7.13e-07
DDR1_cg07979747	MAG_cg11902728	Myelin	0.9	5.71e-11	3.53e-09
DDR1_cg08673763	MAG_cg11902728	Myelin	0.86	2.56e-09	9.63e-08
DDR1_cg08684361	MAG_cg11902728	Myelin	0.76	1.6e-06	3.14e-05
DDR1_cg08951271	MAG_cg11902728	Myelin	0.93	3.55e-13	5.01e-11
DDR1_cg11530564	MAG_cg11902728	Myelin	0.89	6.06e-11	3.72e-09
DDR1_cg11676038	MAG_cg11902728	Myelin	0.95	4.88e-15	1.86e-12
DDR1_cg12669395	MAG_cg11902728	Myelin	0.9	4.76e-11	3.02e-09
DDR1_cg12847793	MAG_cg11902728	Myelin	0.78	5.08e-07	1.13e-05
DDR1_cg13329862	MAG_cg11902728	Myelin	0.9	1.71e-11	1.26e-09
DDR1_cg13351860	MAG_cg11902728	Myelin	0.86	1.71e-09	6.76e-08
DDR1_cg14058861	MAG_cg11902728	Myelin	0.75	2.78e-06	5.11e-05
DDR1_cg14790552	MAG_cg11902728	Myelin	0.84	1.09e-08	3.52e-07
DDR1_cg15656686	MAG_cg11902728	Myelin	0.8	1.91e-07	4.67e-06
DDR1_cg16111190	MAG_cg11902728	Myelin	0.84	9.28e-09	3.06e-07
DDR1_cg16797094	MAG_cg11902728	Myelin	0.89	1.81e-10	9.5e-09
DDR1_cg17176005	MAG_cg11902728	Myelin	0.81	7.44e-08	1.99e-06
DDR1_cg17604312	MAG_cg11902728	Myelin	0.85	5.73e-09	1.99e-07
DDR1_cg18577693	MAG_cg11902728	Myelin	0.76	1.49e-06	2.95e-05
DDR1_cg19215110	MAG_cg11902728	Myelin	0.86	2.05e-09	7.94e-08
DDR1_cg19591099	MAG_cg11902728	Myelin	0.82	4.06e-08	1.15e-06
DDR1_cg21677258	MAG_cg11902728	Myelin	0.9	3.71e-11	2.44e-09
DDR1_cg24636809	MAG_cg11902728	Myelin	0.91	1.4e-11	1.06e-09
DDR1_cg24727290	MAG_cg11902728	Myelin	0.88	2.78e-10	1.39e-08
DDR1_cg25655106	MAG_cg11902728	Myelin	0.89	6.83e-11	4.13e-09
DDR1_cg27237814	MAG_cg11902728	Myelin	0.85	6.74e-09	2.3e-07
DDR1_cg27593250	MAG_cg11902728	Myelin	0.77	9.16e-07	1.91e-05
DDR1_cg00466425	MAG_cg12402033	Myelin	0.9	1.6e-11	1.19e-09
DDR1_cg01936707	MAG_cg12402033	Myelin	0.92	1.01e-12	1.19e-10
DDR1_cg05703744	MAG_cg12402033	Myelin	0.92	2.65e-12	2.64e-10
DDR1_cg06200824	MAG_cg12402033	Myelin	0.81	9.96e-08	2.59e-06
DDR1_cg06501109	MAG_cg12402033	Myelin	0.83	1.78e-08	5.48e-07
DDR1_cg07908039	MAG_cg12402033	Myelin	0.78	6.67e-07	1.44e-05
DDR1_cg07912416	MAG_cg12402033	Myelin	0.89	7.69e-11	4.57e-09
DDR1_cg07979747	MAG_cg12402033	Myelin	0.9	4.47e-11	2.86e-09
DDR1_cg08673763	MAG_cg12402033	Myelin	0.89	1.81e-10	9.5e-09
DDR1_cg08684361	MAG_cg12402033	Myelin	0.76	1.45e-06	2.88e-05
DDR1_cg08951271	MAG_cg12402033	Myelin	0.93	1.14e-13	2.04e-11
DDR1_cg09822812	MAG_cg12402033	Myelin	0.75	3.51e-06	6.27e-05
DDR1_cg09965419	MAG_cg12402033	Myelin	0.76	1.41e-06	2.82e-05
DDR1_cg11530564	MAG_cg12402033	Myelin	0.93	5.08e-13	6.78e-11
DDR1_cg11676038	MAG_cg12402033	Myelin	0.94	3.24e-14	7.65e-12
DDR1_cg12669395	MAG_cg12402033	Myelin	0.93	6.06e-13	7.8e-11
DDR1_cg13329862	MAG_cg12402033	Myelin	0.93	3.24e-13	4.65e-11
DDR1_cg13351860	MAG_cg12402033	Myelin	0.92	2.86e-12	2.79e-10
DDR1_cg14058861	MAG_cg12402033	Myelin	0.79	3.96e-07	9.02e-06
DDR1_cg14790552	MAG_cg12402033	Myelin	0.85	6.48e-09	2.22e-07
DDR1_cg15656686	MAG_cg12402033	Myelin	0.87	6.31e-10	2.82e-08
DDR1_cg15720085	MAG_cg12402033	Myelin	0.77	1.31e-06	2.64e-05
DDR1_cg16111190	MAG_cg12402033	Myelin	0.9	4.21e-11	2.72e-09
DDR1_cg16797094	MAG_cg12402033	Myelin	0.91	1.5e-11	1.13e-09
DDR1_cg17176005	MAG_cg12402033	Myelin	0.81	1.1e-07	2.82e-06
DDR1_cg17604312	MAG_cg12402033	Myelin	0.86	2.79e-09	1.04e-07
DDR1_cg18577693	MAG_cg12402033	Myelin	0.76	1.77e-06	3.43e-05
DDR1_cg19215110	MAG_cg12402033	Myelin	0.83	3.29e-08	9.53e-07
DDR1_cg19591099	MAG_cg12402033	Myelin	0.84	1.47e-08	4.63e-07
DDR1_cg21677258	MAG_cg12402033	Myelin	0.93	2.96e-13	4.31e-11
DDR1_cg24636809	MAG_cg12402033	Myelin	0.94	6.84e-14	1.37e-11
DDR1_cg24727290	MAG_cg12402033	Myelin	0.89	1.03e-10	5.83e-09
DDR1_cg25613385	MAG_cg12402033	Myelin	0.79	2.73e-07	6.44e-06
DDR1_cg25655106	MAG_cg12402033	Myelin	0.94	4.04e-14	9.1e-12
DDR1_cg27237814	MAG_cg12402033	Myelin	0.87	9.31e-10	3.96e-08
DDR1_cg27593250	MAG_cg12402033	Myelin	0.79	3.85e-07	8.81e-06
DDR1_cg00466425	MAG_cg13993734	Myelin	0.89	1.29e-10	7.09e-09
DDR1_cg01598675	MAG_cg13993734	Myelin	0.82	4.2e-08	1.19e-06
DDR1_cg01936707	MAG_cg13993734	Myelin	0.83	2.96e-08	8.66e-07
DDR1_cg05703744	MAG_cg13993734	Myelin	0.88	3.61e-10	1.73e-08
DDR1_cg06200824	MAG_cg13993734	Myelin	0.81	1.2e-07	3.07e-06
DDR1_cg06501109	MAG_cg13993734	Myelin	0.79	4.19e-07	9.49e-06
DDR1_cg07912416	MAG_cg13993734	Myelin	0.85	4.28e-09	1.53e-07
DDR1_cg07979747	MAG_cg13993734	Myelin	0.87	1.02e-09	4.31e-08
DDR1_cg08673763	MAG_cg13993734	Myelin	0.89	1.81e-10	9.5e-09
DDR1_cg08951271	MAG_cg13993734	Myelin	0.92	2.27e-12	2.31e-10
DDR1_cg09810078	MAG_cg13993734	Myelin	0.76	1.77e-06	3.43e-05
DDR1_cg09965419	MAG_cg13993734	Myelin	0.78	7.62e-07	1.62e-05
DDR1_cg11530564	MAG_cg13993734	Myelin	0.85	5.06e-09	1.78e-07
DDR1_cg11676038	MAG_cg13993734	Myelin	0.86	2.45e-09	9.27e-08
DDR1_cg12669395	MAG_cg13993734	Myelin	0.89	6.83e-11	4.13e-09
DDR1_cg12847793	MAG_cg13993734	Myelin	0.79	4.43e-07	9.98e-06
DDR1_cg13329862	MAG_cg13993734	Myelin	0.94	6.17e-14	1.26e-11
DDR1_cg13351860	MAG_cg13993734	Myelin	0.92	1.94e-12	2.03e-10
DDR1_cg14790552	MAG_cg13993734	Myelin	0.86	1.87e-09	7.34e-08
DDR1_cg15656686	MAG_cg13993734	Myelin	0.86	1.49e-09	5.99e-08
DDR1_cg15720085	MAG_cg13993734	Myelin	0.8	2.42e-07	5.8e-06
DDR1_cg16111190	MAG_cg13993734	Myelin	0.87	1.36e-09	5.52e-08
DDR1_cg16797094	MAG_cg13993734	Myelin	0.85	4.11e-09	1.48e-07
DDR1_cg17176005	MAG_cg13993734	Myelin	0.84	8.92e-09	2.96e-07
DDR1_cg17604312	MAG_cg13993734	Myelin	0.78	6.15e-07	1.34e-05
DDR1_cg18577693	MAG_cg13993734	Myelin	0.77	9.4e-07	1.96e-05
DDR1_cg19215110	MAG_cg13993734	Myelin	0.84	1.42e-08	4.48e-07
DDR1_cg19591099	MAG_cg13993734	Myelin	0.8	1.45e-07	3.64e-06
DDR1_cg20955507	MAG_cg13993734	Myelin	0.77	1.22e-06	2.47e-05
DDR1_cg21677258	MAG_cg13993734	Myelin	0.88	2.01e-10	1.05e-08
DDR1_cg24636809	MAG_cg13993734	Myelin	0.87	9.31e-10	3.96e-08
DDR1_cg24727290	MAG_cg13993734	Myelin	0.86	1.56e-09	6.24e-08
DDR1_cg25655106	MAG_cg13993734	Myelin	0.87	5.43e-10	2.47e-08
DDR1_cg27237814	MAG_cg13993734	Myelin	0.92	1.3e-12	1.46e-10
DDR1_cg27593250	MAG_cg13993734	Myelin	0.77	8.25e-07	1.74e-05
DDR1_cg00466425	MAG_cg14535518	Myelin	0.93	2.46e-13	3.73e-11
DDR1_cg00934322	MAG_cg14535518	Myelin	0.75	3.27e-06	5.9e-05
DDR1_cg01936707	MAG_cg14535518	Myelin	0.91	1.4e-11	1.06e-09
DDR1_cg05703744	MAG_cg14535518	Myelin	0.92	3.09e-12	2.96e-10
DDR1_cg06200824	MAG_cg14535518	Myelin	0.9	4.21e-11	2.72e-09
DDR1_cg06501109	MAG_cg14535518	Myelin	0.81	8.21e-08	2.18e-06
DDR1_cg07908039	MAG_cg14535518	Myelin	0.76	1.56e-06	3.07e-05
DDR1_cg07912416	MAG_cg14535518	Myelin	0.88	2.13e-10	1.1e-08
DDR1_cg07979747	MAG_cg14535518	Myelin	0.89	9.72e-11	5.55e-09
DDR1_cg08673763	MAG_cg14535518	Myelin	0.86	2.79e-09	1.04e-07
DDR1_cg08951271	MAG_cg14535518	Myelin	0.92	1.65e-12	1.78e-10
DDR1_cg09965419	MAG_cg14535518	Myelin	0.79	2.81e-07	6.62e-06
DDR1_cg11530564	MAG_cg14535518	Myelin	0.87	1.18e-09	4.87e-08
DDR1_cg11676038	MAG_cg14535518	Myelin	0.95	3.33e-15	1.4e-12
DDR1_cg12669395	MAG_cg14535518	Myelin	0.92	3.09e-12	2.96e-10
DDR1_cg12847793	MAG_cg14535518	Myelin	0.75	2.78e-06	5.11e-05
DDR1_cg13329862	MAG_cg14535518	Myelin	0.92	2.1e-12	2.17e-10
DDR1_cg13351860	MAG_cg14535518	Myelin	0.91	9.26e-12	7.51e-10
DDR1_cg14058861	MAG_cg14535518	Myelin	0.83	2.86e-08	8.38e-07
DDR1_cg14790552	MAG_cg14535518	Myelin	0.84	1.17e-08	3.77e-07
DDR1_cg15656686	MAG_cg14535518	Myelin	0.88	4.01e-10	1.9e-08
DDR1_cg15720085	MAG_cg14535518	Myelin	0.8	2.15e-07	5.2e-06
DDR1_cg16111190	MAG_cg14535518	Myelin	0.88	2.24e-10	1.15e-08
DDR1_cg16797094	MAG_cg14535518	Myelin	0.86	3.04e-09	1.13e-07
DDR1_cg17176005	MAG_cg14535518	Myelin	0.81	1.06e-07	2.74e-06
DDR1_cg17604312	MAG_cg14535518	Myelin	0.81	9.96e-08	2.59e-06
DDR1_cg18577693	MAG_cg14535518	Myelin	0.8	2.42e-07	5.8e-06
DDR1_cg19215110	MAG_cg14535518	Myelin	0.8	1.74e-07	4.31e-06
DDR1_cg19591099	MAG_cg14535518	Myelin	0.92	3.09e-12	2.96e-10
DDR1_cg21677258	MAG_cg14535518	Myelin	0.9	1.95e-11	1.41e-09
DDR1_cg24566261	MAG_cg14535518	Myelin	0.83	3.66e-08	1.05e-06
DDR1_cg24636809	MAG_cg14535518	Myelin	0.91	1.4e-11	1.06e-09
DDR1_cg24727290	MAG_cg14535518	Myelin	0.87	1.24e-09	5.08e-08
DDR1_cg25655106	MAG_cg14535518	Myelin	0.89	1.15e-10	6.43e-09
DDR1_cg27237814	MAG_cg14535518	Myelin	0.87	6.31e-10	2.82e-08
DDR1_cg27593250	MAG_cg14535518	Myelin	0.84	1.59e-08	4.96e-07
DDR1_cg00466425	MAG_cg14952359	Myelin	0.75	2.65e-06	4.91e-05
DDR1_cg01936707	MAG_cg14952359	Myelin	0.77	1.13e-06	2.3e-05
DDR1_cg05703744	MAG_cg14952359	Myelin	0.8	1.85e-07	4.55e-06
DDR1_cg06200824	MAG_cg14952359	Myelin	0.75	2.85e-06	5.22e-05
DDR1_cg06501109	MAG_cg14952359	Myelin	0.75	3.2e-06	5.78e-05
DDR1_cg07912416	MAG_cg14952359	Myelin	0.86	2.14e-09	8.25e-08
DDR1_cg07979747	MAG_cg14952359	Myelin	0.85	4.11e-09	1.48e-07
DDR1_cg08673763	MAG_cg14952359	Myelin	0.86	2.56e-09	9.63e-08
DDR1_cg08951271	MAG_cg14952359	Myelin	0.84	1.13e-08	3.65e-07
DDR1_cg11530564	MAG_cg14952359	Myelin	0.85	6.48e-09	2.22e-07
DDR1_cg11676038	MAG_cg14952359	Myelin	0.81	9.05e-08	2.38e-06
DDR1_cg12669395	MAG_cg14952359	Myelin	0.87	5.43e-10	2.47e-08
DDR1_cg13329862	MAG_cg14952359	Myelin	0.8	2.5e-07	5.95e-06
DDR1_cg13351860	MAG_cg14952359	Myelin	0.83	3.53e-08	1.02e-06
DDR1_cg14058861	MAG_cg14952359	Myelin	0.77	1.31e-06	2.64e-05
DDR1_cg14790552	MAG_cg14952359	Myelin	0.84	8.92e-09	2.96e-07
DDR1_cg15656686	MAG_cg14952359	Myelin	0.82	7.2e-08	1.94e-06
DDR1_cg16111190	MAG_cg14952359	Myelin	0.8	2.09e-07	5.07e-06
DDR1_cg16797094	MAG_cg14952359	Myelin	0.78	7.23e-07	1.55e-05
DDR1_cg17176005	MAG_cg14952359	Myelin	0.81	9.34e-08	2.45e-06
DDR1_cg17604312	MAG_cg14952359	Myelin	0.75	3.27e-06	5.9e-05
DDR1_cg18577693	MAG_cg14952359	Myelin	0.79	4.3e-07	9.73e-06
DDR1_cg21677258	MAG_cg14952359	Myelin	0.9	3.71e-11	2.44e-09
DDR1_cg24636809	MAG_cg14952359	Myelin	0.83	2.86e-08	8.38e-07
DDR1_cg24727290	MAG_cg14952359	Myelin	0.78	5.99e-07	1.31e-05
DDR1_cg25613385	MAG_cg14952359	Myelin	0.75	2.78e-06	5.11e-05
DDR1_cg25655106	MAG_cg14952359	Myelin	0.88	4.91e-10	2.26e-08
DDR1_cg27237814	MAG_cg14952359	Myelin	0.78	4.68e-07	1.05e-05
DDR1_cg00466425	MAG_cg15005368	Myelin	0.9	1.95e-11	1.41e-09
DDR1_cg01936707	MAG_cg15005368	Myelin	0.88	4.91e-10	2.26e-08
DDR1_cg05703744	MAG_cg15005368	Myelin	0.87	6.31e-10	2.82e-08
DDR1_cg06200824	MAG_cg15005368	Myelin	0.78	5.99e-07	1.31e-05
DDR1_cg06501109	MAG_cg15005368	Myelin	0.82	6.31e-08	1.72e-06
DDR1_cg07912416	MAG_cg15005368	Myelin	0.81	9.05e-08	2.38e-06
DDR1_cg07979747	MAG_cg15005368	Myelin	0.81	9.96e-08	2.59e-06
DDR1_cg08673763	MAG_cg15005368	Myelin	0.78	4.68e-07	1.05e-05
DDR1_cg08684361	MAG_cg15005368	Myelin	0.75	3.35e-06	6.02e-05
DDR1_cg08951271	MAG_cg15005368	Myelin	0.86	2.67e-09	1e-07
DDR1_cg09965419	MAG_cg15005368	Myelin	0.75	2.98e-06	5.43e-05
DDR1_cg11530564	MAG_cg15005368	Myelin	0.88	3.81e-10	1.82e-08
DDR1_cg11676038	MAG_cg15005368	Myelin	0.87	5.71e-10	2.58e-08
DDR1_cg12669395	MAG_cg15005368	Myelin	0.88	2.5e-10	1.26e-08
DDR1_cg13329862	MAG_cg15005368	Myelin	0.83	2.14e-08	6.46e-07
DDR1_cg13351860	MAG_cg15005368	Myelin	0.88	4.44e-10	2.07e-08
DDR1_cg14790552	MAG_cg15005368	Myelin	0.82	4.35e-08	1.23e-06
DDR1_cg15656686	MAG_cg15005368	Myelin	0.86	3.46e-09	1.27e-07
DDR1_cg15720085	MAG_cg15005368	Myelin	0.78	5.52e-07	1.22e-05
DDR1_cg16111190	MAG_cg15005368	Myelin	0.79	2.97e-07	6.98e-06
DDR1_cg16797094	MAG_cg15005368	Myelin	0.83	1.78e-08	5.48e-07
DDR1_cg17604312	MAG_cg15005368	Myelin	0.83	3.66e-08	1.05e-06
DDR1_cg19591099	MAG_cg15005368	Myelin	0.84	1.59e-08	4.96e-07
DDR1_cg21677258	MAG_cg15005368	Myelin	0.84	8.24e-09	2.76e-07
DDR1_cg24636809	MAG_cg15005368	Myelin	0.89	1.45e-10	7.83e-09
DDR1_cg24727290	MAG_cg15005368	Myelin	0.78	5.37e-07	1.19e-05
DDR1_cg25655106	MAG_cg15005368	Myelin	0.89	7.69e-11	4.57e-09
DDR1_cg27237814	MAG_cg15005368	Myelin	0.82	4.2e-08	1.19e-06
DDR1_cg27593250	MAG_cg15005368	Myelin	0.76	1.6e-06	3.14e-05
DDR1_cg00466425	MAG_cg15485216	Myelin	0.85	4.86e-09	1.71e-07
DDR1_cg01936707	MAG_cg15485216	Myelin	0.87	7.31e-10	3.2e-08
DDR1_cg07979747	MAG_cg15485216	Myelin	0.76	1.85e-06	3.58e-05
DDR1_cg08673763	MAG_cg15485216	Myelin	0.79	3.43e-07	7.95e-06
DDR1_cg08951271	MAG_cg15485216	Myelin	0.83	2.14e-08	6.46e-07
DDR1_cg11530564	MAG_cg15485216	Myelin	0.75	2.25e-06	4.24e-05
DDR1_cg11676038	MAG_cg15485216	Myelin	0.88	2.37e-10	1.2e-08
DDR1_cg12669395	MAG_cg15485216	Myelin	0.8	2.57e-07	6.12e-06
DDR1_cg13329862	MAG_cg15485216	Myelin	0.81	8.76e-08	2.31e-06
DDR1_cg13351860	MAG_cg15485216	Myelin	0.79	3.43e-07	7.95e-06
DDR1_cg14058861	MAG_cg15485216	Myelin	0.75	3.2e-06	5.78e-05
DDR1_cg16111190	MAG_cg15485216	Myelin	0.77	9.4e-07	1.96e-05
DDR1_cg19591099	MAG_cg15485216	Myelin	0.82	6.97e-08	1.88e-06
DDR1_cg21677258	MAG_cg15485216	Myelin	0.77	1.07e-06	2.2e-05
DDR1_cg24636809	MAG_cg15485216	Myelin	0.77	8.25e-07	1.74e-05
DDR1_cg24727290	MAG_cg15485216	Myelin	0.77	1.18e-06	2.41e-05
DDR1_cg25655106	MAG_cg15485216	Myelin	0.82	4.06e-08	1.15e-06
DDR1_cg27237814	MAG_cg15485216	Myelin	0.77	8.92e-07	1.87e-05
DDR1_cg27593250	MAG_cg15485216	Myelin	0.76	1.99e-06	3.82e-05
DDR1_cg00466425	MAG_cg15761414	Myelin	0.84	1.27e-08	4.04e-07
DDR1_cg01598675	MAG_cg15761414	Myelin	0.81	1.06e-07	2.74e-06
DDR1_cg01936707	MAG_cg15761414	Myelin	0.84	1.32e-08	4.19e-07
DDR1_cg05703744	MAG_cg15761414	Myelin	0.87	9.77e-10	4.12e-08
DDR1_cg06200824	MAG_cg15761414	Myelin	0.85	6.22e-09	2.14e-07
DDR1_cg07908039	MAG_cg15761414	Myelin	0.84	1.09e-08	3.52e-07
DDR1_cg07912416	MAG_cg15761414	Myelin	0.92	2.86e-12	2.79e-10
DDR1_cg07979747	MAG_cg15761414	Myelin	0.9	3.71e-11	2.44e-09
DDR1_cg08673763	MAG_cg15761414	Myelin	0.89	7.69e-11	4.57e-09
DDR1_cg08951271	MAG_cg15761414	Myelin	0.86	1.49e-09	5.99e-08
DDR1_cg09965419	MAG_cg15761414	Myelin	0.81	1.28e-07	3.25e-06
DDR1_cg11530564	MAG_cg15761414	Myelin	0.88	4.22e-10	1.99e-08
DDR1_cg11676038	MAG_cg15761414	Myelin	0.85	4.47e-09	1.59e-07
DDR1_cg12669395	MAG_cg15761414	Myelin	0.9	2.38e-11	1.66e-09
DDR1_cg13329862	MAG_cg15761414	Myelin	0.87	1.24e-09	5.08e-08
DDR1_cg13351860	MAG_cg15761414	Myelin	0.85	4.86e-09	1.71e-07
DDR1_cg13695585	MAG_cg15761414	Myelin	0.79	4.55e-07	1.02e-05
DDR1_cg14790552	MAG_cg15761414	Myelin	0.85	3.61e-09	1.32e-07
DDR1_cg15656686	MAG_cg15761414	Myelin	0.89	9.17e-11	5.29e-09
DDR1_cg16111190	MAG_cg15761414	Myelin	0.85	3.61e-09	1.32e-07
DDR1_cg16797094	MAG_cg15761414	Myelin	0.86	3.18e-09	1.17e-07
DDR1_cg17176005	MAG_cg15761414	Myelin	0.85	3.94e-09	1.42e-07
DDR1_cg17604312	MAG_cg15761414	Myelin	0.86	2.24e-09	8.58e-08
DDR1_cg18577693	MAG_cg15761414	Myelin	0.76	1.45e-06	2.88e-05
DDR1_cg19215110	MAG_cg15761414	Myelin	0.75	3.51e-06	6.27e-05
DDR1_cg19591099	MAG_cg15761414	Myelin	0.75	2.72e-06	5.01e-05
DDR1_cg21677258	MAG_cg15761414	Myelin	0.95	3.77e-15	1.53e-12
DDR1_cg24566261	MAG_cg15761414	Myelin	0.8	1.54e-07	3.86e-06
DDR1_cg24636809	MAG_cg15761414	Myelin	0.87	6.63e-10	2.93e-08
DDR1_cg24727290	MAG_cg15761414	Myelin	0.8	1.8e-07	4.43e-06
DDR1_cg25655106	MAG_cg15761414	Myelin	0.91	6.04e-12	5.23e-10
DDR1_cg27237814	MAG_cg15761414	Myelin	0.85	3.94e-09	1.42e-07
DDR1_cg00466425	MAG_cg17096126	Myelin	0.92	2.65e-12	2.64e-10
DDR1_cg01936707	MAG_cg17096126	Myelin	0.86	3.18e-09	1.17e-07
DDR1_cg05703744	MAG_cg17096126	Myelin	0.83	1.85e-08	5.67e-07
DDR1_cg06200824	MAG_cg17096126	Myelin	0.81	8.48e-08	2.24e-06
DDR1_cg06501109	MAG_cg17096126	Myelin	0.78	5.08e-07	1.13e-05
DDR1_cg07912416	MAG_cg17096126	Myelin	0.8	1.97e-07	4.8e-06
DDR1_cg07979747	MAG_cg17096126	Myelin	0.76	1.85e-06	3.58e-05
DDR1_cg08673763	MAG_cg17096126	Myelin	0.8	1.85e-07	4.55e-06
DDR1_cg08951271	MAG_cg17096126	Myelin	0.84	1.32e-08	4.19e-07
DDR1_cg11530564	MAG_cg17096126	Myelin	0.82	4.5e-08	1.27e-06
DDR1_cg11676038	MAG_cg17096126	Myelin	0.84	1.22e-08	3.91e-07
DDR1_cg12669395	MAG_cg17096126	Myelin	0.85	5.06e-09	1.78e-07
DDR1_cg13329862	MAG_cg17096126	Myelin	0.84	1.09e-08	3.52e-07
DDR1_cg13351860	MAG_cg17096126	Myelin	0.85	4.28e-09	1.53e-07
DDR1_cg14058861	MAG_cg17096126	Myelin	0.78	6.15e-07	1.34e-05
DDR1_cg14790552	MAG_cg17096126	Myelin	0.77	1.07e-06	2.2e-05
DDR1_cg15656686	MAG_cg17096126	Myelin	0.78	5.67e-07	1.25e-05
DDR1_cg15720085	MAG_cg17096126	Myelin	0.82	6.1e-08	1.67e-06
DDR1_cg16111190	MAG_cg17096126	Myelin	0.87	8.88e-10	3.8e-08
DDR1_cg16797094	MAG_cg17096126	Myelin	0.76	1.77e-06	3.43e-05
DDR1_cg19591099	MAG_cg17096126	Myelin	0.84	1.42e-08	4.48e-07
DDR1_cg21677258	MAG_cg17096126	Myelin	0.82	5.16e-08	1.43e-06
DDR1_cg24636809	MAG_cg17096126	Myelin	0.85	5.5e-09	1.92e-07
DDR1_cg24727290	MAG_cg17096126	Myelin	0.8	1.41e-07	3.54e-06
DDR1_cg25655106	MAG_cg17096126	Myelin	0.86	2.05e-09	7.94e-08
DDR1_cg27237814	MAG_cg17096126	Myelin	0.79	2.65e-07	6.28e-06
DDR1_cg27593250	MAG_cg17096126	Myelin	0.78	7.23e-07	1.55e-05
DDR1_cg05703744	MAG_cg17461485	Myelin	0.83	2.14e-08	6.46e-07
DDR1_cg07979747	MAG_cg17461485	Myelin	0.77	9.4e-07	1.96e-05
DDR1_cg09810078	MAG_cg17461485	Myelin	0.82	4.06e-08	1.15e-06
DDR1_cg12669395	MAG_cg17461485	Myelin	0.78	6.32e-07	1.37e-05
DDR1_cg13329862	MAG_cg17461485	Myelin	0.82	4.66e-08	1.31e-06
DDR1_cg13351860	MAG_cg17461485	Myelin	0.75	2.3e-06	4.33e-05
DDR1_cg15656686	MAG_cg17461485	Myelin	0.75	3.05e-06	5.55e-05
DDR1_cg16111190	MAG_cg17461485	Myelin	0.77	1.04e-06	2.15e-05
DDR1_cg17604312	MAG_cg17461485	Myelin	0.78	7.04e-07	1.51e-05
DDR1_cg19215110	MAG_cg17461485	Myelin	0.89	1.81e-10	9.5e-09
DDR1_cg20955507	MAG_cg17461485	Myelin	0.75	2.36e-06	4.42e-05
DDR1_cg27237814	MAG_cg17461485	Myelin	0.78	6.67e-07	1.44e-05
DDR1_cg00466425	MAG_cg17469069	Myelin	0.87	9.77e-10	4.12e-08
DDR1_cg00934322	MAG_cg17469069	Myelin	0.75	2.98e-06	5.43e-05
DDR1_cg01598675	MAG_cg17469069	Myelin	0.76	2.14e-06	4.06e-05
DDR1_cg01936707	MAG_cg17469069	Myelin	0.92	3.09e-12	2.96e-10
DDR1_cg05703744	MAG_cg17469069	Myelin	0.9	1.83e-11	1.33e-09
DDR1_cg06200824	MAG_cg17469069	Myelin	0.79	3.24e-07	7.55e-06
DDR1_cg06501109	MAG_cg17469069	Myelin	0.84	1.27e-08	4.04e-07
DDR1_cg07912416	MAG_cg17469069	Myelin	0.86	2.67e-09	1e-07
DDR1_cg07979747	MAG_cg17469069	Myelin	0.85	4.66e-09	1.65e-07
DDR1_cg08673763	MAG_cg17469069	Myelin	0.88	3.43e-10	1.66e-08
DDR1_cg08684361	MAG_cg17469069	Myelin	0.75	3.2e-06	5.78e-05
DDR1_cg08951271	MAG_cg17469069	Myelin	0.92	2.86e-12	2.79e-10
DDR1_cg09965419	MAG_cg17469069	Myelin	0.78	4.94e-07	1.1e-05
DDR1_cg11530564	MAG_cg17469069	Myelin	0.91	4.85e-12	4.35e-10
DDR1_cg11676038	MAG_cg17469069	Myelin	0.91	6.98e-12	5.91e-10
DDR1_cg12669395	MAG_cg17469069	Myelin	0.91	4.51e-12	4.08e-10
DDR1_cg12847793	MAG_cg17469069	Myelin	0.75	2.59e-06	4.8e-05
DDR1_cg13329862	MAG_cg17469069	Myelin	0.91	5.62e-12	4.93e-10
DDR1_cg13351860	MAG_cg17469069	Myelin	0.91	3.88e-12	3.59e-10
DDR1_cg13695585	MAG_cg17469069	Myelin	0.75	3.35e-06	6.02e-05
DDR1_cg14790552	MAG_cg17469069	Myelin	0.86	2.45e-09	9.27e-08
DDR1_cg15656686	MAG_cg17469069	Myelin	0.89	1.29e-10	7.09e-09
DDR1_cg16111190	MAG_cg17469069	Myelin	0.85	3.94e-09	1.42e-07
DDR1_cg16797094	MAG_cg17469069	Myelin	0.92	2.65e-12	2.64e-10
DDR1_cg17176005	MAG_cg17469069	Myelin	0.81	1.32e-07	3.34e-06
DDR1_cg17604312	MAG_cg17469069	Myelin	0.83	2.39e-08	7.13e-07
DDR1_cg19215110	MAG_cg17469069	Myelin	0.81	1.17e-07	2.99e-06
DDR1_cg19591099	MAG_cg17469069	Myelin	0.79	3.34e-07	7.75e-06
DDR1_cg21677258	MAG_cg17469069	Myelin	0.9	1.6e-11	1.19e-09
DDR1_cg24636809	MAG_cg17469069	Myelin	0.88	4.01e-10	1.9e-08
DDR1_cg24727290	MAG_cg17469069	Myelin	0.86	2.34e-09	8.92e-08
DDR1_cg25613385	MAG_cg17469069	Myelin	0.79	3.06e-07	7.17e-06
DDR1_cg25655106	MAG_cg17469069	Myelin	0.93	6.61e-13	8.36e-11
DDR1_cg27237814	MAG_cg17469069	Myelin	0.88	2.5e-10	1.26e-08
DDR1_cg27593250	MAG_cg17469069	Myelin	0.76	1.81e-06	3.5e-05
DDR1_cg05703744	MAG_cg18155720	Myelin	0.79	4.07e-07	9.25e-06
DDR1_cg08673763	MAG_cg18155720	Myelin	0.75	3.51e-06	6.27e-05
DDR1_cg08951271	MAG_cg18155720	Myelin	0.76	1.41e-06	2.82e-05
DDR1_cg11530564	MAG_cg18155720	Myelin	0.83	2.3e-08	6.9e-07
DDR1_cg12669395	MAG_cg18155720	Myelin	0.76	1.85e-06	3.58e-05
DDR1_cg13329862	MAG_cg18155720	Myelin	0.78	7.62e-07	1.62e-05
DDR1_cg13351860	MAG_cg18155720	Myelin	0.83	3.53e-08	1.02e-06
DDR1_cg13695585	MAG_cg18155720	Myelin	0.82	4.82e-08	1.35e-06
DDR1_cg15656686	MAG_cg18155720	Myelin	0.76	1.72e-06	3.35e-05
DDR1_cg16111190	MAG_cg18155720	Myelin	0.76	2.09e-06	3.98e-05
DDR1_cg16797094	MAG_cg18155720	Myelin	0.8	1.54e-07	3.86e-06
DDR1_cg17176005	MAG_cg18155720	Myelin	0.79	3.74e-07	8.58e-06
DDR1_cg19215110	MAG_cg18155720	Myelin	0.75	2.65e-06	4.91e-05
DDR1_cg21677258	MAG_cg18155720	Myelin	0.79	4.19e-07	9.49e-06
DDR1_cg27237814	MAG_cg18155720	Myelin	0.75	2.72e-06	5.01e-05
DDR1_cg00466425	MAG_cg19694850	Myelin	0.83	2.57e-08	7.6e-07
DDR1_cg01598675	MAG_cg19694850	Myelin	0.8	2.22e-07	5.35e-06
DDR1_cg01936707	MAG_cg19694850	Myelin	0.86	3.18e-09	1.17e-07
DDR1_cg05703744	MAG_cg19694850	Myelin	0.89	9.17e-11	5.29e-09
DDR1_cg06200824	MAG_cg19694850	Myelin	0.76	1.95e-06	3.73e-05
DDR1_cg07908039	MAG_cg19694850	Myelin	0.79	3.96e-07	9.02e-06
DDR1_cg07912416	MAG_cg19694850	Myelin	0.86	2.14e-09	8.25e-08
DDR1_cg07979747	MAG_cg19694850	Myelin	0.91	1.5e-11	1.13e-09
DDR1_cg08673763	MAG_cg19694850	Myelin	0.88	4.67e-10	2.17e-08
DDR1_cg08684361	MAG_cg19694850	Myelin	0.75	2.91e-06	5.32e-05
DDR1_cg08951271	MAG_cg19694850	Myelin	0.9	3.28e-11	2.19e-09
DDR1_cg09965419	MAG_cg19694850	Myelin	0.76	1.68e-06	3.28e-05
DDR1_cg11530564	MAG_cg19694850	Myelin	0.89	1.53e-10	8.23e-09
DDR1_cg11676038	MAG_cg19694850	Myelin	0.87	1.3e-09	5.3e-08
DDR1_cg12669395	MAG_cg19694850	Myelin	0.88	4.91e-10	2.26e-08
DDR1_cg13329862	MAG_cg19694850	Myelin	0.89	8.16e-11	4.81e-09
DDR1_cg13351860	MAG_cg19694850	Myelin	0.86	2.05e-09	7.94e-08
DDR1_cg13695585	MAG_cg19694850	Myelin	0.75	2.25e-06	4.24e-05
DDR1_cg14058861	MAG_cg19694850	Myelin	0.76	1.56e-06	3.07e-05
DDR1_cg14790552	MAG_cg19694850	Myelin	0.86	2.34e-09	8.92e-08
DDR1_cg15656686	MAG_cg19694850	Myelin	0.85	5.06e-09	1.78e-07
DDR1_cg16111190	MAG_cg19694850	Myelin	0.87	1.18e-09	4.87e-08
DDR1_cg16797094	MAG_cg19694850	Myelin	0.86	1.63e-09	6.49e-08
DDR1_cg17176005	MAG_cg19694850	Myelin	0.88	2.64e-10	1.32e-08
DDR1_cg17604312	MAG_cg19694850	Myelin	0.82	6.52e-08	1.77e-06
DDR1_cg19215110	MAG_cg19694850	Myelin	0.83	1.92e-08	5.86e-07
DDR1_cg21677258	MAG_cg19694850	Myelin	0.92	1.1e-12	1.27e-10
DDR1_cg24636809	MAG_cg19694850	Myelin	0.82	5.16e-08	1.43e-06
DDR1_cg24727290	MAG_cg19694850	Myelin	0.8	1.5e-07	3.75e-06
DDR1_cg25655106	MAG_cg19694850	Myelin	0.9	5.37e-11	3.35e-09
DDR1_cg27237814	MAG_cg19694850	Myelin	0.88	2.78e-10	1.39e-08
DDR1_cg00466425	MAG_cg21305926	Myelin	0.87	7.31e-10	3.2e-08
DDR1_cg01598675	MAG_cg21305926	Myelin	0.77	1.15e-06	2.36e-05
DDR1_cg01936707	MAG_cg21305926	Myelin	0.89	8.65e-11	5.05e-09
DDR1_cg05703744	MAG_cg21305926	Myelin	0.91	1.06e-11	8.47e-10
DDR1_cg06200824	MAG_cg21305926	Myelin	0.81	7.95e-08	2.11e-06
DDR1_cg06501109	MAG_cg21305926	Myelin	0.81	9.96e-08	2.59e-06
DDR1_cg07908039	MAG_cg21305926	Myelin	0.75	3.51e-06	6.27e-05
DDR1_cg07912416	MAG_cg21305926	Myelin	0.86	2.45e-09	9.27e-08
DDR1_cg07979747	MAG_cg21305926	Myelin	0.87	6.31e-10	2.82e-08
DDR1_cg08673763	MAG_cg21305926	Myelin	0.9	4.21e-11	2.72e-09
DDR1_cg08951271	MAG_cg21305926	Myelin	0.88	2.64e-10	1.32e-08
DDR1_cg11530564	MAG_cg21305926	Myelin	0.89	1.71e-10	9.06e-09
DDR1_cg11676038	MAG_cg21305926	Myelin	0.92	1.41e-12	1.55e-10
DDR1_cg12669395	MAG_cg21305926	Myelin	0.92	1.41e-12	1.55e-10
DDR1_cg13329862	MAG_cg21305926	Myelin	0.86	2.67e-09	1e-07
DDR1_cg13351860	MAG_cg21305926	Myelin	0.86	1.56e-09	6.24e-08
DDR1_cg14058861	MAG_cg21305926	Myelin	0.76	1.95e-06	3.73e-05
DDR1_cg14790552	MAG_cg21305926	Myelin	0.89	1.29e-10	7.09e-09
DDR1_cg15656686	MAG_cg21305926	Myelin	0.83	3.07e-08	8.93e-07
DDR1_cg15720085	MAG_cg21305926	Myelin	0.76	1.38e-06	2.76e-05
DDR1_cg16111190	MAG_cg21305926	Myelin	0.85	6.48e-09	2.22e-07
DDR1_cg16797094	MAG_cg21305926	Myelin	0.84	1.53e-08	4.79e-07
DDR1_cg17176005	MAG_cg21305926	Myelin	0.8	2.03e-07	4.93e-06
DDR1_cg17604312	MAG_cg21305926	Myelin	0.82	3.92e-08	1.12e-06
DDR1_cg18577693	MAG_cg21305926	Myelin	0.75	2.3e-06	4.33e-05
DDR1_cg19215110	MAG_cg21305926	Myelin	0.75	2.78e-06	5.11e-05
DDR1_cg19591099	MAG_cg21305926	Myelin	0.79	4.43e-07	9.98e-06
DDR1_cg21677258	MAG_cg21305926	Myelin	0.9	1.83e-11	1.33e-09
DDR1_cg24636809	MAG_cg21305926	Myelin	0.9	2.23e-11	1.58e-09
DDR1_cg24727290	MAG_cg21305926	Myelin	0.81	1.24e-07	3.16e-06
DDR1_cg25613385	MAG_cg21305926	Myelin	0.75	3.27e-06	5.9e-05
DDR1_cg25655106	MAG_cg21305926	Myelin	0.94	8.42e-14	1.6e-11
DDR1_cg27237814	MAG_cg21305926	Myelin	0.86	2.05e-09	7.94e-08
DDR1_cg27593250	MAG_cg21305926	Myelin	0.83	2.39e-08	7.13e-07
DDR1_cg00466425	MAG_cg22266001	Myelin	0.84	1.37e-08	4.33e-07
DDR1_cg01936707	MAG_cg22266001	Myelin	0.83	2.76e-08	8.11e-07
DDR1_cg05703744	MAG_cg22266001	Myelin	0.83	3.66e-08	1.05e-06
DDR1_cg06501109	MAG_cg22266001	Myelin	0.76	1.52e-06	3.01e-05
DDR1_cg07908039	MAG_cg22266001	Myelin	0.76	2.04e-06	3.9e-05
DDR1_cg07912416	MAG_cg22266001	Myelin	0.76	1.41e-06	2.82e-05
DDR1_cg07979747	MAG_cg22266001	Myelin	0.76	1.77e-06	3.43e-05
DDR1_cg08673763	MAG_cg22266001	Myelin	0.81	9.96e-08	2.59e-06
DDR1_cg08684361	MAG_cg22266001	Myelin	0.76	1.81e-06	3.5e-05
DDR1_cg08951271	MAG_cg22266001	Myelin	0.9	1.83e-11	1.33e-09
DDR1_cg11530564	MAG_cg22266001	Myelin	0.92	1.65e-12	1.78e-10
DDR1_cg11676038	MAG_cg22266001	Myelin	0.83	3.18e-08	9.22e-07
DDR1_cg12669395	MAG_cg22266001	Myelin	0.85	5.06e-09	1.78e-07
DDR1_cg12847793	MAG_cg22266001	Myelin	0.79	3.06e-07	7.17e-06
DDR1_cg13329862	MAG_cg22266001	Myelin	0.9	2.54e-11	1.76e-09
DDR1_cg13351860	MAG_cg22266001	Myelin	0.9	1.83e-11	1.33e-09
DDR1_cg13695585	MAG_cg22266001	Myelin	0.79	3.24e-07	7.55e-06
DDR1_cg14790552	MAG_cg22266001	Myelin	0.83	2.86e-08	8.38e-07
DDR1_cg15656686	MAG_cg22266001	Myelin	0.84	1.13e-08	3.65e-07
DDR1_cg16111190	MAG_cg22266001	Myelin	0.84	1.04e-08	3.4e-07
DDR1_cg16797094	MAG_cg22266001	Myelin	0.86	1.56e-09	6.24e-08
DDR1_cg17176005	MAG_cg22266001	Myelin	0.77	1.22e-06	2.47e-05
DDR1_cg19215110	MAG_cg22266001	Myelin	0.77	1.04e-06	2.15e-05
DDR1_cg21677258	MAG_cg22266001	Myelin	0.86	1.56e-09	6.24e-08
DDR1_cg24636809	MAG_cg22266001	Myelin	0.8	1.64e-07	4.08e-06
DDR1_cg24727290	MAG_cg22266001	Myelin	0.8	2.57e-07	6.12e-06
DDR1_cg25655106	MAG_cg22266001	Myelin	0.84	1.09e-08	3.52e-07
DDR1_cg27237814	MAG_cg22266001	Myelin	0.87	8.06e-10	3.49e-08
DDR1_cg00466425	MAG_cg27017562	Myelin	0.92	1.19e-12	1.36e-10
DDR1_cg01598675	MAG_cg27017562	Myelin	0.77	1.28e-06	2.58e-05
DDR1_cg01936707	MAG_cg27017562	Myelin	0.92	1.1e-12	1.27e-10
DDR1_cg05703744	MAG_cg27017562	Myelin	0.93	4.26e-13	5.84e-11
DDR1_cg06200824	MAG_cg27017562	Myelin	0.83	2.86e-08	8.38e-07
DDR1_cg06501109	MAG_cg27017562	Myelin	0.85	7.61e-09	2.56e-07
DDR1_cg07908039	MAG_cg27017562	Myelin	0.76	1.72e-06	3.35e-05
DDR1_cg07912416	MAG_cg27017562	Myelin	0.88	2.01e-10	1.05e-08
DDR1_cg07979747	MAG_cg27017562	Myelin	0.89	1.15e-10	6.43e-09
DDR1_cg08673763	MAG_cg27017562	Myelin	0.91	6.98e-12	5.91e-10
DDR1_cg08684361	MAG_cg27017562	Myelin	0.75	3.13e-06	5.67e-05
DDR1_cg08951271	MAG_cg27017562	Myelin	0.93	3.24e-13	4.65e-11
DDR1_cg09965419	MAG_cg27017562	Myelin	0.8	1.74e-07	4.31e-06
DDR1_cg11530564	MAG_cg27017562	Myelin	0.91	1.4e-11	1.06e-09
DDR1_cg11676038	MAG_cg27017562	Myelin	0.93	6.61e-13	8.36e-11
DDR1_cg12669395	MAG_cg27017562	Myelin	0.92	1.52e-12	1.66e-10
DDR1_cg13329862	MAG_cg27017562	Myelin	0.91	1.06e-11	8.47e-10
DDR1_cg13351860	MAG_cg27017562	Myelin	0.92	3.34e-12	3.17e-10
DDR1_cg14058861	MAG_cg27017562	Myelin	0.78	5.99e-07	1.31e-05
DDR1_cg14790552	MAG_cg27017562	Myelin	0.87	9.77e-10	4.12e-08
DDR1_cg15656686	MAG_cg27017562	Myelin	0.86	1.71e-09	6.76e-08
DDR1_cg15720085	MAG_cg27017562	Myelin	0.76	1.85e-06	3.58e-05
DDR1_cg16111190	MAG_cg27017562	Myelin	0.86	2.56e-09	9.63e-08
DDR1_cg16797094	MAG_cg27017562	Myelin	0.88	3.43e-10	1.66e-08
DDR1_cg17176005	MAG_cg27017562	Myelin	0.83	3.53e-08	1.02e-06
DDR1_cg17604312	MAG_cg27017562	Myelin	0.86	2.79e-09	1.04e-07
DDR1_cg18577693	MAG_cg27017562	Myelin	0.76	1.6e-06	3.14e-05
DDR1_cg19215110	MAG_cg27017562	Myelin	0.79	4.07e-07	9.25e-06
DDR1_cg19591099	MAG_cg27017562	Myelin	0.82	5.71e-08	1.57e-06
DDR1_cg21677258	MAG_cg27017562	Myelin	0.92	1.1e-12	1.27e-10
DDR1_cg24636809	MAG_cg27017562	Myelin	0.92	2.1e-12	2.17e-10
DDR1_cg24727290	MAG_cg27017562	Myelin	0.88	3.61e-10	1.73e-08
DDR1_cg25613385	MAG_cg27017562	Myelin	0.75	2.65e-06	4.91e-05
DDR1_cg25655106	MAG_cg27017562	Myelin	0.96	4.44e-16	3.14e-13
DDR1_cg27237814	MAG_cg27017562	Myelin	0.89	1.37e-10	7.45e-09
DDR1_cg27593250	MAG_cg27017562	Myelin	0.84	1.65e-08	5.13e-07
DDR1_cg00466425	MBP_cg00187503	Myelin	0.81	8.76e-08	2.31e-06
DDR1_cg00934322	MBP_cg00187503	Myelin	0.76	1.85e-06	3.58e-05
DDR1_cg01936707	MBP_cg00187503	Myelin	0.91	1.14e-11	8.99e-10
DDR1_cg05703744	MBP_cg00187503	Myelin	0.89	9.17e-11	5.29e-09
DDR1_cg06200824	MBP_cg00187503	Myelin	0.75	2.85e-06	5.22e-05
DDR1_cg06501109	MBP_cg00187503	Myelin	0.79	2.81e-07	6.62e-06
DDR1_cg07908039	MBP_cg00187503	Myelin	0.76	1.56e-06	3.07e-05
DDR1_cg07912416	MBP_cg00187503	Myelin	0.83	1.78e-08	5.48e-07
DDR1_cg07979747	MBP_cg00187503	Myelin	0.82	4.2e-08	1.19e-06
DDR1_cg08673763	MBP_cg00187503	Myelin	0.87	6e-10	2.7e-08
DDR1_cg08951271	MBP_cg00187503	Myelin	0.88	5.17e-10	2.36e-08
DDR1_cg11530564	MBP_cg00187503	Myelin	0.93	6.61e-13	8.36e-11
DDR1_cg11676038	MBP_cg00187503	Myelin	0.93	7.2e-13	8.96e-11
DDR1_cg12669395	MBP_cg00187503	Myelin	0.93	5.08e-13	6.78e-11
DDR1_cg13329862	MBP_cg00187503	Myelin	0.88	2.78e-10	1.39e-08
DDR1_cg13351860	MBP_cg00187503	Myelin	0.86	1.96e-09	7.64e-08
DDR1_cg14790552	MBP_cg00187503	Myelin	0.86	1.87e-09	7.34e-08
DDR1_cg15656686	MBP_cg00187503	Myelin	0.87	1.36e-09	5.52e-08
DDR1_cg16111190	MBP_cg00187503	Myelin	0.86	2.45e-09	9.27e-08
DDR1_cg16797094	MBP_cg00187503	Myelin	0.89	7.25e-11	4.36e-09
DDR1_cg17176005	MBP_cg00187503	Myelin	0.76	1.38e-06	2.76e-05
DDR1_cg17604312	MBP_cg00187503	Myelin	0.83	2.3e-08	6.9e-07
DDR1_cg19215110	MBP_cg00187503	Myelin	0.8	1.59e-07	3.97e-06
DDR1_cg19591099	MBP_cg00187503	Myelin	0.79	4.19e-07	9.49e-06
DDR1_cg21677258	MBP_cg00187503	Myelin	0.89	6.44e-11	3.93e-09
DDR1_cg24636809	MBP_cg00187503	Myelin	0.87	1.18e-09	4.87e-08
DDR1_cg24727290	MBP_cg00187503	Myelin	0.82	6.97e-08	1.88e-06
DDR1_cg25613385	MBP_cg00187503	Myelin	0.78	5.83e-07	1.28e-05
DDR1_cg25655106	MBP_cg00187503	Myelin	0.9	1.95e-11	1.41e-09
DDR1_cg27237814	MBP_cg00187503	Myelin	0.83	3.18e-08	9.22e-07
DDR1_cg00466425	MBP_cg00706570	Myelin	0.81	1.06e-07	2.74e-06
DDR1_cg01936707	MBP_cg00706570	Myelin	0.85	5.73e-09	1.99e-07
DDR1_cg05703744	MBP_cg00706570	Myelin	0.92	3.6e-12	3.37e-10
DDR1_cg06501109	MBP_cg00706570	Myelin	0.79	4.07e-07	9.25e-06
DDR1_cg07908039	MBP_cg00706570	Myelin	0.77	1.07e-06	2.2e-05
DDR1_cg07912416	MBP_cg00706570	Myelin	0.81	1.06e-07	2.74e-06
DDR1_cg07979747	MBP_cg00706570	Myelin	0.84	1.59e-08	4.96e-07
DDR1_cg08673763	MBP_cg00706570	Myelin	0.8	1.91e-07	4.67e-06
DDR1_cg08684361	MBP_cg00706570	Myelin	0.77	1.04e-06	2.15e-05
DDR1_cg08951271	MBP_cg00706570	Myelin	0.89	1.37e-10	7.45e-09
DDR1_cg11530564	MBP_cg00706570	Myelin	0.94	6.17e-14	1.26e-11
DDR1_cg11676038	MBP_cg00706570	Myelin	0.89	9.17e-11	5.29e-09
DDR1_cg12669395	MBP_cg00706570	Myelin	0.89	1.53e-10	8.23e-09
DDR1_cg13329862	MBP_cg00706570	Myelin	0.84	1e-08	3.29e-07
DDR1_cg13351860	MBP_cg00706570	Myelin	0.92	3.6e-12	3.37e-10
DDR1_cg13695585	MBP_cg00706570	Myelin	0.78	7.83e-07	1.66e-05
DDR1_cg14790552	MBP_cg00706570	Myelin	0.87	1.02e-09	4.31e-08
DDR1_cg15656686	MBP_cg00706570	Myelin	0.85	5.97e-09	2.06e-07
DDR1_cg16111190	MBP_cg00706570	Myelin	0.84	1.13e-08	3.65e-07
DDR1_cg16797094	MBP_cg00706570	Myelin	0.9	2.71e-11	1.85e-09
DDR1_cg17176005	MBP_cg00706570	Myelin	0.83	2.96e-08	8.66e-07
DDR1_cg17604312	MBP_cg00706570	Myelin	0.81	1.28e-07	3.25e-06
DDR1_cg18577693	MBP_cg00706570	Myelin	0.75	3.51e-06	6.27e-05
DDR1_cg19215110	MBP_cg00706570	Myelin	0.75	2.72e-06	5.01e-05
DDR1_cg21677258	MBP_cg00706570	Myelin	0.9	5.06e-11	3.18e-09
DDR1_cg24636809	MBP_cg00706570	Myelin	0.87	1.24e-09	5.08e-08
DDR1_cg24727290	MBP_cg00706570	Myelin	0.78	5.37e-07	1.19e-05
DDR1_cg25613385	MBP_cg00706570	Myelin	0.79	2.73e-07	6.44e-06
DDR1_cg25655106	MBP_cg00706570	Myelin	0.85	5.28e-09	1.85e-07
DDR1_cg27237814	MBP_cg00706570	Myelin	0.85	5.28e-09	1.85e-07
DDR1_cg27593250	MBP_cg00706570	Myelin	0.82	6.97e-08	1.88e-06
DDR1_cg00466425	MBP_cg00735329	Myelin	0.89	8.16e-11	4.81e-09
DDR1_cg01598675	MBP_cg00735329	Myelin	0.81	1.17e-07	2.99e-06
DDR1_cg01936707	MBP_cg00735329	Myelin	0.87	1.3e-09	5.3e-08
DDR1_cg05703744	MBP_cg00735329	Myelin	0.92	1.65e-12	1.78e-10
DDR1_cg06200824	MBP_cg00735329	Myelin	0.79	4.07e-07	9.25e-06
DDR1_cg06501109	MBP_cg00735329	Myelin	0.76	1.85e-06	3.58e-05
DDR1_cg07912416	MBP_cg00735329	Myelin	0.83	2.57e-08	7.6e-07
DDR1_cg07979747	MBP_cg00735329	Myelin	0.88	2.78e-10	1.39e-08
DDR1_cg08673763	MBP_cg00735329	Myelin	0.85	4.28e-09	1.53e-07
DDR1_cg08684361	MBP_cg00735329	Myelin	0.76	2.04e-06	3.9e-05
DDR1_cg08951271	MBP_cg00735329	Myelin	0.93	5.55e-13	7.29e-11
DDR1_cg11530564	MBP_cg00735329	Myelin	0.92	1.3e-12	1.46e-10
DDR1_cg11676038	MBP_cg00735329	Myelin	0.92	9.29e-13	1.11e-10
DDR1_cg12669395	MBP_cg00735329	Myelin	0.9	3.49e-11	2.31e-09
DDR1_cg13329862	MBP_cg00735329	Myelin	0.91	6.98e-12	5.91e-10
DDR1_cg13351860	MBP_cg00735329	Myelin	0.91	7.49e-12	6.29e-10
DDR1_cg14790552	MBP_cg00735329	Myelin	0.92	2.86e-12	2.79e-10
DDR1_cg15656686	MBP_cg00735329	Myelin	0.86	2.79e-09	1.04e-07
DDR1_cg16111190	MBP_cg00735329	Myelin	0.86	2.79e-09	1.04e-07
DDR1_cg16797094	MBP_cg00735329	Myelin	0.88	3.09e-10	1.52e-08
DDR1_cg17176005	MBP_cg00735329	Myelin	0.81	1.2e-07	3.07e-06
DDR1_cg17604312	MBP_cg00735329	Myelin	0.78	5.83e-07	1.28e-05
DDR1_cg19215110	MBP_cg00735329	Myelin	0.8	1.91e-07	4.67e-06
DDR1_cg19591099	MBP_cg00735329	Myelin	0.82	6.31e-08	1.72e-06
DDR1_cg20335906	MBP_cg00735329	Myelin	0.76	1.45e-06	2.88e-05
DDR1_cg21677258	MBP_cg00735329	Myelin	0.9	1.71e-11	1.26e-09
DDR1_cg24636809	MBP_cg00735329	Myelin	0.89	1.45e-10	7.83e-09
DDR1_cg24727290	MBP_cg00735329	Myelin	0.82	5.34e-08	1.47e-06
DDR1_cg25655106	MBP_cg00735329	Myelin	0.88	3.43e-10	1.66e-08
DDR1_cg27237814	MBP_cg00735329	Myelin	0.92	1.65e-12	1.78e-10
DDR1_cg27593250	MBP_cg00735329	Myelin	0.84	1.13e-08	3.65e-07
DDR1_cg00466425	MBP_cg00839132	Myelin	0.91	4.51e-12	4.08e-10
DDR1_cg01598675	MBP_cg00839132	Myelin	0.79	2.73e-07	6.44e-06
DDR1_cg01936707	MBP_cg00839132	Myelin	0.88	4.01e-10	1.9e-08
DDR1_cg05703744	MBP_cg00839132	Myelin	0.91	1.06e-11	8.47e-10
DDR1_cg06200824	MBP_cg00839132	Myelin	0.78	6.67e-07	1.44e-05
DDR1_cg06501109	MBP_cg00839132	Myelin	0.81	7.44e-08	1.99e-06
DDR1_cg07908039	MBP_cg00839132	Myelin	0.78	5.37e-07	1.19e-05
DDR1_cg07912416	MBP_cg00839132	Myelin	0.83	2.96e-08	8.66e-07
DDR1_cg07979747	MBP_cg00839132	Myelin	0.85	3.77e-09	1.37e-07
DDR1_cg08673763	MBP_cg00839132	Myelin	0.86	1.96e-09	7.64e-08
DDR1_cg08951271	MBP_cg00839132	Myelin	0.93	2.04e-13	3.19e-11
DDR1_cg11530564	MBP_cg00839132	Myelin	0.93	6.61e-13	8.36e-11
DDR1_cg11676038	MBP_cg00839132	Myelin	0.93	1.68e-13	2.75e-11
DDR1_cg12669395	MBP_cg00839132	Myelin	0.93	5.55e-13	7.29e-11
DDR1_cg12847793	MBP_cg00839132	Myelin	0.76	1.85e-06	3.58e-05
DDR1_cg13329862	MBP_cg00839132	Myelin	0.92	1.79e-12	1.9e-10
DDR1_cg13351860	MBP_cg00839132	Myelin	0.92	1.94e-12	2.03e-10
DDR1_cg14790552	MBP_cg00839132	Myelin	0.89	6.06e-11	3.72e-09
DDR1_cg15656686	MBP_cg00839132	Myelin	0.87	5.43e-10	2.47e-08
DDR1_cg15720085	MBP_cg00839132	Myelin	0.75	2.36e-06	4.42e-05
DDR1_cg16111190	MBP_cg00839132	Myelin	0.86	3.18e-09	1.17e-07
DDR1_cg16797094	MBP_cg00839132	Myelin	0.89	1.62e-10	8.64e-09
DDR1_cg17176005	MBP_cg00839132	Myelin	0.78	4.68e-07	1.05e-05
DDR1_cg17604312	MBP_cg00839132	Myelin	0.84	1.37e-08	4.33e-07
DDR1_cg18577693	MBP_cg00839132	Myelin	0.76	1.38e-06	2.76e-05
DDR1_cg19215110	MBP_cg00839132	Myelin	0.78	4.94e-07	1.1e-05
DDR1_cg19591099	MBP_cg00839132	Myelin	0.84	1.17e-08	3.77e-07
DDR1_cg20335906	MBP_cg00839132	Myelin	0.79	4.19e-07	9.49e-06
DDR1_cg21677258	MBP_cg00839132	Myelin	0.91	1.31e-11	1.01e-09
DDR1_cg24636809	MBP_cg00839132	Myelin	0.9	2.09e-11	1.49e-09
DDR1_cg24727290	MBP_cg00839132	Myelin	0.83	2.3e-08	6.9e-07
DDR1_cg25613385	MBP_cg00839132	Myelin	0.76	2.14e-06	4.06e-05
DDR1_cg25655106	MBP_cg00839132	Myelin	0.91	5.22e-12	4.64e-10
DDR1_cg25943433	MBP_cg00839132	Myelin	0.77	1.07e-06	2.2e-05
DDR1_cg27237814	MBP_cg00839132	Myelin	0.93	6.06e-13	7.8e-11
DDR1_cg27593250	MBP_cg00839132	Myelin	0.85	7.02e-09	2.39e-07
DDR1_cg01598675	MBP_cg00912518	Myelin	0.78	5.99e-07	1.31e-05
DDR1_cg14790552	MBP_cg00912518	Myelin	0.75	2.53e-06	4.71e-05
DDR1_cg00466425	MBP_cg01475204	Myelin	0.87	7.31e-10	3.2e-08
DDR1_cg01598675	MBP_cg01475204	Myelin	0.79	3.06e-07	7.17e-06
DDR1_cg01936707	MBP_cg01475204	Myelin	0.9	5.37e-11	3.35e-09
DDR1_cg05703744	MBP_cg01475204	Myelin	0.93	2.24e-13	3.46e-11
DDR1_cg06200824	MBP_cg01475204	Myelin	0.8	1.74e-07	4.31e-06
DDR1_cg06501109	MBP_cg01475204	Myelin	0.76	1.68e-06	3.28e-05
DDR1_cg07908039	MBP_cg01475204	Myelin	0.81	1.17e-07	2.99e-06
DDR1_cg07912416	MBP_cg01475204	Myelin	0.86	2.14e-09	8.25e-08
DDR1_cg07979747	MBP_cg01475204	Myelin	0.88	2.37e-10	1.2e-08
DDR1_cg08673763	MBP_cg01475204	Myelin	0.89	1.15e-10	6.43e-09
DDR1_cg08684361	MBP_cg01475204	Myelin	0.75	2.36e-06	4.42e-05
DDR1_cg08951271	MBP_cg01475204	Myelin	0.93	4.65e-13	6.26e-11
DDR1_cg09822812	MBP_cg01475204	Myelin	0.76	1.45e-06	2.88e-05
DDR1_cg09965419	MBP_cg01475204	Myelin	0.76	1.85e-06	3.58e-05
DDR1_cg11530564	MBP_cg01475204	Myelin	0.92	8.54e-13	1.03e-10
DDR1_cg11676038	MBP_cg01475204	Myelin	0.92	3.6e-12	3.37e-10
DDR1_cg12669395	MBP_cg01475204	Myelin	0.91	1.14e-11	8.99e-10
DDR1_cg13329862	MBP_cg01475204	Myelin	0.91	5.62e-12	4.93e-10
DDR1_cg13351860	MBP_cg01475204	Myelin	0.92	9.29e-13	1.11e-10
DDR1_cg13695585	MBP_cg01475204	Myelin	0.79	4.55e-07	1.02e-05
DDR1_cg14790552	MBP_cg01475204	Myelin	0.9	3.71e-11	2.44e-09
DDR1_cg15656686	MBP_cg01475204	Myelin	0.89	7.25e-11	4.36e-09
DDR1_cg16111190	MBP_cg01475204	Myelin	0.87	7.68e-10	3.34e-08
DDR1_cg16797094	MBP_cg01475204	Myelin	0.91	1.4e-11	1.06e-09
DDR1_cg17176005	MBP_cg01475204	Myelin	0.83	3.07e-08	8.93e-07
DDR1_cg17604312	MBP_cg01475204	Myelin	0.85	5.73e-09	1.99e-07
DDR1_cg18577693	MBP_cg01475204	Myelin	0.76	2.2e-06	4.15e-05
DDR1_cg19215110	MBP_cg01475204	Myelin	0.82	4.06e-08	1.15e-06
DDR1_cg19591099	MBP_cg01475204	Myelin	0.79	2.97e-07	6.98e-06
DDR1_cg20335906	MBP_cg01475204	Myelin	0.75	3.51e-06	6.27e-05
DDR1_cg20955507	MBP_cg01475204	Myelin	0.75	2.98e-06	5.43e-05
DDR1_cg21677258	MBP_cg01475204	Myelin	0.93	2.04e-13	3.19e-11
DDR1_cg24636809	MBP_cg01475204	Myelin	0.88	2.78e-10	1.39e-08
DDR1_cg24727290	MBP_cg01475204	Myelin	0.84	9.65e-09	3.17e-07
DDR1_cg25613385	MBP_cg01475204	Myelin	0.78	5.52e-07	1.22e-05
DDR1_cg25655106	MBP_cg01475204	Myelin	0.91	1.06e-11	8.47e-10
DDR1_cg27237814	MBP_cg01475204	Myelin	0.93	6.06e-13	7.8e-11
DDR1_cg27593250	MBP_cg01475204	Myelin	0.82	3.92e-08	1.12e-06
DDR1_cg00466425	MBP_cg02782187	Myelin	0.88	4.67e-10	2.17e-08
DDR1_cg00934322	MBP_cg02782187	Myelin	0.78	6.85e-07	1.48e-05
DDR1_cg01936707	MBP_cg02782187	Myelin	0.9	4.21e-11	2.72e-09
DDR1_cg05703744	MBP_cg02782187	Myelin	0.92	1.3e-12	1.46e-10
DDR1_cg06200824	MBP_cg02782187	Myelin	0.77	8.03e-07	1.7e-05
DDR1_cg06501109	MBP_cg02782187	Myelin	0.79	3.34e-07	7.75e-06
DDR1_cg07908039	MBP_cg02782187	Myelin	0.77	1.07e-06	2.2e-05
DDR1_cg07912416	MBP_cg02782187	Myelin	0.87	8.06e-10	3.49e-08
DDR1_cg07979747	MBP_cg02782187	Myelin	0.84	9.28e-09	3.06e-07
DDR1_cg08673763	MBP_cg02782187	Myelin	0.89	1.45e-10	7.83e-09
DDR1_cg08684361	MBP_cg02782187	Myelin	0.76	2.04e-06	3.9e-05
DDR1_cg08951271	MBP_cg02782187	Myelin	0.92	2.65e-12	2.64e-10
DDR1_cg09822812	MBP_cg02782187	Myelin	0.75	2.25e-06	4.24e-05
DDR1_cg09965419	MBP_cg02782187	Myelin	0.79	4.19e-07	9.49e-06
DDR1_cg11530564	MBP_cg02782187	Myelin	0.96	4.44e-16	3.14e-13
DDR1_cg11676038	MBP_cg02782187	Myelin	0.92	1.3e-12	1.46e-10
DDR1_cg12669395	MBP_cg02782187	Myelin	0.92	2.86e-12	2.79e-10
DDR1_cg12847793	MBP_cg02782187	Myelin	0.76	1.85e-06	3.58e-05
DDR1_cg13329862	MBP_cg02782187	Myelin	0.93	4.65e-13	6.26e-11
DDR1_cg13351860	MBP_cg02782187	Myelin	0.95	4.88e-15	1.86e-12
DDR1_cg13695585	MBP_cg02782187	Myelin	0.78	6.15e-07	1.34e-05
DDR1_cg14058861	MBP_cg02782187	Myelin	0.76	1.77e-06	3.43e-05
DDR1_cg14790552	MBP_cg02782187	Myelin	0.88	4.67e-10	2.17e-08
DDR1_cg15656686	MBP_cg02782187	Myelin	0.88	2.01e-10	1.05e-08
DDR1_cg16111190	MBP_cg02782187	Myelin	0.89	1.81e-10	9.5e-09
DDR1_cg16797094	MBP_cg02782187	Myelin	0.93	5.08e-13	6.78e-11
DDR1_cg17176005	MBP_cg02782187	Myelin	0.8	2.57e-07	6.12e-06
DDR1_cg17604312	MBP_cg02782187	Myelin	0.81	1.2e-07	3.07e-06
DDR1_cg19215110	MBP_cg02782187	Myelin	0.8	2.15e-07	5.2e-06
DDR1_cg19591099	MBP_cg02782187	Myelin	0.8	1.85e-07	4.55e-06
DDR1_cg21677258	MBP_cg02782187	Myelin	0.92	2.86e-12	2.79e-10
DDR1_cg24636809	MBP_cg02782187	Myelin	0.9	3.28e-11	2.19e-09
DDR1_cg24727290	MBP_cg02782187	Myelin	0.87	5.43e-10	2.47e-08
DDR1_cg25613385	MBP_cg02782187	Myelin	0.78	6.15e-07	1.34e-05
DDR1_cg25655106	MBP_cg02782187	Myelin	0.91	4.51e-12	4.08e-10
DDR1_cg27237814	MBP_cg02782187	Myelin	0.88	2.78e-10	1.39e-08
DDR1_cg27593250	MBP_cg02782187	Myelin	0.79	3.74e-07	8.58e-06
DDR1_cg00466425	MBP_cg03560685	Myelin	0.88	4.44e-10	2.07e-08
DDR1_cg00934322	MBP_cg03560685	Myelin	0.75	2.78e-06	5.11e-05
DDR1_cg01936707	MBP_cg03560685	Myelin	0.9	4.47e-11	2.86e-09
DDR1_cg05703744	MBP_cg03560685	Myelin	0.88	2.13e-10	1.1e-08
DDR1_cg06200824	MBP_cg03560685	Myelin	0.77	9.4e-07	1.96e-05
DDR1_cg06501109	MBP_cg03560685	Myelin	0.84	9.28e-09	3.06e-07
DDR1_cg07912416	MBP_cg03560685	Myelin	0.86	2.14e-09	8.25e-08
DDR1_cg07979747	MBP_cg03560685	Myelin	0.85	7.92e-09	2.66e-07
DDR1_cg08673763	MBP_cg03560685	Myelin	0.8	1.54e-07	3.86e-06
DDR1_cg08684361	MBP_cg03560685	Myelin	0.84	8.92e-09	2.96e-07
DDR1_cg08951271	MBP_cg03560685	Myelin	0.93	6.61e-13	8.36e-11
DDR1_cg09965419	MBP_cg03560685	Myelin	0.83	2.14e-08	6.46e-07
DDR1_cg11530564	MBP_cg03560685	Myelin	0.93	5.55e-13	7.29e-11
DDR1_cg11676038	MBP_cg03560685	Myelin	0.88	4.01e-10	1.9e-08
DDR1_cg12669395	MBP_cg03560685	Myelin	0.88	2.37e-10	1.2e-08
DDR1_cg12847793	MBP_cg03560685	Myelin	0.83	2.96e-08	8.66e-07
DDR1_cg13329862	MBP_cg03560685	Myelin	0.92	2.45e-12	2.47e-10
DDR1_cg13351860	MBP_cg03560685	Myelin	0.94	1.87e-14	5e-12
DDR1_cg13695585	MBP_cg03560685	Myelin	0.79	4.07e-07	9.25e-06
DDR1_cg14790552	MBP_cg03560685	Myelin	0.79	3.53e-07	8.16e-06
DDR1_cg15656686	MBP_cg03560685	Myelin	0.92	8.54e-13	1.03e-10
DDR1_cg16111190	MBP_cg03560685	Myelin	0.84	8.58e-09	2.86e-07
DDR1_cg16797094	MBP_cg03560685	Myelin	0.93	4.26e-13	5.84e-11
DDR1_cg17176005	MBP_cg03560685	Myelin	0.81	1.17e-07	2.99e-06
DDR1_cg17604312	MBP_cg03560685	Myelin	0.8	1.64e-07	4.08e-06
DDR1_cg19215110	MBP_cg03560685	Myelin	0.76	1.68e-06	3.28e-05
DDR1_cg19591099	MBP_cg03560685	Myelin	0.77	8.69e-07	1.83e-05
DDR1_cg21677258	MBP_cg03560685	Myelin	0.89	9.17e-11	5.29e-09
DDR1_cg24636809	MBP_cg03560685	Myelin	0.87	6.96e-10	3.06e-08
DDR1_cg24727290	MBP_cg03560685	Myelin	0.87	1.3e-09	5.3e-08
DDR1_cg25613385	MBP_cg03560685	Myelin	0.83	3.53e-08	1.02e-06
DDR1_cg25655106	MBP_cg03560685	Myelin	0.9	4.76e-11	3.02e-09
DDR1_cg27237814	MBP_cg03560685	Myelin	0.86	1.96e-09	7.64e-08
DDR1_cg27593250	MBP_cg03560685	Myelin	0.77	1.28e-06	2.58e-05
DDR1_cg00466425	MBP_cg06410824	Myelin	0.91	8.05e-12	6.68e-10
DDR1_cg01598675	MBP_cg06410824	Myelin	0.77	1.15e-06	2.36e-05
DDR1_cg01936707	MBP_cg06410824	Myelin	0.88	2.01e-10	1.05e-08
DDR1_cg05703744	MBP_cg06410824	Myelin	0.89	6.44e-11	3.93e-09
DDR1_cg06200824	MBP_cg06410824	Myelin	0.82	4.06e-08	1.15e-06
DDR1_cg06501109	MBP_cg06410824	Myelin	0.77	9.4e-07	1.96e-05
DDR1_cg07912416	MBP_cg06410824	Myelin	0.89	1.03e-10	5.83e-09
DDR1_cg07979747	MBP_cg06410824	Myelin	0.88	3.81e-10	1.82e-08
DDR1_cg08673763	MBP_cg06410824	Myelin	0.86	1.87e-09	7.34e-08
DDR1_cg08951271	MBP_cg06410824	Myelin	0.93	2.04e-13	3.19e-11
DDR1_cg11530564	MBP_cg06410824	Myelin	0.9	2.38e-11	1.66e-09
DDR1_cg11676038	MBP_cg06410824	Myelin	0.93	2.24e-13	3.46e-11
DDR1_cg12669395	MBP_cg06410824	Myelin	0.91	6.49e-12	5.56e-10
DDR1_cg13329862	MBP_cg06410824	Myelin	0.94	2.09e-14	5.43e-12
DDR1_cg13351860	MBP_cg06410824	Myelin	0.91	8.05e-12	6.68e-10
DDR1_cg14058861	MBP_cg06410824	Myelin	0.82	6.1e-08	1.67e-06
DDR1_cg14790552	MBP_cg06410824	Myelin	0.88	3.61e-10	1.73e-08
DDR1_cg15656686	MBP_cg06410824	Myelin	0.88	3.81e-10	1.82e-08
DDR1_cg15720085	MBP_cg06410824	Myelin	0.78	5.22e-07	1.16e-05
DDR1_cg16111190	MBP_cg06410824	Myelin	0.9	1.95e-11	1.41e-09
DDR1_cg16797094	MBP_cg06410824	Myelin	0.88	3.26e-10	1.59e-08
DDR1_cg17176005	MBP_cg06410824	Myelin	0.82	5.9e-08	1.62e-06
DDR1_cg18577693	MBP_cg06410824	Myelin	0.78	7.23e-07	1.55e-05
DDR1_cg19215110	MBP_cg06410824	Myelin	0.79	4.43e-07	9.98e-06
DDR1_cg19591099	MBP_cg06410824	Myelin	0.87	6e-10	2.7e-08
DDR1_cg21677258	MBP_cg06410824	Myelin	0.91	9.26e-12	7.51e-10
DDR1_cg24566261	MBP_cg06410824	Myelin	0.75	2.3e-06	4.33e-05
DDR1_cg24636809	MBP_cg06410824	Myelin	0.89	1.09e-10	6.12e-09
DDR1_cg24727290	MBP_cg06410824	Myelin	0.85	7.31e-09	2.47e-07
DDR1_cg25655106	MBP_cg06410824	Myelin	0.88	2.37e-10	1.2e-08
DDR1_cg27237814	MBP_cg06410824	Myelin	0.9	2.71e-11	1.85e-09
DDR1_cg27593250	MBP_cg06410824	Myelin	0.82	6.31e-08	1.72e-06
DDR1_cg00466425	MBP_cg06543730	Myelin	0.79	3.96e-07	9.02e-06
DDR1_cg01936707	MBP_cg06543730	Myelin	0.86	2.45e-09	9.27e-08
DDR1_cg05703744	MBP_cg06543730	Myelin	0.92	1.3e-12	1.46e-10
DDR1_cg06200824	MBP_cg06543730	Myelin	0.77	1.31e-06	2.64e-05
DDR1_cg06501109	MBP_cg06543730	Myelin	0.76	1.68e-06	3.28e-05
DDR1_cg07908039	MBP_cg06543730	Myelin	0.8	1.8e-07	4.43e-06
DDR1_cg07912416	MBP_cg06543730	Myelin	0.84	1.65e-08	5.13e-07
DDR1_cg07979747	MBP_cg06543730	Myelin	0.83	2.06e-08	6.25e-07
DDR1_cg08673763	MBP_cg06543730	Myelin	0.88	5.17e-10	2.36e-08
DDR1_cg08684361	MBP_cg06543730	Myelin	0.75	3.13e-06	5.67e-05
DDR1_cg08951271	MBP_cg06543730	Myelin	0.85	5.5e-09	1.92e-07
DDR1_cg09965419	MBP_cg06543730	Myelin	0.79	3.63e-07	8.37e-06
DDR1_cg11530564	MBP_cg06543730	Myelin	0.91	1.22e-11	9.52e-10
DDR1_cg11676038	MBP_cg06543730	Myelin	0.88	2.78e-10	1.39e-08
DDR1_cg12669395	MBP_cg06543730	Myelin	0.89	1.81e-10	9.5e-09
DDR1_cg13329862	MBP_cg06543730	Myelin	0.83	2.76e-08	8.11e-07
DDR1_cg13351860	MBP_cg06543730	Myelin	0.87	7.68e-10	3.34e-08
DDR1_cg13695585	MBP_cg06543730	Myelin	0.77	1.1e-06	2.25e-05
DDR1_cg14790552	MBP_cg06543730	Myelin	0.88	2.24e-10	1.15e-08
DDR1_cg15656686	MBP_cg06543730	Myelin	0.85	5.73e-09	1.99e-07
DDR1_cg16111190	MBP_cg06543730	Myelin	0.82	6.52e-08	1.77e-06
DDR1_cg16797094	MBP_cg06543730	Myelin	0.9	5.06e-11	3.18e-09
DDR1_cg17176005	MBP_cg06543730	Myelin	0.84	9.65e-09	3.17e-07
DDR1_cg17604312	MBP_cg06543730	Myelin	0.88	3.09e-10	1.52e-08
DDR1_cg19215110	MBP_cg06543730	Myelin	0.75	2.3e-06	4.33e-05
DDR1_cg21677258	MBP_cg06543730	Myelin	0.9	2.54e-11	1.76e-09
DDR1_cg24566261	MBP_cg06543730	Myelin	0.75	2.85e-06	5.22e-05
DDR1_cg24636809	MBP_cg06543730	Myelin	0.83	1.92e-08	5.86e-07
DDR1_cg24727290	MBP_cg06543730	Myelin	0.79	4.19e-07	9.49e-06
DDR1_cg25655106	MBP_cg06543730	Myelin	0.89	7.69e-11	4.57e-09
DDR1_cg27237814	MBP_cg06543730	Myelin	0.85	4.66e-09	1.65e-07
DDR1_cg27593250	MBP_cg06543730	Myelin	0.77	1.07e-06	2.2e-05
DDR1_cg00466425	MBP_cg06548292	Myelin	0.89	1.09e-10	6.12e-09
DDR1_cg01936707	MBP_cg06548292	Myelin	0.87	8.88e-10	3.8e-08
DDR1_cg05703744	MBP_cg06548292	Myelin	0.9	5.06e-11	3.18e-09
DDR1_cg06200824	MBP_cg06548292	Myelin	0.76	1.38e-06	2.76e-05
DDR1_cg06501109	MBP_cg06548292	Myelin	0.77	8.69e-07	1.83e-05
DDR1_cg07912416	MBP_cg06548292	Myelin	0.84	8.92e-09	2.96e-07
DDR1_cg07979747	MBP_cg06548292	Myelin	0.81	1.06e-07	2.74e-06
DDR1_cg08673763	MBP_cg06548292	Myelin	0.89	1.22e-10	6.76e-09
DDR1_cg08951271	MBP_cg06548292	Myelin	0.89	1.22e-10	6.76e-09
DDR1_cg09822812	MBP_cg06548292	Myelin	0.77	1.22e-06	2.47e-05
DDR1_cg09965419	MBP_cg06548292	Myelin	0.77	9.9e-07	2.05e-05
DDR1_cg11530564	MBP_cg06548292	Myelin	0.87	5.43e-10	2.47e-08
DDR1_cg11676038	MBP_cg06548292	Myelin	0.88	3.09e-10	1.52e-08
DDR1_cg12669395	MBP_cg06548292	Myelin	0.9	5.06e-11	3.18e-09
DDR1_cg13329862	MBP_cg06548292	Myelin	0.91	1.06e-11	8.47e-10
DDR1_cg13351860	MBP_cg06548292	Myelin	0.9	2.23e-11	1.58e-09
DDR1_cg14058861	MBP_cg06548292	Myelin	0.83	3.41e-08	9.84e-07
DDR1_cg14790552	MBP_cg06548292	Myelin	0.8	1.8e-07	4.43e-06
DDR1_cg15656686	MBP_cg06548292	Myelin	0.84	1.71e-08	5.3e-07
DDR1_cg16111190	MBP_cg06548292	Myelin	0.85	6.22e-09	2.14e-07
DDR1_cg16797094	MBP_cg06548292	Myelin	0.83	2.66e-08	7.86e-07
DDR1_cg17176005	MBP_cg06548292	Myelin	0.76	1.41e-06	2.82e-05
DDR1_cg17604312	MBP_cg06548292	Myelin	0.78	7.83e-07	1.66e-05
DDR1_cg19215110	MBP_cg06548292	Myelin	0.79	2.81e-07	6.62e-06
DDR1_cg19591099	MBP_cg06548292	Myelin	0.8	1.59e-07	3.97e-06
DDR1_cg21677258	MBP_cg06548292	Myelin	0.86	2.24e-09	8.58e-08
DDR1_cg24636809	MBP_cg06548292	Myelin	0.86	2.34e-09	8.92e-08
DDR1_cg24727290	MBP_cg06548292	Myelin	0.89	6.06e-11	3.72e-09
DDR1_cg25655106	MBP_cg06548292	Myelin	0.9	2.54e-11	1.76e-09
DDR1_cg27237814	MBP_cg06548292	Myelin	0.83	2.39e-08	7.13e-07
DDR1_cg27593250	MBP_cg06548292	Myelin	0.75	3.51e-06	6.27e-05
DDR1_cg00466425	MBP_cg06773488	Myelin	0.85	4.86e-09	1.71e-07
DDR1_cg00934322	MBP_cg06773488	Myelin	0.76	1.85e-06	3.58e-05
DDR1_cg01936707	MBP_cg06773488	Myelin	0.81	1.13e-07	2.9e-06
DDR1_cg05703744	MBP_cg06773488	Myelin	0.84	1e-08	3.29e-07
DDR1_cg06501109	MBP_cg06773488	Myelin	0.81	1.36e-07	3.44e-06
DDR1_cg07912416	MBP_cg06773488	Myelin	0.76	1.38e-06	2.76e-05
DDR1_cg08673763	MBP_cg06773488	Myelin	0.84	1.09e-08	3.52e-07
DDR1_cg08951271	MBP_cg06773488	Myelin	0.85	3.94e-09	1.42e-07
DDR1_cg09822812	MBP_cg06773488	Myelin	0.78	4.81e-07	1.07e-05
DDR1_cg09965419	MBP_cg06773488	Myelin	0.75	3.2e-06	5.78e-05
DDR1_cg11530564	MBP_cg06773488	Myelin	0.88	2.5e-10	1.26e-08
DDR1_cg11676038	MBP_cg06773488	Myelin	0.83	3.18e-08	9.22e-07
DDR1_cg12669395	MBP_cg06773488	Myelin	0.87	1.13e-09	4.68e-08
DDR1_cg12847793	MBP_cg06773488	Myelin	0.77	9.4e-07	1.96e-05
DDR1_cg13329862	MBP_cg06773488	Myelin	0.9	1.71e-11	1.26e-09
DDR1_cg13351860	MBP_cg06773488	Myelin	0.89	1.71e-10	9.06e-09
DDR1_cg13695585	MBP_cg06773488	Myelin	0.79	2.97e-07	6.98e-06
DDR1_cg14790552	MBP_cg06773488	Myelin	0.78	6.67e-07	1.44e-05
DDR1_cg15656686	MBP_cg06773488	Myelin	0.84	9.65e-09	3.17e-07
DDR1_cg16111190	MBP_cg06773488	Myelin	0.81	1.17e-07	2.99e-06
DDR1_cg16797094	MBP_cg06773488	Myelin	0.84	1e-08	3.29e-07
DDR1_cg17604312	MBP_cg06773488	Myelin	0.81	1.32e-07	3.34e-06
DDR1_cg19215110	MBP_cg06773488	Myelin	0.77	1.02e-06	2.1e-05
DDR1_cg19591099	MBP_cg06773488	Myelin	0.78	7.04e-07	1.51e-05
DDR1_cg21677258	MBP_cg06773488	Myelin	0.83	1.99e-08	6.05e-07
DDR1_cg24636809	MBP_cg06773488	Myelin	0.83	1.78e-08	5.48e-07
DDR1_cg24727290	MBP_cg06773488	Myelin	0.87	1.02e-09	4.31e-08
DDR1_cg25655106	MBP_cg06773488	Myelin	0.88	4.44e-10	2.07e-08
DDR1_cg27237814	MBP_cg06773488	Myelin	0.83	2.76e-08	8.11e-07
DDR1_cg00466425	MBP_cg07184627	Myelin	0.77	1.04e-06	2.15e-05
DDR1_cg01598675	MBP_cg07184627	Myelin	0.76	1.64e-06	3.21e-05
DDR1_cg01936707	MBP_cg07184627	Myelin	0.79	3.53e-07	8.16e-06
DDR1_cg05703744	MBP_cg07184627	Myelin	0.8	1.54e-07	3.86e-06
DDR1_cg06200824	MBP_cg07184627	Myelin	0.81	9.34e-08	2.45e-06
DDR1_cg07908039	MBP_cg07184627	Myelin	0.78	6.49e-07	1.41e-05
DDR1_cg07912416	MBP_cg07184627	Myelin	0.84	1.32e-08	4.19e-07
DDR1_cg07979747	MBP_cg07184627	Myelin	0.86	2.34e-09	8.92e-08
DDR1_cg08673763	MBP_cg07184627	Myelin	0.81	1.2e-07	3.07e-06
DDR1_cg08951271	MBP_cg07184627	Myelin	0.88	4.22e-10	1.99e-08
DDR1_cg09810078	MBP_cg07184627	Myelin	0.75	3.51e-06	6.27e-05
DDR1_cg11530564	MBP_cg07184627	Myelin	0.8	2.09e-07	5.07e-06
DDR1_cg11676038	MBP_cg07184627	Myelin	0.8	1.59e-07	3.97e-06
DDR1_cg12669395	MBP_cg07184627	Myelin	0.81	8.48e-08	2.24e-06
DDR1_cg12847793	MBP_cg07184627	Myelin	0.76	1.99e-06	3.82e-05
DDR1_cg13329862	MBP_cg07184627	Myelin	0.86	1.49e-09	5.99e-08
DDR1_cg13351860	MBP_cg07184627	Myelin	0.86	3.18e-09	1.17e-07
DDR1_cg13695585	MBP_cg07184627	Myelin	0.8	2.09e-07	5.07e-06
DDR1_cg14790552	MBP_cg07184627	Myelin	0.78	5.08e-07	1.13e-05
DDR1_cg15656686	MBP_cg07184627	Myelin	0.81	7.44e-08	1.99e-06
DDR1_cg16111190	MBP_cg07184627	Myelin	0.85	5.06e-09	1.78e-07
DDR1_cg16797094	MBP_cg07184627	Myelin	0.82	7.2e-08	1.94e-06
DDR1_cg17176005	MBP_cg07184627	Myelin	0.83	2.39e-08	7.13e-07
DDR1_cg18577693	MBP_cg07184627	Myelin	0.81	1.24e-07	3.16e-06
DDR1_cg19215110	MBP_cg07184627	Myelin	0.8	1.5e-07	3.75e-06
DDR1_cg21677258	MBP_cg07184627	Myelin	0.88	5.17e-10	2.36e-08
DDR1_cg23222808	MBP_cg07184627	Myelin	0.81	1.17e-07	2.99e-06
DDR1_cg24566261	MBP_cg07184627	Myelin	0.77	8.47e-07	1.78e-05
DDR1_cg24636809	MBP_cg07184627	Myelin	0.8	2.03e-07	4.93e-06
DDR1_cg24727290	MBP_cg07184627	Myelin	0.82	4.2e-08	1.19e-06
DDR1_cg25251478	MBP_cg07184627	Myelin	0.77	1.22e-06	2.47e-05
DDR1_cg25613385	MBP_cg07184627	Myelin	0.79	2.73e-07	6.44e-06
DDR1_cg25655106	MBP_cg07184627	Myelin	0.77	8.25e-07	1.74e-05
DDR1_cg27237814	MBP_cg07184627	Myelin	0.84	1.65e-08	5.13e-07
DDR1_cg27593250	MBP_cg07184627	Myelin	0.77	1.34e-06	2.7e-05
DDR1_cg00466425	MBP_cg07611666	Myelin	0.85	6.74e-09	2.3e-07
DDR1_cg00934322	MBP_cg07611666	Myelin	0.75	3.43e-06	6.15e-05
DDR1_cg01936707	MBP_cg07611666	Myelin	0.91	1.14e-11	8.99e-10
DDR1_cg05703744	MBP_cg07611666	Myelin	0.87	5.71e-10	2.58e-08
DDR1_cg06200824	MBP_cg07611666	Myelin	0.8	2.15e-07	5.2e-06
DDR1_cg06501109	MBP_cg07611666	Myelin	0.84	1.09e-08	3.52e-07
DDR1_cg07908039	MBP_cg07611666	Myelin	0.76	1.99e-06	3.82e-05
DDR1_cg07912416	MBP_cg07611666	Myelin	0.88	4.44e-10	2.07e-08
DDR1_cg07979747	MBP_cg07611666	Myelin	0.84	1e-08	3.29e-07
DDR1_cg08673763	MBP_cg07611666	Myelin	0.84	8.92e-09	2.96e-07
DDR1_cg08684361	MBP_cg07611666	Myelin	0.84	1.17e-08	3.77e-07
DDR1_cg08951271	MBP_cg07611666	Myelin	0.91	1.31e-11	1.01e-09
DDR1_cg09965419	MBP_cg07611666	Myelin	0.83	2.22e-08	6.67e-07
DDR1_cg11530564	MBP_cg07611666	Myelin	0.93	1.39e-13	2.37e-11
DDR1_cg11676038	MBP_cg07611666	Myelin	0.88	4.01e-10	1.9e-08
DDR1_cg12669395	MBP_cg07611666	Myelin	0.87	6.63e-10	2.93e-08
DDR1_cg12847793	MBP_cg07611666	Myelin	0.8	2.5e-07	5.95e-06
DDR1_cg13329862	MBP_cg07611666	Myelin	0.91	1.22e-11	9.52e-10
DDR1_cg13351860	MBP_cg07611666	Myelin	0.92	1.65e-12	1.78e-10
DDR1_cg13660719	MBP_cg07611666	Myelin	0.76	1.85e-06	3.58e-05
DDR1_cg13695585	MBP_cg07611666	Myelin	0.77	1.1e-06	2.25e-05
DDR1_cg14790552	MBP_cg07611666	Myelin	0.82	4.5e-08	1.27e-06
DDR1_cg15656686	MBP_cg07611666	Myelin	0.9	1.83e-11	1.33e-09
DDR1_cg16111190	MBP_cg07611666	Myelin	0.88	2.24e-10	1.15e-08
DDR1_cg16797094	MBP_cg07611666	Myelin	0.94	4.51e-14	9.9e-12
DDR1_cg17176005	MBP_cg07611666	Myelin	0.82	5.9e-08	1.62e-06
DDR1_cg17604312	MBP_cg07611666	Myelin	0.83	2.47e-08	7.36e-07
DDR1_cg19215110	MBP_cg07611666	Myelin	0.75	3.27e-06	5.9e-05
DDR1_cg19591099	MBP_cg07611666	Myelin	0.77	1.31e-06	2.64e-05
DDR1_cg21677258	MBP_cg07611666	Myelin	0.92	3.34e-12	3.17e-10
DDR1_cg23222808	MBP_cg07611666	Myelin	0.76	2.2e-06	4.15e-05
DDR1_cg24636809	MBP_cg07611666	Myelin	0.88	2.24e-10	1.15e-08
DDR1_cg24727290	MBP_cg07611666	Myelin	0.86	1.49e-09	5.99e-08
DDR1_cg25613385	MBP_cg07611666	Myelin	0.84	9.65e-09	3.17e-07
DDR1_cg25655106	MBP_cg07611666	Myelin	0.9	1.71e-11	1.26e-09
DDR1_cg27237814	MBP_cg07611666	Myelin	0.84	8.24e-09	2.76e-07
DDR1_cg27593250	MBP_cg07611666	Myelin	0.78	7.23e-07	1.55e-05
DDR1_cg00466425	MBP_cg08093733	Myelin	0.9	2.71e-11	1.85e-09
DDR1_cg01598675	MBP_cg08093733	Myelin	0.83	2.96e-08	8.66e-07
DDR1_cg01936707	MBP_cg08093733	Myelin	0.85	4.86e-09	1.71e-07
DDR1_cg05703744	MBP_cg08093733	Myelin	0.84	1.32e-08	4.19e-07
DDR1_cg06200824	MBP_cg08093733	Myelin	0.77	1.18e-06	2.41e-05
DDR1_cg06501109	MBP_cg08093733	Myelin	0.82	4.5e-08	1.27e-06
DDR1_cg07912416	MBP_cg08093733	Myelin	0.85	7.31e-09	2.47e-07
DDR1_cg07979747	MBP_cg08093733	Myelin	0.84	1.37e-08	4.33e-07
DDR1_cg08673763	MBP_cg08093733	Myelin	0.89	8.16e-11	4.81e-09
DDR1_cg08951271	MBP_cg08093733	Myelin	0.91	1.4e-11	1.06e-09
DDR1_cg11530564	MBP_cg08093733	Myelin	0.85	4.66e-09	1.65e-07
DDR1_cg11676038	MBP_cg08093733	Myelin	0.89	1.62e-10	8.64e-09
DDR1_cg12669395	MBP_cg08093733	Myelin	0.88	2.01e-10	1.05e-08
DDR1_cg12847793	MBP_cg08093733	Myelin	0.75	3.13e-06	5.67e-05
DDR1_cg13329862	MBP_cg08093733	Myelin	0.93	2.7e-13	4.02e-11
DDR1_cg13351860	MBP_cg08093733	Myelin	0.87	1.13e-09	4.68e-08
DDR1_cg14058861	MBP_cg08093733	Myelin	0.79	3.15e-07	7.35e-06
DDR1_cg14790552	MBP_cg08093733	Myelin	0.84	8.24e-09	2.76e-07
DDR1_cg15656686	MBP_cg08093733	Myelin	0.85	5.97e-09	2.06e-07
DDR1_cg16111190	MBP_cg08093733	Myelin	0.83	2.47e-08	7.36e-07
DDR1_cg16797094	MBP_cg08093733	Myelin	0.84	8.92e-09	2.96e-07
DDR1_cg17176005	MBP_cg08093733	Myelin	0.78	7.23e-07	1.55e-05
DDR1_cg17604312	MBP_cg08093733	Myelin	0.82	4.06e-08	1.15e-06
DDR1_cg19215110	MBP_cg08093733	Myelin	0.79	4.43e-07	9.98e-06
DDR1_cg19591099	MBP_cg08093733	Myelin	0.79	3.85e-07	8.81e-06
DDR1_cg21677258	MBP_cg08093733	Myelin	0.87	7.68e-10	3.34e-08
DDR1_cg24636809	MBP_cg08093733	Myelin	0.87	1.36e-09	5.52e-08
DDR1_cg24727290	MBP_cg08093733	Myelin	0.86	1.56e-09	6.24e-08
DDR1_cg25655106	MBP_cg08093733	Myelin	0.94	1.31e-14	3.81e-12
DDR1_cg27237814	MBP_cg08093733	Myelin	0.92	2.86e-12	2.79e-10
DDR1_cg27593250	MBP_cg08093733	Myelin	0.76	1.52e-06	3.01e-05
DDR1_cg00466425	MBP_cg08176598	Myelin	0.92	3.6e-12	3.37e-10
DDR1_cg01598675	MBP_cg08176598	Myelin	0.75	2.36e-06	4.42e-05
DDR1_cg01936707	MBP_cg08176598	Myelin	0.91	3.88e-12	3.59e-10
DDR1_cg05703744	MBP_cg08176598	Myelin	0.93	6.06e-13	7.8e-11
DDR1_cg06200824	MBP_cg08176598	Myelin	0.83	2.22e-08	6.67e-07
DDR1_cg06501109	MBP_cg08176598	Myelin	0.81	7.69e-08	2.05e-06
DDR1_cg07908039	MBP_cg08176598	Myelin	0.76	1.52e-06	3.01e-05
DDR1_cg07912416	MBP_cg08176598	Myelin	0.91	8.05e-12	6.68e-10
DDR1_cg07979747	MBP_cg08176598	Myelin	0.92	2.45e-12	2.47e-10
DDR1_cg08673763	MBP_cg08176598	Myelin	0.89	7.69e-11	4.57e-09
DDR1_cg08684361	MBP_cg08176598	Myelin	0.76	2.2e-06	4.15e-05
DDR1_cg08951271	MBP_cg08176598	Myelin	0.94	2.33e-14	5.92e-12
DDR1_cg09965419	MBP_cg08176598	Myelin	0.78	5.83e-07	1.28e-05
DDR1_cg11530564	MBP_cg08176598	Myelin	0.93	3.24e-13	4.65e-11
DDR1_cg11676038	MBP_cg08176598	Myelin	0.94	9.33e-14	1.74e-11
DDR1_cg12669395	MBP_cg08176598	Myelin	0.95	3.33e-15	1.4e-12
DDR1_cg13329862	MBP_cg08176598	Myelin	0.93	6.61e-13	8.36e-11
DDR1_cg13351860	MBP_cg08176598	Myelin	0.92	7.84e-13	9.64e-11
DDR1_cg14058861	MBP_cg08176598	Myelin	0.81	1.32e-07	3.34e-06
DDR1_cg14790552	MBP_cg08176598	Myelin	0.88	5.17e-10	2.36e-08
DDR1_cg15656686	MBP_cg08176598	Myelin	0.91	1.31e-11	1.01e-09
DDR1_cg15720085	MBP_cg08176598	Myelin	0.8	2.29e-07	5.5e-06
DDR1_cg16111190	MBP_cg08176598	Myelin	0.9	5.37e-11	3.35e-09
DDR1_cg16797094	MBP_cg08176598	Myelin	0.9	2.09e-11	1.49e-09
DDR1_cg17176005	MBP_cg08176598	Myelin	0.84	1.53e-08	4.79e-07
DDR1_cg17604312	MBP_cg08176598	Myelin	0.84	1e-08	3.29e-07
DDR1_cg18577693	MBP_cg08176598	Myelin	0.79	2.97e-07	6.98e-06
DDR1_cg19215110	MBP_cg08176598	Myelin	0.81	9.05e-08	2.38e-06
DDR1_cg19591099	MBP_cg08176598	Myelin	0.84	8.92e-09	2.96e-07
DDR1_cg21677258	MBP_cg08176598	Myelin	0.94	1.47e-14	4.13e-12
DDR1_cg24636809	MBP_cg08176598	Myelin	0.93	3.89e-13	5.41e-11
DDR1_cg24727290	MBP_cg08176598	Myelin	0.87	1.18e-09	4.87e-08
DDR1_cg25613385	MBP_cg08176598	Myelin	0.77	8.69e-07	1.83e-05
DDR1_cg25655106	MBP_cg08176598	Myelin	0.94	2.93e-14	7.05e-12
DDR1_cg27237814	MBP_cg08176598	Myelin	0.9	5.06e-11	3.18e-09
DDR1_cg27593250	MBP_cg08176598	Myelin	0.77	1.13e-06	2.3e-05
DDR1_cg00466425	MBP_cg08936202	Myelin	0.87	8.06e-10	3.49e-08
DDR1_cg01936707	MBP_cg08936202	Myelin	0.9	1.83e-11	1.33e-09
DDR1_cg05703744	MBP_cg08936202	Myelin	0.92	7.84e-13	9.64e-11
DDR1_cg06200824	MBP_cg08936202	Myelin	0.77	1.15e-06	2.36e-05
DDR1_cg06501109	MBP_cg08936202	Myelin	0.83	2.47e-08	7.36e-07
DDR1_cg07908039	MBP_cg08936202	Myelin	0.78	7.04e-07	1.51e-05
DDR1_cg07912416	MBP_cg08936202	Myelin	0.84	9.28e-09	3.06e-07
DDR1_cg07979747	MBP_cg08936202	Myelin	0.87	1.42e-09	5.75e-08
DDR1_cg08673763	MBP_cg08936202	Myelin	0.85	7.02e-09	2.39e-07
DDR1_cg08951271	MBP_cg08936202	Myelin	0.91	9.26e-12	7.51e-10
DDR1_cg09965419	MBP_cg08936202	Myelin	0.79	4.19e-07	9.49e-06
DDR1_cg11530564	MBP_cg08936202	Myelin	0.95	3.11e-15	1.36e-12
DDR1_cg11676038	MBP_cg08936202	Myelin	0.94	2.93e-14	7.05e-12
DDR1_cg12669395	MBP_cg08936202	Myelin	0.94	1.87e-14	5e-12
DDR1_cg12847793	MBP_cg08936202	Myelin	0.75	3.35e-06	6.02e-05
DDR1_cg13329862	MBP_cg08936202	Myelin	0.88	2.01e-10	1.05e-08
DDR1_cg13351860	MBP_cg08936202	Myelin	0.9	1.6e-11	1.19e-09
DDR1_cg13695585	MBP_cg08936202	Myelin	0.78	6.49e-07	1.41e-05
DDR1_cg14790552	MBP_cg08936202	Myelin	0.88	3.09e-10	1.52e-08
DDR1_cg15656686	MBP_cg08936202	Myelin	0.9	4.76e-11	3.02e-09
DDR1_cg16111190	MBP_cg08936202	Myelin	0.85	7.31e-09	2.47e-07
DDR1_cg16797094	MBP_cg08936202	Myelin	0.92	1.94e-12	2.03e-10
DDR1_cg17176005	MBP_cg08936202	Myelin	0.8	1.97e-07	4.8e-06
DDR1_cg17604312	MBP_cg08936202	Myelin	0.85	4.66e-09	1.65e-07
DDR1_cg19215110	MBP_cg08936202	Myelin	0.76	1.99e-06	3.82e-05
DDR1_cg19591099	MBP_cg08936202	Myelin	0.82	6.31e-08	1.72e-06
DDR1_cg21677258	MBP_cg08936202	Myelin	0.92	1.65e-12	1.78e-10
DDR1_cg24566261	MBP_cg08936202	Myelin	0.75	2.47e-06	4.61e-05
DDR1_cg24636809	MBP_cg08936202	Myelin	0.89	8.65e-11	5.05e-09
DDR1_cg24727290	MBP_cg08936202	Myelin	0.81	1.32e-07	3.34e-06
DDR1_cg25613385	MBP_cg08936202	Myelin	0.77	1.1e-06	2.25e-05
DDR1_cg25655106	MBP_cg08936202	Myelin	0.92	3.34e-12	3.17e-10
DDR1_cg27237814	MBP_cg08936202	Myelin	0.86	2.79e-09	1.04e-07
DDR1_cg27593250	MBP_cg08936202	Myelin	0.77	9.4e-07	1.96e-05
DDR1_cg00466425	MBP_cg11195910	Myelin	0.86	1.63e-09	6.49e-08
DDR1_cg00934322	MBP_cg11195910	Myelin	0.77	1.22e-06	2.47e-05
DDR1_cg01936707	MBP_cg11195910	Myelin	0.89	8.65e-11	5.05e-09
DDR1_cg05703744	MBP_cg11195910	Myelin	0.93	1.39e-13	2.37e-11
DDR1_cg06501109	MBP_cg11195910	Myelin	0.81	8.76e-08	2.31e-06
DDR1_cg07908039	MBP_cg11195910	Myelin	0.76	1.99e-06	3.82e-05
DDR1_cg07912416	MBP_cg11195910	Myelin	0.82	4.99e-08	1.39e-06
DDR1_cg07979747	MBP_cg11195910	Myelin	0.81	8.76e-08	2.31e-06
DDR1_cg08673763	MBP_cg11195910	Myelin	0.88	4.91e-10	2.26e-08
DDR1_cg08951271	MBP_cg11195910	Myelin	0.89	6.44e-11	3.93e-09
DDR1_cg09965419	MBP_cg11195910	Myelin	0.77	8.03e-07	1.7e-05
DDR1_cg11530564	MBP_cg11195910	Myelin	0.95	1.15e-14	3.44e-12
DDR1_cg11676038	MBP_cg11195910	Myelin	0.9	3.95e-11	2.57e-09
DDR1_cg12669395	MBP_cg11195910	Myelin	0.92	1.79e-12	1.9e-10
DDR1_cg13329862	MBP_cg11195910	Myelin	0.9	2.71e-11	1.85e-09
DDR1_cg13351860	MBP_cg11195910	Myelin	0.91	8.05e-12	6.68e-10
DDR1_cg13695585	MBP_cg11195910	Myelin	0.76	1.64e-06	3.21e-05
DDR1_cg14790552	MBP_cg11195910	Myelin	0.87	5.43e-10	2.47e-08
DDR1_cg15656686	MBP_cg11195910	Myelin	0.87	1.42e-09	5.75e-08
DDR1_cg16111190	MBP_cg11195910	Myelin	0.88	2.93e-10	1.45e-08
DDR1_cg16797094	MBP_cg11195910	Myelin	0.9	1.6e-11	1.19e-09
DDR1_cg17176005	MBP_cg11195910	Myelin	0.8	1.64e-07	4.08e-06
DDR1_cg17604312	MBP_cg11195910	Myelin	0.82	6.74e-08	1.82e-06
DDR1_cg19215110	MBP_cg11195910	Myelin	0.76	1.99e-06	3.82e-05
DDR1_cg19591099	MBP_cg11195910	Myelin	0.77	8.25e-07	1.74e-05
DDR1_cg21677258	MBP_cg11195910	Myelin	0.9	2.54e-11	1.76e-09
DDR1_cg24636809	MBP_cg11195910	Myelin	0.86	1.63e-09	6.49e-08
DDR1_cg24727290	MBP_cg11195910	Myelin	0.82	5.16e-08	1.43e-06
DDR1_cg25655106	MBP_cg11195910	Myelin	0.92	3.34e-12	3.17e-10
DDR1_cg27237814	MBP_cg11195910	Myelin	0.87	1.07e-09	4.49e-08
DDR1_cg27593250	MBP_cg11195910	Myelin	0.81	1.36e-07	3.44e-06
DDR1_cg07908039	MBP_cg12979350	Myelin	0.8	2.5e-07	5.95e-06
DDR1_cg08673763	MBP_cg12979350	Myelin	0.8	2.57e-07	6.12e-06
DDR1_cg13329862	MBP_cg12979350	Myelin	0.77	9.16e-07	1.91e-05
DDR1_cg16111190	MBP_cg12979350	Myelin	0.75	2.85e-06	5.22e-05
DDR1_cg17604312	MBP_cg12979350	Myelin	0.76	2.04e-06	3.9e-05
DDR1_cg19215110	MBP_cg12979350	Myelin	0.83	2.66e-08	7.86e-07
DDR1_cg24727290	MBP_cg12979350	Myelin	0.75	3.2e-06	5.78e-05
DDR1_cg00466425	MBP_cg13141061	Myelin	0.89	1.29e-10	7.09e-09
DDR1_cg01936707	MBP_cg13141061	Myelin	0.88	4.22e-10	1.99e-08
DDR1_cg05703744	MBP_cg13141061	Myelin	0.9	2.88e-11	1.96e-09
DDR1_cg06200824	MBP_cg13141061	Myelin	0.79	3.53e-07	8.16e-06
DDR1_cg06501109	MBP_cg13141061	Myelin	0.78	6.32e-07	1.37e-05
DDR1_cg07912416	MBP_cg13141061	Myelin	0.89	1.15e-10	6.43e-09
DDR1_cg07979747	MBP_cg13141061	Myelin	0.87	9.31e-10	3.96e-08
DDR1_cg08673763	MBP_cg13141061	Myelin	0.88	2.37e-10	1.2e-08
DDR1_cg08684361	MBP_cg13141061	Myelin	0.78	7.62e-07	1.62e-05
DDR1_cg08951271	MBP_cg13141061	Myelin	0.94	1.64e-14	4.5e-12
DDR1_cg09965419	MBP_cg13141061	Myelin	0.79	3.24e-07	7.55e-06
DDR1_cg11530564	MBP_cg13141061	Myelin	0.95	1.15e-14	3.44e-12
DDR1_cg11676038	MBP_cg13141061	Myelin	0.9	2.09e-11	1.49e-09
DDR1_cg12669395	MBP_cg13141061	Myelin	0.9	3.28e-11	2.19e-09
DDR1_cg12847793	MBP_cg13141061	Myelin	0.77	1.25e-06	2.52e-05
DDR1_cg13329862	MBP_cg13141061	Myelin	0.9	1.71e-11	1.26e-09
DDR1_cg13351860	MBP_cg13141061	Myelin	0.95	3.77e-15	1.53e-12
DDR1_cg13695585	MBP_cg13141061	Myelin	0.77	1.34e-06	2.7e-05
DDR1_cg14790552	MBP_cg13141061	Myelin	0.88	3.61e-10	1.73e-08
DDR1_cg15656686	MBP_cg13141061	Myelin	0.88	3.61e-10	1.73e-08
DDR1_cg15720085	MBP_cg13141061	Myelin	0.75	2.59e-06	4.8e-05
DDR1_cg16111190	MBP_cg13141061	Myelin	0.85	4.28e-09	1.53e-07
DDR1_cg16797094	MBP_cg13141061	Myelin	0.91	7.49e-12	6.29e-10
DDR1_cg17176005	MBP_cg13141061	Myelin	0.84	1.47e-08	4.63e-07
DDR1_cg17604312	MBP_cg13141061	Myelin	0.77	8.03e-07	1.7e-05
DDR1_cg18577693	MBP_cg13141061	Myelin	0.81	9.96e-08	2.59e-06
DDR1_cg19215110	MBP_cg13141061	Myelin	0.76	1.81e-06	3.5e-05
DDR1_cg19591099	MBP_cg13141061	Myelin	0.79	3.34e-07	7.75e-06
DDR1_cg21677258	MBP_cg13141061	Myelin	0.93	1.53e-13	2.55e-11
DDR1_cg24636809	MBP_cg13141061	Myelin	0.91	9.26e-12	7.51e-10
DDR1_cg24727290	MBP_cg13141061	Myelin	0.87	8.06e-10	3.49e-08
DDR1_cg25613385	MBP_cg13141061	Myelin	0.8	1.41e-07	3.54e-06
DDR1_cg25655106	MBP_cg13141061	Myelin	0.9	1.83e-11	1.33e-09
DDR1_cg27237814	MBP_cg13141061	Myelin	0.89	6.44e-11	3.93e-09
DDR1_cg27593250	MBP_cg13141061	Myelin	0.81	1.17e-07	2.99e-06
DDR1_cg00466425	MBP_cg13375905	Myelin	0.77	8.25e-07	1.74e-05
DDR1_cg01936707	MBP_cg13375905	Myelin	0.78	5.67e-07	1.25e-05
DDR1_cg05703744	MBP_cg13375905	Myelin	0.83	3.53e-08	1.02e-06
DDR1_cg07979747	MBP_cg13375905	Myelin	0.75	2.65e-06	4.91e-05
DDR1_cg08951271	MBP_cg13375905	Myelin	0.78	5.37e-07	1.19e-05
DDR1_cg11530564	MBP_cg13375905	Myelin	0.8	1.45e-07	3.64e-06
DDR1_cg11676038	MBP_cg13375905	Myelin	0.79	2.81e-07	6.62e-06
DDR1_cg12669395	MBP_cg13375905	Myelin	0.82	5.71e-08	1.57e-06
DDR1_cg13329862	MBP_cg13375905	Myelin	0.81	7.95e-08	2.11e-06
DDR1_cg13351860	MBP_cg13375905	Myelin	0.82	6.31e-08	1.72e-06
DDR1_cg15656686	MBP_cg13375905	Myelin	0.79	4.19e-07	9.49e-06
DDR1_cg16111190	MBP_cg13375905	Myelin	0.76	1.41e-06	2.82e-05
DDR1_cg16797094	MBP_cg13375905	Myelin	0.75	2.78e-06	5.11e-05
DDR1_cg21677258	MBP_cg13375905	Myelin	0.76	1.64e-06	3.21e-05
DDR1_cg24636809	MBP_cg13375905	Myelin	0.79	4.3e-07	9.73e-06
DDR1_cg25655106	MBP_cg13375905	Myelin	0.76	1.41e-06	2.82e-05
DDR1_cg27237814	MBP_cg13375905	Myelin	0.75	2.91e-06	5.32e-05
DDR1_cg00466425	MBP_cg13442966	Myelin	0.88	4.22e-10	1.99e-08
DDR1_cg00934322	MBP_cg13442966	Myelin	0.77	1.02e-06	2.1e-05
DDR1_cg01936707	MBP_cg13442966	Myelin	0.92	2.1e-12	2.17e-10
DDR1_cg05703744	MBP_cg13442966	Myelin	0.91	1.31e-11	1.01e-09
DDR1_cg06200824	MBP_cg13442966	Myelin	0.77	1.31e-06	2.64e-05
DDR1_cg06501109	MBP_cg13442966	Myelin	0.85	6.22e-09	2.14e-07
DDR1_cg07912416	MBP_cg13442966	Myelin	0.86	1.96e-09	7.64e-08
DDR1_cg07979747	MBP_cg13442966	Myelin	0.84	1.42e-08	4.48e-07
DDR1_cg08673763	MBP_cg13442966	Myelin	0.88	4.22e-10	1.99e-08
DDR1_cg08684361	MBP_cg13442966	Myelin	0.76	1.38e-06	2.76e-05
DDR1_cg08951271	MBP_cg13442966	Myelin	0.92	2.27e-12	2.31e-10
DDR1_cg09822812	MBP_cg13442966	Myelin	0.75	3.35e-06	6.02e-05
DDR1_cg09965419	MBP_cg13442966	Myelin	0.78	5.99e-07	1.31e-05
DDR1_cg11530564	MBP_cg13442966	Myelin	0.93	1.26e-13	2.2e-11
DDR1_cg11676038	MBP_cg13442966	Myelin	0.93	3.55e-13	5.01e-11
DDR1_cg12669395	MBP_cg13442966	Myelin	0.91	4.18e-12	3.82e-10
DDR1_cg12847793	MBP_cg13442966	Myelin	0.79	4.07e-07	9.25e-06
DDR1_cg13329862	MBP_cg13442966	Myelin	0.92	1.19e-12	1.36e-10
DDR1_cg13351860	MBP_cg13442966	Myelin	0.93	6.61e-13	8.36e-11
DDR1_cg14058861	MBP_cg13442966	Myelin	0.78	5.67e-07	1.25e-05
DDR1_cg14790552	MBP_cg13442966	Myelin	0.84	1.04e-08	3.4e-07
DDR1_cg15656686	MBP_cg13442966	Myelin	0.87	1.24e-09	5.08e-08
DDR1_cg16111190	MBP_cg13442966	Myelin	0.88	3.43e-10	1.66e-08
DDR1_cg16797094	MBP_cg13442966	Myelin	0.92	1.1e-12	1.27e-10
DDR1_cg17176005	MBP_cg13442966	Myelin	0.79	3.74e-07	8.58e-06
DDR1_cg17604312	MBP_cg13442966	Myelin	0.84	1.42e-08	4.48e-07
DDR1_cg19215110	MBP_cg13442966	Myelin	0.8	2.15e-07	5.2e-06
DDR1_cg19591099	MBP_cg13442966	Myelin	0.82	7.2e-08	1.94e-06
DDR1_cg21677258	MBP_cg13442966	Myelin	0.9	3.95e-11	2.57e-09
DDR1_cg24636809	MBP_cg13442966	Myelin	0.89	9.17e-11	5.29e-09
DDR1_cg24727290	MBP_cg13442966	Myelin	0.88	2.01e-10	1.05e-08
DDR1_cg25613385	MBP_cg13442966	Myelin	0.76	1.56e-06	3.07e-05
DDR1_cg25655106	MBP_cg13442966	Myelin	0.93	7.2e-13	8.96e-11
DDR1_cg27237814	MBP_cg13442966	Myelin	0.86	2.34e-09	8.92e-08
DDR1_cg27593250	MBP_cg13442966	Myelin	0.79	2.65e-07	6.28e-06
DDR1_cg00466425	MBP_cg13515395	Myelin	0.78	5.67e-07	1.25e-05
DDR1_cg01598675	MBP_cg13515395	Myelin	0.8	2.29e-07	5.5e-06
DDR1_cg01936707	MBP_cg13515395	Myelin	0.81	1.17e-07	2.99e-06
DDR1_cg05703744	MBP_cg13515395	Myelin	0.81	9.05e-08	2.38e-06
DDR1_cg06501109	MBP_cg13515395	Myelin	0.77	1.28e-06	2.58e-05
DDR1_cg07912416	MBP_cg13515395	Myelin	0.83	3.41e-08	9.84e-07
DDR1_cg07979747	MBP_cg13515395	Myelin	0.85	5.28e-09	1.85e-07
DDR1_cg08673763	MBP_cg13515395	Myelin	0.78	6.67e-07	1.44e-05
DDR1_cg08684361	MBP_cg13515395	Myelin	0.75	2.98e-06	5.43e-05
DDR1_cg08951271	MBP_cg13515395	Myelin	0.87	5.43e-10	2.47e-08
DDR1_cg11530564	MBP_cg13515395	Myelin	0.82	3.92e-08	1.12e-06
DDR1_cg11676038	MBP_cg13515395	Myelin	0.84	1.53e-08	4.79e-07
DDR1_cg12669395	MBP_cg13515395	Myelin	0.82	4.66e-08	1.31e-06
DDR1_cg13329862	MBP_cg13515395	Myelin	0.86	3.46e-09	1.27e-07
DDR1_cg13351860	MBP_cg13515395	Myelin	0.84	1.47e-08	4.63e-07
DDR1_cg13695585	MBP_cg13515395	Myelin	0.75	2.25e-06	4.24e-05
DDR1_cg14790552	MBP_cg13515395	Myelin	0.84	1.59e-08	4.96e-07
DDR1_cg15656686	MBP_cg13515395	Myelin	0.84	1e-08	3.29e-07
DDR1_cg16111190	MBP_cg13515395	Myelin	0.79	3.06e-07	7.17e-06
DDR1_cg16797094	MBP_cg13515395	Myelin	0.86	2.14e-09	8.25e-08
DDR1_cg17176005	MBP_cg13515395	Myelin	0.83	1.85e-08	5.67e-07
DDR1_cg21677258	MBP_cg13515395	Myelin	0.85	4.28e-09	1.53e-07
DDR1_cg24636809	MBP_cg13515395	Myelin	0.78	5.83e-07	1.28e-05
DDR1_cg24727290	MBP_cg13515395	Myelin	0.76	1.77e-06	3.43e-05
DDR1_cg25613385	MBP_cg13515395	Myelin	0.75	3.43e-06	6.15e-05
DDR1_cg25655106	MBP_cg13515395	Myelin	0.82	5.16e-08	1.43e-06
DDR1_cg27237814	MBP_cg13515395	Myelin	0.86	3.18e-09	1.17e-07
DDR1_cg00466425	MBP_cg13807269	Myelin	0.91	6.98e-12	5.91e-10
DDR1_cg00934322	MBP_cg13807269	Myelin	0.77	1.34e-06	2.7e-05
DDR1_cg01598675	MBP_cg13807269	Myelin	0.77	1.34e-06	2.7e-05
DDR1_cg01936707	MBP_cg13807269	Myelin	0.88	3.09e-10	1.52e-08
DDR1_cg05703744	MBP_cg13807269	Myelin	0.95	5.77e-15	2.11e-12
DDR1_cg06200824	MBP_cg13807269	Myelin	0.8	1.59e-07	3.97e-06
DDR1_cg06501109	MBP_cg13807269	Myelin	0.8	1.64e-07	4.08e-06
DDR1_cg07912416	MBP_cg13807269	Myelin	0.86	2.79e-09	1.04e-07
DDR1_cg07979747	MBP_cg13807269	Myelin	0.88	4.91e-10	2.26e-08
DDR1_cg08673763	MBP_cg13807269	Myelin	0.87	1.02e-09	4.31e-08
DDR1_cg08951271	MBP_cg13807269	Myelin	0.93	6.61e-13	8.36e-11
DDR1_cg09965419	MBP_cg13807269	Myelin	0.79	3.06e-07	7.17e-06
DDR1_cg11530564	MBP_cg13807269	Myelin	0.91	3.88e-12	3.59e-10
DDR1_cg11676038	MBP_cg13807269	Myelin	0.95	1.11e-15	6.4e-13
DDR1_cg12669395	MBP_cg13807269	Myelin	0.91	6.04e-12	5.23e-10
DDR1_cg12847793	MBP_cg13807269	Myelin	0.75	3.2e-06	5.78e-05
DDR1_cg13329862	MBP_cg13807269	Myelin	0.94	4.51e-14	9.9e-12
DDR1_cg13351860	MBP_cg13807269	Myelin	0.92	1.65e-12	1.78e-10
DDR1_cg14058861	MBP_cg13807269	Myelin	0.78	6.49e-07	1.41e-05
DDR1_cg14790552	MBP_cg13807269	Myelin	0.89	1.15e-10	6.43e-09
DDR1_cg15656686	MBP_cg13807269	Myelin	0.88	4.67e-10	2.17e-08
DDR1_cg16111190	MBP_cg13807269	Myelin	0.86	2.05e-09	7.94e-08
DDR1_cg16797094	MBP_cg13807269	Myelin	0.91	9.93e-12	7.98e-10
DDR1_cg17176005	MBP_cg13807269	Myelin	0.83	2.96e-08	8.66e-07
DDR1_cg17604312	MBP_cg13807269	Myelin	0.8	1.8e-07	4.43e-06
DDR1_cg19215110	MBP_cg13807269	Myelin	0.81	9.34e-08	2.45e-06
DDR1_cg19591099	MBP_cg13807269	Myelin	0.87	1.42e-09	5.75e-08
DDR1_cg21677258	MBP_cg13807269	Myelin	0.9	1.83e-11	1.33e-09
DDR1_cg24566261	MBP_cg13807269	Myelin	0.76	1.81e-06	3.5e-05
DDR1_cg24636809	MBP_cg13807269	Myelin	0.91	1.4e-11	1.06e-09
DDR1_cg24727290	MBP_cg13807269	Myelin	0.85	4.66e-09	1.65e-07
DDR1_cg25613385	MBP_cg13807269	Myelin	0.76	2.14e-06	4.06e-05
DDR1_cg25655106	MBP_cg13807269	Myelin	0.9	1.83e-11	1.33e-09
DDR1_cg27237814	MBP_cg13807269	Myelin	0.92	2.86e-12	2.79e-10
DDR1_cg27593250	MBP_cg13807269	Myelin	0.86	3.18e-09	1.17e-07
DDR1_cg00466425	MBP_cg14078587	Myelin	0.9	1.71e-11	1.26e-09
DDR1_cg00934322	MBP_cg14078587	Myelin	0.76	1.41e-06	2.82e-05
DDR1_cg01936707	MBP_cg14078587	Myelin	0.89	1.45e-10	7.83e-09
DDR1_cg05703744	MBP_cg14078587	Myelin	0.94	2.93e-14	7.05e-12
DDR1_cg06200824	MBP_cg14078587	Myelin	0.8	1.54e-07	3.86e-06
DDR1_cg06501109	MBP_cg14078587	Myelin	0.8	2.03e-07	4.93e-06
DDR1_cg07912416	MBP_cg14078587	Myelin	0.84	1.47e-08	4.63e-07
DDR1_cg07979747	MBP_cg14078587	Myelin	0.84	1.13e-08	3.65e-07
DDR1_cg08673763	MBP_cg14078587	Myelin	0.86	3.18e-09	1.17e-07
DDR1_cg08951271	MBP_cg14078587	Myelin	0.9	2.38e-11	1.66e-09
DDR1_cg09965419	MBP_cg14078587	Myelin	0.78	6.85e-07	1.48e-05
DDR1_cg11530564	MBP_cg14078587	Myelin	0.91	5.62e-12	4.93e-10
DDR1_cg11676038	MBP_cg14078587	Myelin	0.93	1.14e-13	2.04e-11
DDR1_cg12669395	MBP_cg14078587	Myelin	0.94	2.09e-14	5.43e-12
DDR1_cg12847793	MBP_cg14078587	Myelin	0.76	2.04e-06	3.9e-05
DDR1_cg13329862	MBP_cg14078587	Myelin	0.93	3.89e-13	5.41e-11
DDR1_cg13351860	MBP_cg14078587	Myelin	0.91	7.49e-12	6.29e-10
DDR1_cg14058861	MBP_cg14078587	Myelin	0.75	2.47e-06	4.61e-05
DDR1_cg14790552	MBP_cg14078587	Myelin	0.85	7.61e-09	2.56e-07
DDR1_cg15656686	MBP_cg14078587	Myelin	0.89	1.09e-10	6.12e-09
DDR1_cg16111190	MBP_cg14078587	Myelin	0.88	3.09e-10	1.52e-08
DDR1_cg16797094	MBP_cg14078587	Myelin	0.89	7.25e-11	4.36e-09
DDR1_cg17176005	MBP_cg14078587	Myelin	0.79	4.55e-07	1.02e-05
DDR1_cg17604312	MBP_cg14078587	Myelin	0.81	7.44e-08	1.99e-06
DDR1_cg19215110	MBP_cg14078587	Myelin	0.8	2.35e-07	5.65e-06
DDR1_cg19591099	MBP_cg14078587	Myelin	0.86	2.24e-09	8.58e-08
DDR1_cg21677258	MBP_cg14078587	Myelin	0.88	3.43e-10	1.66e-08
DDR1_cg24636809	MBP_cg14078587	Myelin	0.9	1.83e-11	1.33e-09
DDR1_cg24727290	MBP_cg14078587	Myelin	0.85	7.92e-09	2.66e-07
DDR1_cg25655106	MBP_cg14078587	Myelin	0.9	3.49e-11	2.31e-09
DDR1_cg27237814	MBP_cg14078587	Myelin	0.89	1.71e-10	9.06e-09
DDR1_cg27593250	MBP_cg14078587	Myelin	0.79	3.96e-07	9.02e-06
DDR1_cg00466425	MBP_cg14298244	Myelin	0.86	1.56e-09	6.24e-08
DDR1_cg01936707	MBP_cg14298244	Myelin	0.83	1.99e-08	6.05e-07
DDR1_cg05703744	MBP_cg14298244	Myelin	0.89	1.03e-10	5.83e-09
DDR1_cg06501109	MBP_cg14298244	Myelin	0.79	3.53e-07	8.16e-06
DDR1_cg07912416	MBP_cg14298244	Myelin	0.86	3.04e-09	1.13e-07
DDR1_cg07979747	MBP_cg14298244	Myelin	0.81	8.21e-08	2.18e-06
DDR1_cg08673763	MBP_cg14298244	Myelin	0.86	1.56e-09	6.24e-08
DDR1_cg08951271	MBP_cg14298244	Myelin	0.9	1.95e-11	1.41e-09
DDR1_cg09822812	MBP_cg14298244	Myelin	0.79	3.74e-07	8.58e-06
DDR1_cg09965419	MBP_cg14298244	Myelin	0.78	6.49e-07	1.41e-05
DDR1_cg11530564	MBP_cg14298244	Myelin	0.92	3.6e-12	3.37e-10
DDR1_cg11676038	MBP_cg14298244	Myelin	0.88	4.44e-10	2.07e-08
DDR1_cg12669395	MBP_cg14298244	Myelin	0.87	8.06e-10	3.49e-08
DDR1_cg12847793	MBP_cg14298244	Myelin	0.77	1.28e-06	2.58e-05
DDR1_cg13329862	MBP_cg14298244	Myelin	0.93	1.26e-13	2.2e-11
DDR1_cg13351860	MBP_cg14298244	Myelin	0.94	9.33e-14	1.74e-11
DDR1_cg13695585	MBP_cg14298244	Myelin	0.79	3.96e-07	9.02e-06
DDR1_cg14058861	MBP_cg14298244	Myelin	0.78	7.42e-07	1.59e-05
DDR1_cg14790552	MBP_cg14298244	Myelin	0.84	1.71e-08	5.3e-07
DDR1_cg15656686	MBP_cg14298244	Myelin	0.87	1.02e-09	4.31e-08
DDR1_cg16111190	MBP_cg14298244	Myelin	0.85	5.73e-09	1.99e-07
DDR1_cg16797094	MBP_cg14298244	Myelin	0.91	6.49e-12	5.56e-10
DDR1_cg17176005	MBP_cg14298244	Myelin	0.81	1.17e-07	2.99e-06
DDR1_cg17604312	MBP_cg14298244	Myelin	0.78	4.68e-07	1.05e-05
DDR1_cg19215110	MBP_cg14298244	Myelin	0.81	1.32e-07	3.34e-06
DDR1_cg19591099	MBP_cg14298244	Myelin	0.78	7.42e-07	1.59e-05
DDR1_cg21677258	MBP_cg14298244	Myelin	0.89	1.22e-10	6.76e-09
DDR1_cg24636809	MBP_cg14298244	Myelin	0.87	6e-10	2.7e-08
DDR1_cg24727290	MBP_cg14298244	Myelin	0.87	6.31e-10	2.82e-08
DDR1_cg25613385	MBP_cg14298244	Myelin	0.76	1.49e-06	2.95e-05
DDR1_cg25655106	MBP_cg14298244	Myelin	0.9	2.38e-11	1.66e-09
DDR1_cg27237814	MBP_cg14298244	Myelin	0.89	9.72e-11	5.55e-09
DDR1_cg27593250	MBP_cg14298244	Myelin	0.76	1.72e-06	3.35e-05
DDR1_cg01598675	MBP_cg14918582	Myelin	0.8	1.69e-07	4.19e-06
DDR1_cg07908039	MBP_cg14918582	Myelin	0.84	9.65e-09	3.17e-07
DDR1_cg07979747	MBP_cg14918582	Myelin	0.77	9.65e-07	2e-05
DDR1_cg08673763	MBP_cg14918582	Myelin	0.8	1.91e-07	4.67e-06
DDR1_cg08951271	MBP_cg14918582	Myelin	0.81	9.05e-08	2.38e-06
DDR1_cg09822812	MBP_cg14918582	Myelin	0.79	2.73e-07	6.44e-06
DDR1_cg11530564	MBP_cg14918582	Myelin	0.77	1.34e-06	2.7e-05
DDR1_cg11676038	MBP_cg14918582	Myelin	0.76	1.81e-06	3.5e-05
DDR1_cg12669395	MBP_cg14918582	Myelin	0.79	3.43e-07	7.95e-06
DDR1_cg13329862	MBP_cg14918582	Myelin	0.77	1.18e-06	2.41e-05
DDR1_cg13351860	MBP_cg14918582	Myelin	0.76	1.68e-06	3.28e-05
DDR1_cg13695585	MBP_cg14918582	Myelin	0.78	5.22e-07	1.16e-05
DDR1_cg14790552	MBP_cg14918582	Myelin	0.8	1.41e-07	3.54e-06
DDR1_cg17604312	MBP_cg14918582	Myelin	0.81	1.06e-07	2.74e-06
DDR1_cg19215110	MBP_cg14918582	Myelin	0.75	3.13e-06	5.67e-05
DDR1_cg21677258	MBP_cg14918582	Myelin	0.83	3.07e-08	8.93e-07
DDR1_cg25655106	MBP_cg14918582	Myelin	0.77	1.07e-06	2.2e-05
DDR1_cg27237814	MBP_cg14918582	Myelin	0.77	9.16e-07	1.91e-05
DDR1_cg00466425	MBP_cg14946295	Myelin	0.87	7.68e-10	3.34e-08
DDR1_cg00934322	MBP_cg14946295	Myelin	0.76	1.77e-06	3.43e-05
DDR1_cg01936707	MBP_cg14946295	Myelin	0.91	9.26e-12	7.51e-10
DDR1_cg05703744	MBP_cg14946295	Myelin	0.92	1.41e-12	1.55e-10
DDR1_cg06200824	MBP_cg14946295	Myelin	0.77	8.25e-07	1.74e-05
DDR1_cg06501109	MBP_cg14946295	Myelin	0.8	2.03e-07	4.93e-06
DDR1_cg07908039	MBP_cg14946295	Myelin	0.76	1.68e-06	3.28e-05
DDR1_cg07912416	MBP_cg14946295	Myelin	0.87	1.24e-09	5.08e-08
DDR1_cg07979747	MBP_cg14946295	Myelin	0.86	2.56e-09	9.63e-08
DDR1_cg08673763	MBP_cg14946295	Myelin	0.89	1.15e-10	6.43e-09
DDR1_cg08951271	MBP_cg14946295	Myelin	0.92	1.79e-12	1.9e-10
DDR1_cg09965419	MBP_cg14946295	Myelin	0.75	3.27e-06	5.9e-05
DDR1_cg11530564	MBP_cg14946295	Myelin	0.95	6.22e-15	2.2e-12
DDR1_cg11676038	MBP_cg14946295	Myelin	0.95	6.22e-15	2.2e-12
DDR1_cg12669395	MBP_cg14946295	Myelin	0.93	1.39e-13	2.37e-11
DDR1_cg13329862	MBP_cg14946295	Myelin	0.9	2.54e-11	1.76e-09
DDR1_cg13351860	MBP_cg14946295	Myelin	0.92	1.3e-12	1.46e-10
DDR1_cg13695585	MBP_cg14946295	Myelin	0.75	2.65e-06	4.91e-05
DDR1_cg14058861	MBP_cg14946295	Myelin	0.8	1.69e-07	4.19e-06
DDR1_cg14790552	MBP_cg14946295	Myelin	0.9	3.95e-11	2.57e-09
DDR1_cg15656686	MBP_cg14946295	Myelin	0.87	6e-10	2.7e-08
DDR1_cg16111190	MBP_cg14946295	Myelin	0.89	1.37e-10	7.45e-09
DDR1_cg16797094	MBP_cg14946295	Myelin	0.91	9.26e-12	7.51e-10
DDR1_cg17176005	MBP_cg14946295	Myelin	0.79	3.43e-07	7.95e-06
DDR1_cg17604312	MBP_cg14946295	Myelin	0.81	7.95e-08	2.11e-06
DDR1_cg18577693	MBP_cg14946295	Myelin	0.77	1.25e-06	2.52e-05
DDR1_cg19215110	MBP_cg14946295	Myelin	0.77	1.04e-06	2.15e-05
DDR1_cg19591099	MBP_cg14946295	Myelin	0.82	4.2e-08	1.19e-06
DDR1_cg21677258	MBP_cg14946295	Myelin	0.92	9.29e-13	1.11e-10
DDR1_cg24566261	MBP_cg14946295	Myelin	0.75	2.53e-06	4.71e-05
DDR1_cg24636809	MBP_cg14946295	Myelin	0.9	3.95e-11	2.57e-09
DDR1_cg24727290	MBP_cg14946295	Myelin	0.84	1.13e-08	3.65e-07
DDR1_cg25613385	MBP_cg14946295	Myelin	0.77	8.92e-07	1.87e-05
DDR1_cg25655106	MBP_cg14946295	Myelin	0.92	3.09e-12	2.96e-10
DDR1_cg27237814	MBP_cg14946295	Myelin	0.87	6e-10	2.7e-08
DDR1_cg27593250	MBP_cg14946295	Myelin	0.82	4.35e-08	1.23e-06
DDR1_cg00466425	MBP_cg15224291	Myelin	0.9	2.88e-11	1.96e-09
DDR1_cg01598675	MBP_cg15224291	Myelin	0.76	1.95e-06	3.73e-05
DDR1_cg01936707	MBP_cg15224291	Myelin	0.9	2.38e-11	1.66e-09
DDR1_cg05703744	MBP_cg15224291	Myelin	0.92	1.94e-12	2.03e-10
DDR1_cg06200824	MBP_cg15224291	Myelin	0.79	2.73e-07	6.44e-06
DDR1_cg06501109	MBP_cg15224291	Myelin	0.8	1.45e-07	3.64e-06
DDR1_cg07908039	MBP_cg15224291	Myelin	0.75	2.41e-06	4.52e-05
DDR1_cg07912416	MBP_cg15224291	Myelin	0.86	3.46e-09	1.27e-07
DDR1_cg07979747	MBP_cg15224291	Myelin	0.87	9.31e-10	3.96e-08
DDR1_cg08673763	MBP_cg15224291	Myelin	0.9	4.47e-11	2.86e-09
DDR1_cg08951271	MBP_cg15224291	Myelin	0.92	2.65e-12	2.64e-10
DDR1_cg11530564	MBP_cg15224291	Myelin	0.91	8.05e-12	6.68e-10
DDR1_cg11676038	MBP_cg15224291	Myelin	0.95	3.33e-15	1.4e-12
DDR1_cg12669395	MBP_cg15224291	Myelin	0.93	1.85e-13	2.96e-11
DDR1_cg12847793	MBP_cg15224291	Myelin	0.76	2.04e-06	3.9e-05
DDR1_cg13329862	MBP_cg15224291	Myelin	0.92	1.19e-12	1.36e-10
DDR1_cg13351860	MBP_cg15224291	Myelin	0.9	5.37e-11	3.35e-09
DDR1_cg14058861	MBP_cg15224291	Myelin	0.81	1.13e-07	2.9e-06
DDR1_cg14790552	MBP_cg15224291	Myelin	0.86	2.45e-09	9.27e-08
DDR1_cg15656686	MBP_cg15224291	Myelin	0.83	2.47e-08	7.36e-07
DDR1_cg16111190	MBP_cg15224291	Myelin	0.87	1.13e-09	4.68e-08
DDR1_cg16797094	MBP_cg15224291	Myelin	0.87	5.43e-10	2.47e-08
DDR1_cg17176005	MBP_cg15224291	Myelin	0.78	6.32e-07	1.37e-05
DDR1_cg17604312	MBP_cg15224291	Myelin	0.84	1.71e-08	5.3e-07
DDR1_cg19215110	MBP_cg15224291	Myelin	0.83	2.3e-08	6.9e-07
DDR1_cg19591099	MBP_cg15224291	Myelin	0.84	1e-08	3.29e-07
DDR1_cg21677258	MBP_cg15224291	Myelin	0.89	7.25e-11	4.36e-09
DDR1_cg24636809	MBP_cg15224291	Myelin	0.9	3.71e-11	2.44e-09
DDR1_cg24727290	MBP_cg15224291	Myelin	0.89	8.16e-11	4.81e-09
DDR1_cg25655106	MBP_cg15224291	Myelin	0.92	8.54e-13	1.03e-10
DDR1_cg27237814	MBP_cg15224291	Myelin	0.87	7.68e-10	3.34e-08
DDR1_cg27593250	MBP_cg15224291	Myelin	0.78	4.68e-07	1.05e-05
DDR1_cg00466425	MBP_cg15352683	Myelin	0.86	3.04e-09	1.13e-07
DDR1_cg01936707	MBP_cg15352683	Myelin	0.76	2.14e-06	4.06e-05
DDR1_cg05703744	MBP_cg15352683	Myelin	0.88	3.26e-10	1.59e-08
DDR1_cg06200824	MBP_cg15352683	Myelin	0.75	2.98e-06	5.43e-05
DDR1_cg07908039	MBP_cg15352683	Myelin	0.75	3.35e-06	6.02e-05
DDR1_cg07912416	MBP_cg15352683	Myelin	0.82	3.92e-08	1.12e-06
DDR1_cg07979747	MBP_cg15352683	Myelin	0.83	2.66e-08	7.86e-07
DDR1_cg08673763	MBP_cg15352683	Myelin	0.85	6.48e-09	2.22e-07
DDR1_cg08951271	MBP_cg15352683	Myelin	0.87	6.63e-10	2.93e-08
DDR1_cg11530564	MBP_cg15352683	Myelin	0.85	7.02e-09	2.39e-07
DDR1_cg11676038	MBP_cg15352683	Myelin	0.88	4.22e-10	1.99e-08
DDR1_cg12669395	MBP_cg15352683	Myelin	0.88	4.22e-10	1.99e-08
DDR1_cg12847793	MBP_cg15352683	Myelin	0.8	1.5e-07	3.75e-06
DDR1_cg13329862	MBP_cg15352683	Myelin	0.91	1.22e-11	9.52e-10
DDR1_cg13351860	MBP_cg15352683	Myelin	0.88	4.67e-10	2.17e-08
DDR1_cg14790552	MBP_cg15352683	Myelin	0.81	1.06e-07	2.74e-06
DDR1_cg15656686	MBP_cg15352683	Myelin	0.8	1.59e-07	3.97e-06
DDR1_cg16111190	MBP_cg15352683	Myelin	0.79	2.65e-07	6.28e-06
DDR1_cg16797094	MBP_cg15352683	Myelin	0.82	5.34e-08	1.47e-06
DDR1_cg17176005	MBP_cg15352683	Myelin	0.79	2.65e-07	6.28e-06
DDR1_cg17604312	MBP_cg15352683	Myelin	0.78	7.23e-07	1.55e-05
DDR1_cg19215110	MBP_cg15352683	Myelin	0.81	9.96e-08	2.59e-06
DDR1_cg19591099	MBP_cg15352683	Myelin	0.78	5.22e-07	1.16e-05
DDR1_cg21677258	MBP_cg15352683	Myelin	0.84	1.13e-08	3.65e-07
DDR1_cg24636809	MBP_cg15352683	Myelin	0.89	1.71e-10	9.06e-09
DDR1_cg24727290	MBP_cg15352683	Myelin	0.87	1.42e-09	5.75e-08
DDR1_cg25655106	MBP_cg15352683	Myelin	0.84	1.71e-08	5.3e-07
DDR1_cg27237814	MBP_cg15352683	Myelin	0.85	4.11e-09	1.48e-07
DDR1_cg27593250	MBP_cg15352683	Myelin	0.75	3.13e-06	5.67e-05
DDR1_cg00466425	MBP_cg15391531	Myelin	0.9	5.06e-11	3.18e-09
DDR1_cg01936707	MBP_cg15391531	Myelin	0.87	9.31e-10	3.96e-08
DDR1_cg05703744	MBP_cg15391531	Myelin	0.89	6.06e-11	3.72e-09
DDR1_cg06200824	MBP_cg15391531	Myelin	0.81	9.96e-08	2.59e-06
DDR1_cg06501109	MBP_cg15391531	Myelin	0.82	6.52e-08	1.77e-06
DDR1_cg07908039	MBP_cg15391531	Myelin	0.79	2.97e-07	6.98e-06
DDR1_cg07912416	MBP_cg15391531	Myelin	0.88	3.09e-10	1.52e-08
DDR1_cg07979747	MBP_cg15391531	Myelin	0.9	2.71e-11	1.85e-09
DDR1_cg08673763	MBP_cg15391531	Myelin	0.87	9.31e-10	3.96e-08
DDR1_cg08951271	MBP_cg15391531	Myelin	0.94	1.64e-14	4.5e-12
DDR1_cg09822812	MBP_cg15391531	Myelin	0.78	5.08e-07	1.13e-05
DDR1_cg09965419	MBP_cg15391531	Myelin	0.75	2.53e-06	4.71e-05
DDR1_cg11530564	MBP_cg15391531	Myelin	0.88	3.26e-10	1.59e-08
DDR1_cg11676038	MBP_cg15391531	Myelin	0.91	8.05e-12	6.68e-10
DDR1_cg12669395	MBP_cg15391531	Myelin	0.92	8.54e-13	1.03e-10
DDR1_cg12847793	MBP_cg15391531	Myelin	0.79	3.15e-07	7.35e-06
[truncated: 1,176 more rows]

## Sheet: TS9_Comethylation NeuN+
Table S9. Adjusted significant correlation coefficients ≥ 0.75 for individual CpGs 5-mC levels between DDR1 5-mC levels and selected Myelin genes in NeuN+ nuclei from the FC
DDR1 CpG	Gene CpG	Cell type marker	ρa	p-value	Adj p-valueb
DDR1_cg05703744	CNP_cg01443071	Myelin	0.933637	<2.22E-16	<2.22E-16
DDR1_cg11676038	CNP_cg01443071	Myelin	0.918657	<2.22E-16	<2.22E-16
DDR1_cg07912416	CNP_cg01443071	Myelin	0.888522	<2.22E-16	<2.22E-16
DDR1_cg12316667	CNP_cg01443071	Myelin	0.882675	<2.22E-16	<2.22E-16
DDR1_cg06200824	CNP_cg01443071	Myelin	0.875297	<2.22E-16	<2.22E-16
DDR1_cg13218242	CNP_cg01443071	Myelin	0.872596	<2.22E-16	<2.22E-16
DDR1_cg21677258	CNP_cg01443071	Myelin	0.866548	<2.22E-16	<2.22E-16
DDR1_cg19591099	CNP_cg01443071	Myelin	0.86296	<2.22E-16	<2.22E-16
DDR1_cg12669395	CNP_cg01443071	Myelin	0.860518	<2.22E-16	<2.22E-16
DDR1_cg17604312	CNP_cg01443071	Myelin	0.815788	1.00364e-13	1.70518e-11
DDR1_cg06501109	CNP_cg01443071	Myelin	0.811676	1.67422e-13	2.69709e-11
DDR1_cg07979747	CNP_cg01443071	Myelin	0.787904	2.54685e-12	3.04946e-10
DDR1_cg25655106	CNP_cg01443071	Myelin	0.780389	5.60907e-12	6.13482e-10
DDR1_cg08673763	CNP_cg01443071	Myelin	0.760311	4.00671e-11	3.54857e-09
DDR1_cg01598675	CNP_cg01443071	Myelin	0.74623	1.42449e-10	1.0773e-08
DDR1_cg05703744	CNP_cg02357631	Myelin	0.939365	<2.22E-16	<2.22E-16
DDR1_cg11676038	CNP_cg02357631	Myelin	0.909751	<2.22E-16	<2.22E-16
DDR1_cg12669395	CNP_cg02357631	Myelin	0.891931	<2.22E-16	<2.22E-16
DDR1_cg07912416	CNP_cg02357631	Myelin	0.883325	<2.22E-16	<2.22E-16
DDR1_cg12316667	CNP_cg02357631	Myelin	0.867844	<2.22E-16	<2.22E-16
DDR1_cg19591099	CNP_cg02357631	Myelin	0.867763	<2.22E-16	<2.22E-16
DDR1_cg06200824	CNP_cg02357631	Myelin	0.860748	<2.22E-16	<2.22E-16
DDR1_cg21677258	CNP_cg02357631	Myelin	0.856878	2.22045e-16	7.29752e-14
DDR1_cg13218242	CNP_cg02357631	Myelin	0.854298	4.44089e-16	1.3302e-13
DDR1_cg17604312	CNP_cg02357631	Myelin	0.827528	2.17604e-14	4.3214e-12
DDR1_cg06501109	CNP_cg02357631	Myelin	0.826157	2.62013e-14	5.1429e-12
DDR1_cg25655106	CNP_cg02357631	Myelin	0.812127	1.58318e-13	2.56572e-11
DDR1_cg07979747	CNP_cg02357631	Myelin	0.805854	3.37508e-13	5.0436e-11
DDR1_cg08673763	CNP_cg02357631	Myelin	0.792453	1.55498e-12	1.96263e-10
DDR1_cg16111190	CNP_cg02357631	Myelin	0.754878	6.60232e-11	5.46951e-09
DDR1_cg27237814	CNP_cg02357631	Myelin	0.751008	9.35048e-11	7.43202e-09
DDR1_cg21677258	CNP_cg04242650	Myelin	0.787937	2.53797e-12	3.04017e-10
DDR1_cg05703744	CNP_cg04242650	Myelin	0.775439	9.27902e-12	9.6791e-10
DDR1_cg06200824	CNP_cg04242650	Myelin	0.75899	4.5294e-11	3.94434e-09
DDR1_cg05703744	CNP_cg09479341	Myelin	0.901629	<2.22E-16	<2.22E-16
DDR1_cg11676038	CNP_cg09479341	Myelin	0.878707	<2.22E-16	<2.22E-16
DDR1_cg21677258	CNP_cg09479341	Myelin	0.868892	<2.22E-16	<2.22E-16
DDR1_cg07912416	CNP_cg09479341	Myelin	0.857039	2.22045e-16	7.29752e-14
DDR1_cg06200824	CNP_cg09479341	Myelin	0.850831	8.88178e-16	2.49724e-13
DDR1_cg12669395	CNP_cg09479341	Myelin	0.840365	3.55271e-15	8.5798e-13
DDR1_cg19591099	CNP_cg09479341	Myelin	0.820674	5.39568e-14	9.7948e-12
DDR1_cg12316667	CNP_cg09479341	Myelin	0.819787	6.03961e-14	1.07899e-11
DDR1_cg13218242	CNP_cg09479341	Myelin	0.811805	1.64757e-13	2.65733e-11
DDR1_cg08673763	CNP_cg09479341	Myelin	0.768747	1.79656e-11	1.74734e-09
DDR1_cg25655106	CNP_cg09479341	Myelin	0.761248	3.67115e-11	3.28908e-09
DDR1_cg17604312	CNP_cg09479341	Myelin	0.754959	6.55418e-11	5.43963e-09
DDR1_cg07979747	CNP_cg09479341	Myelin	0.751305	9.10583e-11	7.2589e-09
DDR1_cg05703744	CNP_cg14376548	Myelin	0.912613	<2.22E-16	<2.22E-16
DDR1_cg21677258	CNP_cg14376548	Myelin	0.900679	<2.22E-16	<2.22E-16
DDR1_cg11676038	CNP_cg14376548	Myelin	0.899488	<2.22E-16	<2.22E-16
DDR1_cg07912416	CNP_cg14376548	Myelin	0.873385	<2.22E-16	<2.22E-16
DDR1_cg06200824	CNP_cg14376548	Myelin	0.848469	8.88178e-16	2.49724e-13
DDR1_cg12316667	CNP_cg14376548	Myelin	0.848308	1.11022e-15	3.05797e-13
DDR1_cg19591099	CNP_cg14376548	Myelin	0.847461	1.33227e-15	3.54677e-13
DDR1_cg13218242	CNP_cg14376548	Myelin	0.846534	1.33227e-15	3.54677e-13
DDR1_cg12669395	CNP_cg14376548	Myelin	0.844575	1.77636e-15	4.5759e-13
DDR1_cg06501109	CNP_cg14376548	Myelin	0.808878	2.35145e-13	3.64273e-11
DDR1_cg17604312	CNP_cg14376548	Myelin	0.806096	3.27738e-13	4.91389e-11
DDR1_cg08673763	CNP_cg14376548	Myelin	0.765537	2.44733e-11	2.30968e-09
DDR1_cg01598675	CNP_cg14376548	Myelin	0.761455	3.60059e-11	3.23121e-09
DDR1_cg25655106	CNP_cg14376548	Myelin	0.756063	5.92775e-11	4.99638e-09
DDR1_cg05703744	CNP_cg14826331	Myelin	0.910901	<2.22E-16	<2.22E-16
DDR1_cg11676038	CNP_cg14826331	Myelin	0.885036	<2.22E-16	<2.22E-16
DDR1_cg12316667	CNP_cg14826331	Myelin	0.873891	<2.22E-16	<2.22E-16
DDR1_cg07912416	CNP_cg14826331	Myelin	0.856475	4.44089e-16	1.3302e-13
DDR1_cg17604312	CNP_cg14826331	Myelin	0.848008	1.11022e-15	3.05797e-13
DDR1_cg12669395	CNP_cg14826331	Myelin	0.841776	2.88658e-15	7.15639e-13
DDR1_cg06200824	CNP_cg14826331	Myelin	0.835672	7.10543e-15	1.61096e-12
DDR1_cg13218242	CNP_cg14826331	Myelin	0.835107	7.54952e-15	1.6946e-12
DDR1_cg19591099	CNP_cg14826331	Myelin	0.831882	1.19904e-14	2.54766e-12
DDR1_cg21677258	CNP_cg14826331	Myelin	0.828173	1.9984e-14	4.02178e-12
DDR1_cg06501109	CNP_cg14826331	Myelin	0.792533	1.54121e-12	1.94798e-10
DDR1_cg25655106	CNP_cg14826331	Myelin	0.757378	5.25535e-11	4.50259e-09
DDR1_cg07979747	CNP_cg14826331	Myelin	0.751184	9.20459e-11	7.33115e-09
DDR1_cg21677258	CNP_cg16563470	Myelin	0.817989	7.59393e-14	1.32773e-11
DDR1_cg05703744	CNP_cg16563470	Myelin	0.79517	1.15108e-12	1.50553e-10
DDR1_cg07912416	CNP_cg16563470	Myelin	0.761626	3.54339e-11	3.1894e-09
DDR1_cg11676038	CNP_cg16563470	Myelin	0.754385	6.90448e-11	5.68154e-09
DDR1_cg05703744	CNP_cg27435103	Myelin	0.913159	<2.22E-16	<2.22E-16
DDR1_cg11676038	CNP_cg27435103	Myelin	0.87532	<2.22E-16	<2.22E-16
DDR1_cg21677258	CNP_cg27435103	Myelin	0.866796	<2.22E-16	<2.22E-16
DDR1_cg13218242	CNP_cg27435103	Myelin	0.86091	<2.22E-16	<2.22E-16
DDR1_cg07912416	CNP_cg27435103	Myelin	0.847202	1.33227e-15	3.54677e-13
DDR1_cg12316667	CNP_cg27435103	Myelin	0.842203	2.66454e-15	6.66085e-13
DDR1_cg06200824	CNP_cg27435103	Myelin	0.840026	3.77476e-15	9.07553e-13
DDR1_cg19591099	CNP_cg27435103	Myelin	0.8393	4.21885e-15	1.00274e-12
DDR1_cg12669395	CNP_cg27435103	Myelin	0.811176	1.7808e-13	2.84339e-11
DDR1_cg17604312	CNP_cg27435103	Myelin	0.810434	1.94733e-13	3.08742e-11
DDR1_cg06501109	CNP_cg27435103	Myelin	0.763748	2.90146e-11	2.6812e-09
DDR1_cg19591099	CNP_g23687677	Myelin	0.765683	2.41347e-11	2.28011e-09
DDR1_cg06200824	CSPG4_cg02400942	Myelin	0.821642	4.75175e-14	8.73728e-12
DDR1_cg11676038	CSPG4_cg02400942	Myelin	0.809442	2.19602e-13	3.42747e-11
DDR1_cg05703744	CSPG4_cg02400942	Myelin	0.799548	7.02549e-13	9.70508e-11
DDR1_cg19591099	CSPG4_cg02400942	Myelin	0.793662	1.36091e-12	1.7462e-10
DDR1_cg07912416	CSPG4_cg02400942	Myelin	0.773101	1.17182e-11	1.1862e-09
DDR1_cg15720085	CSPG4_cg02400942	Myelin	0.754556	6.79825e-11	5.61291e-09
DDR1_cg12669395	CSPG4_cg02400942	Myelin	0.752595	8.11289e-11	6.56998e-09
DDR1_cg13218242	CSPG4_cg03238581	Myelin	0.759152	4.46225e-11	3.89339e-09
DDR1_cg05703744	CSPG4_cg16682872	Myelin	0.849702	8.88178e-16	2.49724e-13
DDR1_cg19591099	CSPG4_cg16682872	Myelin	0.824141	3.41949e-14	6.5503e-12
DDR1_cg11676038	CSPG4_cg16682872	Myelin	0.820368	5.59552e-14	1.01033e-11
DDR1_cg07912416	CSPG4_cg16682872	Myelin	0.789066	2.24798e-12	2.72416e-10
DDR1_cg06200824	CSPG4_cg16682872	Myelin	0.778342	6.91802e-12	7.40185e-10
DDR1_cg12316667	CSPG4_cg16682872	Myelin	0.764957	2.58655e-11	2.41912e-09
DDR1_cg12669395	CSPG4_cg16682872	Myelin	0.758804	4.60811e-11	4.00258e-09
DDR1_cg06501109	CSPG4_cg16682872	Myelin	0.746089	1.44207e-10	1.08831e-08
DDR1_cg21677258	CSPG4_cg16682872	Myelin	0.745364	1.53598e-10	1.14988e-08
DDR1_cg06200824	CSPG4_cg21815847	Myelin	0.752459	8.21259e-11	6.62889e-09
DDR1_cg24727290	MAG_cg00162517	Myelin	0.828012	2.04281e-14	4.09288e-12
DDR1_cg02695062	MAG_cg00162517	Myelin	0.81245	1.52323e-13	2.48493e-11
DDR1_cg08951271	MAG_cg00162517	Myelin	0.798662	7.77156e-13	1.06325e-10
DDR1_cg25655106	MAG_cg00162517	Myelin	0.787212	2.74269e-12	3.26229e-10
DDR1_cg13329862	MAG_cg00162517	Myelin	0.774069	1.0643e-11	1.09167e-09
DDR1_cg08673763	MAG_cg00162517	Myelin	0.762861	3.15514e-11	2.88312e-09
DDR1_cg18093866	MAG_cg00162517	Myelin	0.757942	4.98956e-11	4.29939e-09
DDR1_cg07803420	MAG_cg00162517	Myelin	0.75512	6.45892e-11	5.37707e-09
DDR1_cg16111190	MAG_cg00162517	Myelin	0.750605	9.69211e-11	7.67425e-09
DDR1_cg05703744	MAG_cg01349478	Myelin	0.882358	<2.22E-16	<2.22E-16
DDR1_cg11676038	MAG_cg01349478	Myelin	0.876852	<2.22E-16	<2.22E-16
DDR1_cg07912416	MAG_cg01349478	Myelin	0.855588	4.44089e-16	1.3302e-13
DDR1_cg19591099	MAG_cg01349478	Myelin	0.852201	4.44089e-16	1.3302e-13
DDR1_cg12669395	MAG_cg01349478	Myelin	0.846735	1.33227e-15	3.54677e-13
DDR1_cg06200824	MAG_cg01349478	Myelin	0.846073	1.55431e-15	4.10958e-13
DDR1_cg12316667	MAG_cg01349478	Myelin	0.844702	1.77636e-15	4.5759e-13
DDR1_cg21677258	MAG_cg01349478	Myelin	0.834301	8.43769e-15	1.86304e-12
DDR1_cg13218242	MAG_cg01349478	Myelin	0.818578	7.06102e-14	1.24098e-11
DDR1_cg25655106	MAG_cg01349478	Myelin	0.806563	3.10196e-13	4.6664e-11
DDR1_cg08673763	MAG_cg01349478	Myelin	0.80358	4.40981e-13	6.3716e-11
DDR1_cg06501109	MAG_cg01349478	Myelin	0.792372	1.56875e-12	1.97815e-10
DDR1_cg16111190	MAG_cg01349478	Myelin	0.789873	2.06035e-12	2.51709e-10
DDR1_cg17604312	MAG_cg01349478	Myelin	0.786567	2.93809e-12	3.46273e-10
DDR1_cg06200824	MAG_cg05055150	Myelin	0.927431	<2.22E-16	<2.22E-16
DDR1_cg05703744	MAG_cg05055150	Myelin	0.896791	<2.22E-16	<2.22E-16
DDR1_cg19591099	MAG_cg05055150	Myelin	0.889615	<2.22E-16	<2.22E-16
DDR1_cg11676038	MAG_cg05055150	Myelin	0.884875	<2.22E-16	<2.22E-16
DDR1_cg12669395	MAG_cg05055150	Myelin	0.875804	<2.22E-16	<2.22E-16
DDR1_cg07912416	MAG_cg05055150	Myelin	0.87244	<2.22E-16	<2.22E-16
DDR1_cg12316667	MAG_cg05055150	Myelin	0.853169	4.44089e-16	1.3302e-13
DDR1_cg25655106	MAG_cg05055150	Myelin	0.82785	2.08722e-14	4.16951e-12
DDR1_cg21677258	MAG_cg05055150	Myelin	0.823577	3.68594e-14	6.9865e-12
DDR1_cg06501109	MAG_cg05055150	Myelin	0.786889	2.83884e-12	3.35892e-10
DDR1_cg15720085	MAG_cg05055150	Myelin	0.783422	4.09406e-12	4.63719e-10
DDR1_cg13218242	MAG_cg05055150	Myelin	0.779874	5.91438e-12	6.43233e-10
DDR1_cg17604312	MAG_cg05055150	Myelin	0.777778	7.32703e-12	7.79628e-10
DDR1_cg16111190	MAG_cg05055150	Myelin	0.77165	1.35261e-11	1.34802e-09
DDR1_cg01598675	MAG_cg05055150	Myelin	0.74749	1.27596e-10	9.76297e-09
DDR1_cg07803420	MAG_cg05663558	Myelin	0.854799	4.44089e-16	1.3302e-13
DDR1_cg08951271	MAG_cg05663558	Myelin	0.824198	3.39728e-14	6.51238e-12
DDR1_cg24727290	MAG_cg05663558	Myelin	0.809241	2.25153e-13	3.504e-11
DDR1_cg02695062	MAG_cg05663558	Myelin	0.795976	1.05205e-12	1.3908e-10
DDR1_cg25655106	MAG_cg05663558	Myelin	0.789002	2.26352e-12	2.74177e-10
DDR1_cg16111190	MAG_cg05663558	Myelin	0.784083	3.82006e-12	4.36892e-10
DDR1_cg13329862	MAG_cg05663558	Myelin	0.780858	5.34461e-12	5.87886e-10
DDR1_cg08673763	MAG_cg05663558	Myelin	0.771585	1.36131e-11	1.3557e-09
DDR1_cg05703744	MAG_cg08585489	Myelin	0.934849	<2.22E-16	<2.22E-16
DDR1_cg11676038	MAG_cg08585489	Myelin	0.928901	<2.22E-16	<2.22E-16
DDR1_cg19591099	MAG_cg08585489	Myelin	0.916546	<2.22E-16	<2.22E-16
DDR1_cg06200824	MAG_cg08585489	Myelin	0.897033	<2.22E-16	<2.22E-16
DDR1_cg12669395	MAG_cg08585489	Myelin	0.887254	<2.22E-16	<2.22E-16
DDR1_cg12316667	MAG_cg08585489	Myelin	0.884454	<2.22E-16	<2.22E-16
DDR1_cg21677258	MAG_cg08585489	Myelin	0.870021	<2.22E-16	<2.22E-16
DDR1_cg07912416	MAG_cg08585489	Myelin	0.857604	2.22045e-16	7.29752e-14
DDR1_cg25655106	MAG_cg08585489	Myelin	0.837768	5.32907e-15	1.23832e-12
DDR1_cg17604312	MAG_cg08585489	Myelin	0.796968	9.41025e-13	1.26004e-10
DDR1_cg06501109	MAG_cg08585489	Myelin	0.791808	1.66889e-12	2.08788e-10
DDR1_cg13218242	MAG_cg08585489	Myelin	0.791082	1.80655e-12	2.24557e-10
DDR1_cg08673763	MAG_cg08585489	Myelin	0.771408	1.3852e-11	1.37594e-09
DDR1_cg15720085	MAG_cg08585489	Myelin	0.764796	2.62659e-11	2.45148e-09
DDR1_cg16111190	MAG_cg08585489	Myelin	0.745606	1.50405e-10	1.12911e-08
DDR1_cg05703744	MAG_cg10618943	Myelin	0.799323	7.20757e-13	9.9363e-11
DDR1_cg11676038	MAG_cg10618943	Myelin	0.788251	2.45381e-12	2.9485e-10
DDR1_cg12316667	MAG_cg10618943	Myelin	0.784123	3.80407e-12	4.35431e-10
DDR1_cg07912416	MAG_cg10618943	Myelin	0.774931	9.76441e-12	1.01463e-09
DDR1_cg06200824	MAG_cg10618943	Myelin	0.751991	8.56484e-11	6.88036e-09
DDR1_cg05703744	MAG_cg11902728	Myelin	0.92598	<2.22E-16	<2.22E-16
DDR1_cg11676038	MAG_cg11902728	Myelin	0.914347	<2.22E-16	<2.22E-16
DDR1_cg19591099	MAG_cg11902728	Myelin	0.884293	<2.22E-16	<2.22E-16
DDR1_cg07912416	MAG_cg11902728	Myelin	0.875907	<2.22E-16	<2.22E-16
DDR1_cg12669395	MAG_cg11902728	Myelin	0.87278	<2.22E-16	<2.22E-16
DDR1_cg12316667	MAG_cg11902728	Myelin	0.87123	<2.22E-16	<2.22E-16
DDR1_cg06200824	MAG_cg11902728	Myelin	0.859539	2.22045e-16	7.29752e-14
DDR1_cg13218242	MAG_cg11902728	Myelin	0.858652	2.22045e-16	7.29752e-14
DDR1_cg21677258	MAG_cg11902728	Myelin	0.849057	8.88178e-16	2.49724e-13
DDR1_cg17604312	MAG_cg11902728	Myelin	0.837687	5.32907e-15	1.23832e-12
DDR1_cg25655106	MAG_cg11902728	Myelin	0.815191	1.08358e-13	1.82608e-11
DDR1_cg06501109	MAG_cg11902728	Myelin	0.806725	3.04201e-13	4.58897e-11
DDR1_cg07979747	MAG_cg11902728	Myelin	0.777431	7.58993e-12	8.06333e-10
DDR1_cg01598675	MAG_cg11902728	Myelin	0.758537	4.72318e-11	4.09201e-09
DDR1_cg05703744	MAG_cg12402033	Myelin	0.916788	<2.22E-16	<2.22E-16
DDR1_cg11676038	MAG_cg12402033	Myelin	0.911726	<2.22E-16	<2.22E-16
DDR1_cg21677258	MAG_cg12402033	Myelin	0.901226	<2.22E-16	<2.22E-16
DDR1_cg19591099	MAG_cg12402033	Myelin	0.879697	<2.22E-16	<2.22E-16
DDR1_cg06200824	MAG_cg12402033	Myelin	0.87631	<2.22E-16	<2.22E-16
DDR1_cg12316667	MAG_cg12402033	Myelin	0.873569	<2.22E-16	<2.22E-16
DDR1_cg12669395	MAG_cg12402033	Myelin	0.872417	<2.22E-16	<2.22E-16
DDR1_cg07912416	MAG_cg12402033	Myelin	0.857362	2.22045e-16	7.29752e-14
DDR1_cg13218242	MAG_cg12402033	Myelin	0.846234	1.33227e-15	3.54677e-13
DDR1_cg06501109	MAG_cg12402033	Myelin	0.794065	1.30163e-12	1.67969e-10
DDR1_cg25655106	MAG_cg12402033	Myelin	0.786405	2.98872e-12	3.51474e-10
DDR1_cg17604312	MAG_cg12402033	Myelin	0.783422	4.09406e-12	4.63719e-10
DDR1_cg08673763	MAG_cg12402033	Myelin	0.777133	7.82263e-12	8.29426e-10
DDR1_cg01598675	MAG_cg12402033	Myelin	0.763456	2.98268e-11	2.74687e-09
DDR1_cg15720085	MAG_cg12402033	Myelin	0.753266	7.63847e-11	6.23244e-09
DDR1_cg25655106	MAG_cg14535518	Myelin	0.881148	<2.22E-16	<2.22E-16
DDR1_cg12669395	MAG_cg14535518	Myelin	0.861249	<2.22E-16	<2.22E-16
DDR1_cg08951271	MAG_cg14535518	Myelin	0.857039	2.22045e-16	7.29752e-14
DDR1_cg16111190	MAG_cg14535518	Myelin	0.818578	7.06102e-14	1.24098e-11
DDR1_cg24727290	MAG_cg14535518	Myelin	0.812692	1.47882e-13	2.41832e-11
DDR1_cg12316667	MAG_cg14535518	Myelin	0.803983	4.20552e-13	6.10908e-11
DDR1_cg13329862	MAG_cg14535518	Myelin	0.802209	5.17142e-13	7.37745e-11
DDR1_cg11676038	MAG_cg14535518	Myelin	0.792711	1.51146e-12	1.92024e-10
DDR1_cg27237814	MAG_cg14535518	Myelin	0.790598	1.90425e-12	2.34974e-10
DDR1_cg07803420	MAG_cg14535518	Myelin	0.789147	2.22844e-12	2.70533e-10
DDR1_cg19591099	MAG_cg14535518	Myelin	0.788421	2.40963e-12	2.89798e-10
DDR1_cg08673763	MAG_cg14535518	Myelin	0.781003	5.26512e-12	5.79849e-10
DDR1_cg05703744	MAG_cg14535518	Myelin	0.772053	1.29989e-11	1.30365e-09
DDR1_cg02695062	MAG_cg14535518	Myelin	0.766892	2.14917e-11	2.0483e-09
DDR1_cg17604312	MAG_cg14535518	Myelin	0.751975	8.57645e-11	6.88151e-09
DDR1_cg06200824	MAG_cg14535518	Myelin	0.750443	9.83207e-11	7.76461e-09
DDR1_cg18093866	MAG_cg14535518	Myelin	0.748105	1.20892e-10	9.32119e-09
DDR1_cg06501109	MAG_cg14535518	Myelin	0.74617	1.43198e-10	1.08191e-08
DDR1_cg11676038	MAG_cg15005368	Myelin	0.87304	<2.22E-16	<2.22E-16
DDR1_cg05703744	MAG_cg15005368	Myelin	0.871409	<2.22E-16	<2.22E-16
DDR1_cg13218242	MAG_cg15005368	Myelin	0.863467	<2.22E-16	<2.22E-16
DDR1_cg07912416	MAG_cg15005368	Myelin	0.852501	4.44089e-16	1.3302e-13
DDR1_cg12669395	MAG_cg15005368	Myelin	0.836451	6.21725e-15	1.42754e-12
DDR1_cg12316667	MAG_cg15005368	Myelin	0.832423	1.11022e-14	2.37198e-12
DDR1_cg19591099	MAG_cg15005368	Myelin	0.828996	1.77636e-14	3.63166e-12
DDR1_cg21677258	MAG_cg15005368	Myelin	0.804201	4.09894e-13	5.97029e-11
DDR1_cg06200824	MAG_cg15005368	Myelin	0.79392	1.3225e-12	1.70419e-10
DDR1_cg01598675	MAG_cg15005368	Myelin	0.77091	1.45461e-11	1.43645e-09
DDR1_cg25655106	MAG_cg15005368	Myelin	0.763521	2.96434e-11	2.73184e-09
DDR1_cg17604312	MAG_cg15005368	Myelin	0.76336	3.0099e-11	2.76817e-09
DDR1_cg07979747	MAG_cg15005368	Myelin	0.763254	3.04006e-11	2.79021e-09
DDR1_cg25655106	MAG_cg15761414	Myelin	0.794388	1.25588e-12	1.62765e-10
DDR1_cg12316667	MAG_cg15761414	Myelin	0.766005	2.34013e-11	2.21546e-09
DDR1_cg12669395	MAG_cg17096126	Myelin	0.917088	<2.22E-16	<2.22E-16
DDR1_cg19591099	MAG_cg17096126	Myelin	0.907192	<2.22E-16	<2.22E-16
DDR1_cg11676038	MAG_cg17096126	Myelin	0.900921	<2.22E-16	<2.22E-16
DDR1_cg12316667	MAG_cg17096126	Myelin	0.892598	<2.22E-16	<2.22E-16
DDR1_cg25655106	MAG_cg17096126	Myelin	0.885341	<2.22E-16	<2.22E-16
DDR1_cg05703744	MAG_cg17096126	Myelin	0.880664	<2.22E-16	<2.22E-16
DDR1_cg06200824	MAG_cg17096126	Myelin	0.828576	1.88738e-14	3.82969e-12
DDR1_cg13218242	MAG_cg17096126	Myelin	0.827286	2.26485e-14	4.48461e-12
DDR1_cg07912416	MAG_cg17096126	Myelin	0.822448	4.28546e-14	7.9885e-12
DDR1_cg06501109	MAG_cg17096126	Myelin	0.822287	4.37428e-14	8.13724e-12
DDR1_cg17604312	MAG_cg17096126	Myelin	0.817126	8.4821e-14	1.46691e-11
DDR1_cg16111190	MAG_cg17096126	Myelin	0.792292	1.58273e-12	1.99301e-10
DDR1_cg21677258	MAG_cg17096126	Myelin	0.791324	1.75948e-12	2.1921e-10
DDR1_cg08673763	MAG_cg17096126	Myelin	0.782374	4.56746e-12	5.11132e-10
DDR1_cg27237814	MAG_cg17096126	Myelin	0.781809	4.84324e-12	5.39316e-10
DDR1_cg08951271	MAG_cg17096126	Myelin	0.780922	5.30909e-12	5.84216e-10
DDR1_cg24727290	MAG_cg17096126	Myelin	0.755685	6.13565e-11	5.15234e-09
DDR1_cg01598675	MAG_cg17096126	Myelin	0.748901	1.12706e-10	8.77003e-09
DDR1_cg16111190	MAG_cg21305926	Myelin	0.751653	8.82745e-11	7.05987e-09
DDR1_cg11676038	MAG_cg22266001	Myelin	0.877049	<2.22E-16	<2.22E-16
DDR1_cg05703744	MAG_cg22266001	Myelin	0.873564	<2.22E-16	<2.22E-16
DDR1_cg06200824	MAG_cg22266001	Myelin	0.84135	3.10862e-15	7.60924e-13
DDR1_cg17604312	MAG_cg22266001	Myelin	0.826231	2.59792e-14	5.10673e-12
DDR1_cg12316667	MAG_cg22266001	Myelin	0.82365	3.64153e-14	6.92172e-12
DDR1_cg21677258	MAG_cg22266001	Myelin	0.819498	6.26166e-14	1.11425e-11
DDR1_cg07912416	MAG_cg22266001	Myelin	0.816514	9.17044e-14	1.57387e-11
DDR1_cg19591099	MAG_cg22266001	Myelin	0.807564	2.75335e-13	4.19564e-11
DDR1_cg12669395	MAG_cg22266001	Myelin	0.790888	1.84519e-12	2.28834e-10
DDR1_cg13218242	MAG_cg22266001	Myelin	0.785429	3.31468e-12	3.84953e-10
DDR1_cg06501109	MAG_cg22266001	Myelin	0.762126	3.38125e-11	3.06386e-09
DDR1_cg05703744	MAG_cg27017562	Myelin	0.934425	<2.22E-16	<2.22E-16
DDR1_cg11676038	MAG_cg27017562	Myelin	0.923215	<2.22E-16	<2.22E-16
DDR1_cg19591099	MAG_cg27017562	Myelin	0.907412	<2.22E-16	<2.22E-16
DDR1_cg06200824	MAG_cg27017562	Myelin	0.883948	<2.22E-16	<2.22E-16
DDR1_cg12669395	MAG_cg27017562	Myelin	0.880821	<2.22E-16	<2.22E-16
DDR1_cg12316667	MAG_cg27017562	Myelin	0.872337	<2.22E-16	<2.22E-16
DDR1_cg25655106	MAG_cg27017562	Myelin	0.846897	1.33227e-15	3.54677e-13
DDR1_cg07912416	MAG_cg27017562	Myelin	0.844276	1.9984e-15	5.10896e-13
DDR1_cg21677258	MAG_cg27017562	Myelin	0.840285	3.55271e-15	8.5798e-13
DDR1_cg06501109	MAG_cg27017562	Myelin	0.800492	6.30607e-13	8.8057e-11
DDR1_cg13218242	MAG_cg27017562	Myelin	0.795412	1.12044e-12	1.46758e-10
DDR1_cg17604312	MAG_cg27017562	Myelin	0.785655	3.23652e-12	3.76522e-10
DDR1_cg15720085	MAG_cg27017562	Myelin	0.78247	4.52172e-12	5.07483e-10
DDR1_cg08673763	MAG_cg27017562	Myelin	0.769891	1.60716e-11	1.57673e-09
DDR1_cg16111190	MAG_cg27017562	Myelin	0.759731	4.22866e-11	3.72684e-09
DDR1_cg05703744	MBP_cg00735329	Myelin	0.827044	2.33147e-14	4.60976e-12
DDR1_cg12316667	MBP_cg00735329	Myelin	0.805596	3.47722e-13	5.17337e-11
DDR1_cg21677258	MBP_cg00735329	Myelin	0.797855	8.51541e-13	1.15567e-10
DDR1_cg19591099	MBP_cg00735329	Myelin	0.797694	8.67306e-13	1.1753e-10
DDR1_cg12669395	MBP_cg00735329	Myelin	0.796017	1.04716e-12	1.3857e-10
DDR1_cg11676038	MBP_cg00735329	Myelin	0.79005	2.02105e-12	2.48141e-10
DDR1_cg25655106	MBP_cg00735329	Myelin	0.788744	2.32747e-12	2.81168e-10
DDR1_cg07912416	MBP_cg00735329	Myelin	0.759636	4.2665e-11	3.75163e-09
DDR1_cg13218242	MBP_cg00735329	Myelin	0.753427	7.52831e-11	6.15184e-09
DDR1_cg07979747	MBP_cg00735329	Myelin	0.745621	1.50209e-10	1.12826e-08
DDR1_cg05703744	MBP_cg01475204	Myelin	0.862522	<2.22E-16	<2.22E-16
DDR1_cg21677258	MBP_cg01475204	Myelin	0.837446	5.32907e-15	1.23832e-12
DDR1_cg11676038	MBP_cg01475204	Myelin	0.809886	2.08278e-13	3.27529e-11
DDR1_cg13218242	MBP_cg01475204	Myelin	0.788099	2.49445e-12	2.99069e-10
DDR1_cg07912416	MBP_cg01475204	Myelin	0.782616	4.45377e-12	5.00272e-10
DDR1_cg06200824	MBP_cg01475204	Myelin	0.774875	9.81926e-12	1.01876e-09
DDR1_cg12316667	MBP_cg01475204	Myelin	0.772134	1.28959e-11	1.29428e-09
DDR1_cg07979747	MBP_cg01475204	Myelin	0.770536	1.50893e-11	1.48737e-09
DDR1_cg12669395	MBP_cg01475204	Myelin	0.760215	4.04266e-11	3.57456e-09
DDR1_cg11676038	MBP_cg02782187	Myelin	0.88165	<2.22E-16	<2.22E-16
DDR1_cg05703744	MBP_cg02782187	Myelin	0.85841	2.22045e-16	7.29752e-14
DDR1_cg19591099	MBP_cg02782187	Myelin	0.848734	8.88178e-16	2.49724e-13
DDR1_cg12316667	MBP_cg02782187	Myelin	0.835027	7.77156e-15	1.73867e-12
DDR1_cg07912416	MBP_cg02782187	Myelin	0.828576	1.88738e-14	3.82969e-12
DDR1_cg06200824	MBP_cg02782187	Myelin	0.826318	2.57572e-14	5.06676e-12
DDR1_cg21677258	MBP_cg02782187	Myelin	0.817852	7.72715e-14	1.34841e-11
DDR1_cg12669395	MBP_cg02782187	Myelin	0.804322	4.04121e-13	5.89572e-11
DDR1_cg17604312	MBP_cg02782187	Myelin	0.803903	4.24549e-13	6.16383e-11
DDR1_cg13218242	MBP_cg02782187	Myelin	0.776971	7.95142e-12	8.40774e-10
DDR1_cg25655106	MBP_cg02782187	Myelin	0.765925	2.35825e-11	2.23106e-09
DDR1_cg06501109	MBP_cg02782187	Myelin	0.76536	2.48899e-11	2.34245e-09
DDR1_cg05703744	MBP_cg06410824	Myelin	0.750443	9.83207e-11	7.76461e-09
DDR1_cg07912416	MBP_cg06543730	Myelin	0.802145	5.20917e-13	7.41956e-11
DDR1_cg05703744	MBP_cg06543730	Myelin	0.761505	3.5838e-11	3.21828e-09
DDR1_cg11676038	MBP_cg06548292	Myelin	0.826416	2.53131e-14	4.98303e-12
DDR1_cg12316667	MBP_cg06548292	Myelin	0.822045	4.50751e-14	8.36207e-12
DDR1_cg19591099	MBP_cg06548292	Myelin	0.77173	1.3419e-11	1.34081e-09
DDR1_cg12669395	MBP_cg06548292	Myelin	0.770657	1.49114e-11	1.47091e-09
DDR1_cg06200824	MBP_cg06548292	Myelin	0.75512	6.45892e-11	5.37707e-09
DDR1_cg12669395	MBP_cg06773488	Myelin	0.79767	8.69527e-13	1.17771e-10
DDR1_cg05703744	MBP_cg06773488	Myelin	0.760845	3.81213e-11	3.39738e-09
DDR1_cg16111190	MBP_cg06773488	Myelin	0.74867	1.15033e-10	8.93311e-09
DDR1_cg12316667	MBP_cg08176598	Myelin	0.899694	<2.22E-16	<2.22E-16
DDR1_cg11676038	MBP_cg08176598	Myelin	0.883585	<2.22E-16	<2.22E-16
DDR1_cg12669395	MBP_cg08176598	Myelin	0.859234	2.22045e-16	7.29752e-14
DDR1_cg19591099	MBP_cg08176598	Myelin	0.848412	1.11022e-15	3.05797e-13
DDR1_cg17604312	MBP_cg08176598	Myelin	0.844299	1.9984e-15	5.10896e-13
DDR1_cg05703744	MBP_cg08176598	Myelin	0.841397	3.10862e-15	7.60924e-13
DDR1_cg25655106	MBP_cg08176598	Myelin	0.818739	6.92779e-14	1.21994e-11
DDR1_cg06501109	MBP_cg08176598	Myelin	0.797613	8.75078e-13	1.18405e-10
DDR1_cg06200824	MBP_cg08176598	Myelin	0.762216	3.3527e-11	3.04104e-09
DDR1_cg25655106	MBP_cg08936202	Myelin	0.78697	2.81464e-12	3.33612e-10
DDR1_cg21677258	MBP_cg08936202	Myelin	0.7831	4.23439e-12	4.78013e-10
DDR1_cg07912416	MBP_cg08936202	Myelin	0.772537	1.23923e-11	1.24698e-09
DDR1_cg13218242	MBP_cg08936202	Myelin	0.769311	1.70064e-11	1.66181e-09
DDR1_cg08673763	MBP_cg08936202	Myelin	0.768989	1.75486e-11	1.71109e-09
DDR1_cg05703744	MBP_cg08936202	Myelin	0.767134	2.0997e-11	2.0061e-09
DDR1_cg12669395	MBP_cg08936202	Myelin	0.763199	3.05611e-11	2.80304e-09
DDR1_cg19591099	MBP_cg08936202	Myelin	0.753507	7.4738e-11	6.11653e-09
DDR1_cg12316667	MBP_cg08936202	Myelin	0.747299	1.29753e-10	9.91123e-09
DDR1_cg12669395	MBP_cg10542482	Myelin	-0.747838	1.23762e-10	9.51809e-09
DDR1_cg11676038	MBP_cg10542482	Myelin	-0.750983	9.37148e-11	7.44653e-09
DDR1_cg24727290	MBP_cg10542482	Myelin	-0.752459	8.21259e-11	6.62889e-09
DDR1_cg08951271	MBP_cg10542482	Myelin	-0.75512	6.45892e-11	5.37707e-09
DDR1_cg19591099	MBP_cg10542482	Myelin	-0.760603	3.89915e-11	3.46011e-09
DDR1_cg05703744	MBP_cg10542482	Myelin	-0.780519	5.53446e-12	6.06303e-10
DDR1_cg25655106	MBP_cg10542482	Myelin	-0.790356	1.95488e-12	2.40562e-10
DDR1_cg12316667	MBP_cg10542482	Myelin	-0.81511	1.09246e-13	1.8399e-11
DDR1_cg05703744	MBP_cg11195910	Myelin	0.886147	<2.22E-16	<2.22E-16
DDR1_cg11676038	MBP_cg11195910	Myelin	0.873707	<2.22E-16	<2.22E-16
DDR1_cg07912416	MBP_cg11195910	Myelin	0.855991	4.44089e-16	1.3302e-13
DDR1_cg12316667	MBP_cg11195910	Myelin	0.847605	1.33227e-15	3.54677e-13
DDR1_cg12669395	MBP_cg11195910	Myelin	0.841373	3.10862e-15	7.60924e-13
DDR1_cg06200824	MBP_cg11195910	Myelin	0.837687	5.32907e-15	1.23832e-12
DDR1_cg19591099	MBP_cg11195910	Myelin	0.815836	9.99201e-14	1.6987e-11
DDR1_cg21677258	MBP_cg11195910	Myelin	0.814143	1.23457e-13	2.0524e-11
DDR1_cg13218242	MBP_cg11195910	Myelin	0.810192	2.00728e-13	3.16947e-11
DDR1_cg17604312	MBP_cg11195910	Myelin	0.783583	4.02567e-12	4.57505e-10
DDR1_cg25655106	MBP_cg11195910	Myelin	0.77165	1.35261e-11	1.34802e-09
DDR1_cg27237814	MBP_cg11195910	Myelin	0.754959	6.55418e-11	5.43963e-09
DDR1_cg08673763	MBP_cg11195910	Myelin	0.751169	9.21703e-11	7.33242e-09
DDR1_cg07912416	MBP_cg11772665	Myelin	0.841477	3.10862e-15	7.60924e-13
DDR1_cg21677258	MBP_cg11772665	Myelin	0.814869	1.12799e-13	1.89267e-11
DDR1_cg05703744	MBP_cg11772665	Myelin	0.809547	2.16716e-13	3.39024e-11
DDR1_cg11676038	MBP_cg11772665	Myelin	0.789969	2.03881e-12	2.49755e-10
DDR1_cg13218242	MBP_cg11772665	Myelin	0.762619	3.22791e-11	2.94364e-09
DDR1_cg12316667	MBP_cg11772665	Myelin	0.751492	8.95555e-11	7.14964e-09
DDR1_cg06200824	MBP_cg11772665	Myelin	0.750443	9.83207e-11	7.76461e-09
DDR1_cg21677258	MBP_cg12433779	Myelin	0.857684	2.22045e-16	7.29752e-14
DDR1_cg05703744	MBP_cg12433779	Myelin	0.852766	4.44089e-16	1.3302e-13
DDR1_cg06200824	MBP_cg12433779	Myelin	0.84567	1.77636e-15	4.5759e-13
DDR1_cg07912416	MBP_cg12433779	Myelin	0.844138	1.9984e-15	5.10896e-13
DDR1_cg11676038	MBP_cg12433779	Myelin	0.811216	1.77192e-13	2.83088e-11
DDR1_cg12316667	MBP_cg12433779	Myelin	0.802129	5.22027e-13	7.42756e-11
DDR1_cg06501109	MBP_cg12433779	Myelin	0.759071	4.49569e-11	3.92004e-09
DDR1_cg19591099	MBP_cg12433779	Myelin	0.755281	6.36495e-11	5.3152e-09
DDR1_cg05703744	MBP_cg13141061	Myelin	0.912917	<2.22E-16	<2.22E-16
DDR1_cg11676038	MBP_cg13141061	Myelin	0.87282	<2.22E-16	<2.22E-16
DDR1_cg06200824	MBP_cg13141061	Myelin	0.866231	<2.22E-16	<2.22E-16
DDR1_cg12316667	MBP_cg13141061	Myelin	0.853411	4.44089e-16	1.3302e-13
DDR1_cg07912416	MBP_cg13141061	Myelin	0.849782	8.88178e-16	2.49724e-13
DDR1_cg12669395	MBP_cg13141061	Myelin	0.846977	1.33227e-15	3.54677e-13
DDR1_cg21677258	MBP_cg13141061	Myelin	0.846234	1.33227e-15	3.54677e-13
DDR1_cg19591099	MBP_cg13141061	Myelin	0.837849	5.10703e-15	1.19391e-12
DDR1_cg06501109	MBP_cg13141061	Myelin	0.798016	8.3622e-13	1.13602e-10
DDR1_cg13218242	MBP_cg13141061	Myelin	0.772295	1.26921e-11	1.27477e-09
DDR1_cg17604312	MBP_cg13141061	Myelin	0.767457	2.03544e-11	1.95367e-09
DDR1_cg25655106	MBP_cg13141061	Myelin	0.762216	3.3527e-11	3.04104e-09
DDR1_cg07979747	MBP_cg13141061	Myelin	0.755055	6.4974e-11	5.40744e-09
DDR1_cg05703744	MBP_cg13807269	Myelin	0.901951	<2.22E-16	<2.22E-16
DDR1_cg21677258	MBP_cg13807269	Myelin	0.886954	<2.22E-16	<2.22E-16
DDR1_cg07912416	MBP_cg13807269	Myelin	0.877117	<2.22E-16	<2.22E-16
DDR1_cg11676038	MBP_cg13807269	Myelin	0.852904	4.44089e-16	1.3302e-13
DDR1_cg13218242	MBP_cg13807269	Myelin	0.83801	4.88498e-15	1.14596e-12
DDR1_cg12316667	MBP_cg13807269	Myelin	0.827205	2.26485e-14	4.48461e-12
DDR1_cg06200824	MBP_cg13807269	Myelin	0.822529	4.24105e-14	7.91663e-12
DDR1_cg12669395	MBP_cg13807269	Myelin	0.809483	2.18492e-13	3.41408e-11
DDR1_cg07979747	MBP_cg13807269	Myelin	0.802266	5.13811e-13	7.33768e-11
DDR1_cg19591099	MBP_cg13807269	Myelin	0.800516	6.2883e-13	8.78544e-11
DDR1_cg17604312	MBP_cg13807269	Myelin	0.766892	2.14917e-11	2.0483e-09
DDR1_cg06501109	MBP_cg13807269	Myelin	0.752621	8.09459e-11	6.55909e-09
DDR1_cg11676038	MBP_cg14078587	Myelin	0.877618	<2.22E-16	<2.22E-16
DDR1_cg12316667	MBP_cg14078587	Myelin	0.876391	<2.22E-16	<2.22E-16
DDR1_cg19591099	MBP_cg14078587	Myelin	0.856394	4.44089e-16	1.3302e-13
DDR1_cg17604312	MBP_cg14078587	Myelin	0.850992	6.66134e-16	1.95631e-13
DDR1_cg05703744	MBP_cg14078587	Myelin	0.845267	1.77636e-15	4.5759e-13
DDR1_cg06200824	MBP_cg14078587	Myelin	0.838413	4.88498e-15	1.14596e-12
DDR1_cg13218242	MBP_cg14078587	Myelin	0.828818	1.82077e-14	3.70844e-12
DDR1_cg07912416	MBP_cg14078587	Myelin	0.828657	1.86517e-14	3.79318e-12
DDR1_cg06501109	MBP_cg14078587	Myelin	0.823174	3.90799e-14	7.36608e-12
DDR1_cg12669395	MBP_cg14078587	Myelin	0.806983	2.95097e-13	4.47912e-11
DDR1_cg25655106	MBP_cg14078587	Myelin	0.800597	6.23057e-13	8.71829e-11
DDR1_cg07979747	MBP_cg14078587	Myelin	0.761022	3.74976e-11	3.35062e-09
DDR1_cg21677258	MBP_cg14078587	Myelin	0.759555	4.29856e-11	3.77614e-09
DDR1_cg05703744	MBP_cg14298244	Myelin	0.754878	6.60232e-11	5.46951e-09
DDR1_cg05703744	MBP_cg14946295	Myelin	0.93235	<2.22E-16	<2.22E-16
DDR1_cg11676038	MBP_cg14946295	Myelin	0.902897	<2.22E-16	<2.22E-16
DDR1_cg06200824	MBP_cg14946295	Myelin	0.884051	<2.22E-16	<2.22E-16
DDR1_cg07912416	MBP_cg14946295	Myelin	0.875585	<2.22E-16	<2.22E-16
DDR1_cg12316667	MBP_cg14946295	Myelin	0.853733	4.44089e-16	1.3302e-13
DDR1_cg12669395	MBP_cg14946295	Myelin	0.840204	3.55271e-15	8.5798e-13
DDR1_cg21677258	MBP_cg14946295	Myelin	0.833898	9.10383e-15	1.99546e-12
DDR1_cg19591099	MBP_cg14946295	Myelin	0.819868	5.9952e-14	1.07461e-11
DDR1_cg13218242	MBP_cg14946295	Myelin	0.811724	1.66533e-13	2.68438e-11
DDR1_cg06501109	MBP_cg14946295	Myelin	0.796001	1.04916e-12	1.38766e-10
DDR1_cg17604312	MBP_cg14946295	Myelin	0.795759	1.0778e-12	1.42069e-10
DDR1_cg07979747	MBP_cg14946295	Myelin	0.787873	2.55573e-12	3.05874e-10
DDR1_cg05703744	MBP_cg15495463	Myelin	0.903241	<2.22E-16	<2.22E-16
DDR1_cg06200824	MBP_cg15495463	Myelin	0.885502	<2.22E-16	<2.22E-16
DDR1_cg07912416	MBP_cg15495463	Myelin	0.880987	<2.22E-16	<2.22E-16
DDR1_cg11676038	MBP_cg15495463	Myelin	0.846211	1.33227e-15	3.54677e-13
DDR1_cg12669395	MBP_cg15495463	Myelin	0.839398	3.9968e-15	9.53312e-13
DDR1_cg12316667	MBP_cg15495463	Myelin	0.828818	1.82077e-14	3.70844e-12
DDR1_cg19591099	MBP_cg15495463	Myelin	0.820997	5.17364e-14	9.417e-12
DDR1_cg06501109	MBP_cg15495463	Myelin	0.816239	9.50351e-14	1.6228e-11
DDR1_cg21677258	MBP_cg15495463	Myelin	0.814304	1.21014e-13	2.018e-11
DDR1_cg13218242	MBP_cg15495463	Myelin	0.795517	1.10756e-12	1.45353e-10
DDR1_cg15720085	MBP_cg15495463	Myelin	0.779874	5.91438e-12	6.43233e-10
DDR1_cg25655106	MBP_cg15495463	Myelin	0.751492	8.95555e-11	7.14964e-09
DDR1_cg01598675	MBP_cg15495463	Myelin	0.750675	9.63147e-11	7.63294e-09
DDR1_cg12316667	MBP_cg16305018	Myelin	0.790598	1.90425e-12	2.34974e-10
DDR1_cg12669395	MBP_cg16305018	Myelin	0.76207	3.39897e-11	3.07785e-09
DDR1_cg05703744	MBP_cg16305018	Myelin	0.756652	5.61688e-11	4.76255e-09
DDR1_cg12316667	MBP_cg18892054	Myelin	0.833736	9.32587e-15	2.03424e-12
DDR1_cg11676038	MBP_cg18892054	Myelin	0.804604	3.91021e-13	5.72622e-11
DDR1_cg19591099	MBP_cg18892054	Myelin	0.795114	1.15841e-12	1.51365e-10
DDR1_cg17604312	MBP_cg18892054	Myelin	0.786647	2.91278e-12	3.43739e-10
DDR1_cg06200824	MBP_cg18892054	Myelin	0.784954	3.48543e-12	4.0288e-10
DDR1_cg05703744	MBP_cg18892054	Myelin	0.781245	5.135e-12	5.66442e-10
DDR1_cg15720085	MBP_cg18892054	Myelin	0.745202	1.55762e-10	1.16544e-08
DDR1_cg05703744	MBP_cg21107579	Myelin	0.890582	<2.22E-16	<2.22E-16
DDR1_cg11676038	MBP_cg21107579	Myelin	0.851694	6.66134e-16	1.95631e-13
DDR1_cg07912416	MBP_cg21107579	Myelin	0.839461	3.9968e-15	9.53312e-13
DDR1_cg12669395	MBP_cg21107579	Myelin	0.837987	5.10703e-15	1.19391e-12
DDR1_cg21677258	MBP_cg21107579	Myelin	0.828334	1.95399e-14	3.95004e-12
DDR1_cg12316667	MBP_cg21107579	Myelin	0.819465	6.30607e-14	1.11994e-11
DDR1_cg06200824	MBP_cg21107579	Myelin	0.808418	2.48468e-13	3.82284e-11
DDR1_cg19591099	MBP_cg21107579	Myelin	0.784712	3.57536e-12	4.11692e-10
DDR1_cg16111190	MBP_cg21107579	Myelin	0.763909	2.85745e-11	2.64414e-09
DDR1_cg13218242	MBP_cg21107579	Myelin	0.762861	3.15514e-11	2.88312e-09
DDR1_cg17604312	MBP_cg21107579	Myelin	0.759394	4.36335e-11	3.82313e-09
DDR1_cg07979747	MBP_cg21107579	Myelin	0.747878	1.23324e-10	9.49525e-09
DDR1_cg07912416	MBP_cg22239325	Myelin	0.860506	<2.22E-16	<2.22E-16
DDR1_cg05703744	MBP_cg22239325	Myelin	0.846396	1.33227e-15	3.54677e-13
DDR1_cg06501109	MBP_cg22239325	Myelin	0.846315	1.33227e-15	3.54677e-13
DDR1_cg06200824	MBP_cg22239325	Myelin	0.843574	2.22045e-15	5.62874e-13
DDR1_cg11676038	MBP_cg22239325	Myelin	0.833955	8.88178e-15	1.95154e-12
DDR1_cg21677258	MBP_cg22239325	Myelin	0.829786	1.59872e-14	3.31867e-12
DDR1_cg12316667	MBP_cg22239325	Myelin	0.825754	2.75335e-14	5.38487e-12
DDR1_cg19591099	MBP_cg22239325	Myelin	0.800758	6.11511e-13	8.57002e-11
DDR1_cg13218242	MBP_cg22239325	Myelin	0.795597	1.09757e-12	1.44392e-10
DDR1_cg12669395	MBP_cg22239325	Myelin	0.756909	5.48614e-11	4.66633e-09
DDR1_cg19591099	MBP_cg22258096	Myelin	0.821158	5.06262e-14	9.22734e-12
DDR1_cg05703744	MBP_cg22258096	Myelin	0.819061	6.63913e-14	1.17446e-11
DDR1_cg12669395	MBP_cg22258096	Myelin	0.816336	9.37028e-14	1.6041e-11
DDR1_cg11676038	MBP_cg22258096	Myelin	0.814562	1.1724e-13	1.96231e-11
DDR1_cg12316667	MBP_cg22258096	Myelin	0.764715	2.64682e-11	2.46781e-09
DDR1_cg06200824	MBP_cg22258096	Myelin	0.759474	4.33085e-11	3.8008e-09
DDR1_cg05703744	MBP_cg22391424	Myelin	0.864054	<2.22E-16	<2.22E-16
DDR1_cg11676038	MBP_cg22391424	Myelin	0.808394	2.49134e-13	3.82656e-11
DDR1_cg21677258	MBP_cg22391424	Myelin	0.796162	1.03029e-12	1.36671e-10
DDR1_cg12669395	MBP_cg22391424	Myelin	0.790735	1.87628e-12	2.32051e-10
DDR1_cg12316667	MBP_cg22391424	Myelin	0.779632	6.06315e-12	6.57036e-10
DDR1_cg17604312	MBP_cg22391424	Myelin	0.77931	6.26699e-12	6.76684e-10
DDR1_cg07912416	MBP_cg22391424	Myelin	0.763183	3.06055e-11	2.80521e-09
DDR1_cg06200824	MBP_cg22391424	Myelin	0.755604	6.18088e-11	5.18228e-09
DDR1_cg11676038	MBP_cg23327011	Myelin	0.86774	<2.22E-16	<2.22E-16
DDR1_cg05703744	MBP_cg23327011	Myelin	0.866876	<2.22E-16	<2.22E-16
DDR1_cg12316667	MBP_cg23327011	Myelin	0.833253	9.76996e-15	2.12255e-12
DDR1_cg19591099	MBP_cg23327011	Myelin	0.831318	1.28786e-14	2.71504e-12
DDR1_cg07912416	MBP_cg23327011	Myelin	0.829705	1.62093e-14	3.35703e-12
DDR1_cg21677258	MBP_cg23327011	Myelin	0.807692	2.71116e-13	4.13369e-11
DDR1_cg06200824	MBP_cg23327011	Myelin	0.80358	4.40981e-13	6.3716e-11
DDR1_cg13218242	MBP_cg23327011	Myelin	0.794227	1.27853e-12	1.65463e-10
DDR1_cg17604312	MBP_cg23327011	Myelin	0.774069	1.0643e-11	1.09167e-09
DDR1_cg12669395	MBP_cg23327011	Myelin	0.769569	1.65854e-11	1.6236e-09
DDR1_cg21677258	MBP_cg23975646	Myelin	0.887196	<2.22E-16	<2.22E-16
DDR1_cg05703744	MBP_cg23975646	Myelin	0.872359	<2.22E-16	<2.22E-16
DDR1_cg06200824	MBP_cg23975646	Myelin	0.857281	2.22045e-16	7.29752e-14
DDR1_cg11676038	MBP_cg23975646	Myelin	0.840204	3.55271e-15	8.5798e-13
DDR1_cg07912416	MBP_cg23975646	Myelin	0.825431	2.88658e-14	5.62914e-12
DDR1_cg12316667	MBP_cg23975646	Myelin	0.789228	2.20912e-12	2.68429e-10
DDR1_cg19591099	MBP_cg23975646	Myelin	0.782374	4.56746e-12	5.11132e-10
DDR1_cg13218242	MBP_cg23975646	Myelin	0.761248	3.67115e-11	3.28908e-09
DDR1_cg12669395	MBP_cg23975646	Myelin	0.756305	5.79825e-11	4.90097e-09
DDR1_cg11676038	MBP_cg24274653	Myelin	0.774503	1.01914e-11	1.05132e-09
DDR1_cg12316667	MBP_cg24274653	Myelin	0.76211	3.38614e-11	3.06725e-09
DDR1_cg17604312	MBP_cg24274653	Myelin	0.753039	7.79594e-11	6.34179e-09
DDR1_cg13351860	MBP_cg26457248	Myelin	-0.756813	5.53455e-11	4.69716e-09
DDR1_cg15656686	MBP_cg26457248	Myelin	-0.78447	3.66773e-12	4.21252e-10
DDR1_cg24566261	MBP_cg26457248	Myelin	-0.792453	1.55498e-12	1.96263e-10
DDR1_cg25655106	MBP_cg26457248	Myelin	-0.793743	1.3487e-12	1.73218e-10
DDR1_cg00466425	MBP_cg26457248	Myelin	-0.839381	3.9968e-15	9.53312e-13
DDR1_cg11676038	MBP_cg27328941	Myelin	0.89826	<2.22E-16	<2.22E-16
DDR1_cg05703744	MBP_cg27328941	Myelin	0.891388	<2.22E-16	<2.22E-16
DDR1_cg07912416	MBP_cg27328941	Myelin	0.886389	<2.22E-16	<2.22E-16
DDR1_cg06200824	MBP_cg27328941	Myelin	0.881229	<2.22E-16	<2.22E-16
DDR1_cg21677258	MBP_cg27328941	Myelin	0.856475	4.44089e-16	1.3302e-13
DDR1_cg19591099	MBP_cg27328941	Myelin	0.854459	4.44089e-16	1.3302e-13
DDR1_cg12316667	MBP_cg27328941	Myelin	0.842445	2.66454e-15	6.66085e-13
DDR1_cg12669395	MBP_cg27328941	Myelin	0.834721	7.99361e-15	1.77951e-12
DDR1_cg13218242	MBP_cg27328941	Myelin	0.831237	1.31006e-14	2.7597e-12
DDR1_cg17604312	MBP_cg27328941	Myelin	0.791001	1.82254e-12	2.26129e-10
DDR1_cg25655106	MBP_cg27328941	Myelin	0.782374	4.56746e-12	5.11132e-10
DDR1_cg08673763	MBP_cg27328941	Myelin	0.779713	6.01297e-12	6.52382e-10
DDR1_cg06501109	MBP_cg27328941	Myelin	0.775843	8.91065e-12	9.33444e-10
DDR1_cg07979747	MBP_cg27328941	Myelin	0.765134	2.54334e-11	2.38614e-09
DDR1_cg16111190	MBP_cg27328941	Myelin	0.754959	6.55418e-11	5.43963e-09
DDR1_cg15720085	MBP_cg27328941	Myelin	0.752701	8.03619e-11	6.51763e-09
DDR1_cg08673763	MBP_g23653885	Myelin	-0.746588	1.3807e-10	1.04814e-08
DDR1_cg13218242	MBP_g23653885	Myelin	-0.746629	1.37585e-10	1.04504e-08
DDR1_cg21677258	MBP_g23653885	Myelin	-0.751467	8.97571e-11	7.16362e-09
DDR1_cg24727290	MBP_g23653885	Myelin	-0.759288	4.4063e-11	3.85078e-09
DDR1_cg16111190	MBP_g23653885	Myelin	-0.766384	2.25677e-11	2.14255e-09
DDR1_cg15656686	MBP_g23653885	Myelin	-0.767835	1.96243e-11	1.89165e-09
DDR1_cg06200824	MBP_g23653885	Myelin	-0.775415	9.30189e-12	9.69921e-10
DDR1_cg08951271	MBP_g23653885	Myelin	-0.776463	8.37064e-12	8.80626e-10
DDR1_cg17604312	MBP_g23653885	Myelin	-0.78247	4.52172e-12	5.07483e-10
DDR1_cg19591099	MBP_g23653885	Myelin	-0.794686	1.21503e-12	1.58229e-10
DDR1_cg06501109	MBP_g23653885	Myelin	-0.81428	1.21236e-13	2.02046e-11
DDR1_cg11676038	MBP_g23653885	Myelin	-0.817018	8.61533e-14	1.48804e-11
DDR1_cg27237814	MBP_g23653885	Myelin	-0.817264	8.34888e-14	1.44479e-11
DDR1_cg00466425	MBP_g23653885	Myelin	-0.821134	5.08482e-14	9.26157e-12
DDR1_cg25655106	MBP_g23653885	Myelin	-0.861451	0	0
DDR1_cg05703744	MBP_g23653885	Myelin	-0.870684	0	0
DDR1_cg12316667	MBP_g23653885	Myelin	-0.886488	0	0
DDR1_cg12669395	MBP_g23653885	Myelin	-0.910858	0	0
DDR1_cg07908039	OLIG2_cg17013986	Myelin	-0.752474	8.20144e-11	6.62889e-09
DDR1_cg24566261	OLIG2_cg17013986	Myelin	-0.766787	2.17106e-11	2.06625e-09
DDR1_cg05703744	SOX10_cg05447556	Myelin	0.914127	<2.22E-16	<2.22E-16
DDR1_cg11676038	SOX10_cg05447556	Myelin	0.910678	<2.22E-16	<2.22E-16
DDR1_cg06200824	SOX10_cg05447556	Myelin	0.867683	<2.22E-16	<2.22E-16
DDR1_cg12316667	SOX10_cg05447556	Myelin	0.858168	2.22045e-16	7.29752e-14
DDR1_cg19591099	SOX10_cg05447556	Myelin	0.855185	4.44089e-16	1.3302e-13
DDR1_cg07912416	SOX10_cg05447556	Myelin	0.853008	4.44089e-16	1.3302e-13
DDR1_cg21677258	SOX10_cg05447556	Myelin	0.845267	1.77636e-15	4.5759e-13
DDR1_cg12669395	SOX10_cg05447556	Myelin	0.819602	6.19504e-14	1.10384e-11
DDR1_cg13218242	SOX10_cg05447556	Myelin	0.806322	3.193e-13	4.79802e-11
DDR1_cg17604312	SOX10_cg05447556	Myelin	0.784873	3.51519e-12	4.05626e-10
DDR1_cg06501109	SOX10_cg05447556	Myelin	0.779955	5.86553e-12	6.39206e-10
DDR1_cg19591099	SOX10_cg05766881	Myelin	0.89663	<2.22E-16	<2.22E-16
DDR1_cg11676038	SOX10_cg05766881	Myelin	0.892052	<2.22E-16	<2.22E-16
DDR1_cg05703744	SOX10_cg05766881	Myelin	0.890985	<2.22E-16	<2.22E-16
DDR1_cg06200824	SOX10_cg05766881	Myelin	0.883164	<2.22E-16	<2.22E-16
DDR1_cg12669395	SOX10_cg05766881	Myelin	0.865039	<2.22E-16	<2.22E-16
DDR1_cg21677258	SOX10_cg05766881	Myelin	0.864377	<2.22E-16	<2.22E-16
DDR1_cg12316667	SOX10_cg05766881	Myelin	0.848331	1.11022e-15	3.05797e-13
DDR1_cg25655106	SOX10_cg05766881	Myelin	0.784793	3.54516e-12	4.08388e-10
DDR1_cg07912416	SOX10_cg05766881	Myelin	0.782293	4.60587e-12	5.15005e-10
DDR1_cg06501109	SOX10_cg05766881	Myelin	0.779874	5.91438e-12	6.43233e-10
DDR1_cg01598675	SOX10_cg05766881	Myelin	0.760634	3.88802e-11	3.45704e-09
DDR1_cg17604312	SOX10_cg05766881	Myelin	0.759555	4.29856e-11	3.77614e-09
DDR1_cg13218242	SOX10_cg05766881	Myelin	0.747863	1.23488e-10	9.49972e-09
DDR1_cg06200824	SOX10_cg10933281	Myelin	0.874715	<2.22E-16	<2.22E-16
DDR1_cg05703744	SOX10_cg10933281	Myelin	0.872498	<2.22E-16	<2.22E-16
DDR1_cg11676038	SOX10_cg10933281	Myelin	0.87187	<2.22E-16	<2.22E-16
DDR1_cg21677258	SOX10_cg10933281	Myelin	0.86891	<2.22E-16	<2.22E-16
DDR1_cg07912416	SOX10_cg10933281	Myelin	0.859435	2.22045e-16	7.29752e-14
DDR1_cg19591099	SOX10_cg10933281	Myelin	0.856613	4.44089e-16	1.3302e-13
DDR1_cg12316667	SOX10_cg10933281	Myelin	0.832503	1.11022e-14	2.37198e-12
DDR1_cg01598675	SOX10_cg10933281	Myelin	0.793065	1.4535e-12	1.85009e-10
DDR1_cg13218242	SOX10_cg10933281	Myelin	0.788558	2.37432e-12	2.85934e-10
DDR1_cg06501109	SOX10_cg10933281	Myelin	0.776987	7.93854e-12	8.40069e-10
DDR1_cg12669395	SOX10_cg10933281	Myelin	0.774503	1.01914e-11	1.05132e-09
DDR1_cg15720085	SOX10_cg10933281	Myelin	0.7557	6.12714e-11	5.1484e-09
DDR1_cg05703744	SOX10_cg11864127	Myelin	0.929205	<2.22E-16	<2.22E-16
DDR1_cg11676038	SOX10_cg11864127	Myelin	0.901042	<2.22E-16	<2.22E-16
DDR1_cg21677258	SOX10_cg11864127	Myelin	0.865747	<2.22E-16	<2.22E-16
DDR1_cg12316667	SOX10_cg11864127	Myelin	0.853733	4.44089e-16	1.3302e-13
DDR1_cg12669395	SOX10_cg11864127	Myelin	0.849799	8.88178e-16	2.49724e-13
DDR1_cg07912416	SOX10_cg11864127	Myelin	0.84954	8.88178e-16	2.49724e-13
DDR1_cg19591099	SOX10_cg11864127	Myelin	0.847283	1.33227e-15	3.54677e-13
DDR1_cg08673763	SOX10_cg11864127	Myelin	0.81374	1.29674e-13	2.14653e-11
DDR1_cg13218242	SOX10_cg11864127	Myelin	0.811321	1.74749e-13	2.79847e-11
DDR1_cg06200824	SOX10_cg11864127	Myelin	0.808902	2.34479e-13	3.63449e-11
DDR1_cg06501109	SOX10_cg11864127	Myelin	0.800839	6.05738e-13	8.49352e-11
DDR1_cg17604312	SOX10_cg11864127	Myelin	0.794065	1.30163e-12	1.67969e-10
DDR1_cg25655106	SOX10_cg11864127	Myelin	0.774794	9.89875e-12	1.02583e-09
DDR1_cg07979747	SOX10_cg11864127	Myelin	0.74679	1.35661e-10	1.0313e-08
DDR1_cg08951271	SOX10_cg11864127	Myelin	0.745041	1.57955e-10	1.18152e-08
DDR1_cg25655106	SOX10_cg15856662	Myelin	0.834543	8.21565e-15	1.81996e-12
DDR1_cg08673763	SOX10_cg15856662	Myelin	0.821642	4.75175e-14	8.73728e-12
DDR1_cg07803420	SOX10_cg15856662	Myelin	0.810998	1.81855e-13	2.89171e-11
DDR1_cg12669395	SOX10_cg15856662	Myelin	0.805451	3.53939e-13	5.25431e-11
DDR1_cg16111190	SOX10_cg15856662	Myelin	0.803258	4.57856e-13	6.60837e-11
DDR1_cg05703744	SOX10_cg15856662	Myelin	0.796565	9.84768e-13	1.31212e-10
DDR1_cg08951271	SOX10_cg15856662	Myelin	0.785518	3.2836e-12	3.81506e-10
DDR1_cg19591099	SOX10_cg15856662	Myelin	0.77802	7.14895e-12	7.63081e-10
DDR1_cg24727290	SOX10_cg15856662	Myelin	0.763022	3.10751e-11	2.8444e-09
DDR1_cg11676038	SOX10_cg15856662	Myelin	0.759046	4.50613e-11	3.92787e-09
DDR1_cg06200824	SOX10_cg15856662	Myelin	0.750847	9.48575e-11	7.52406e-09
DDR1_cg05703744	SOX10_cg19228755	Myelin	0.871634	<2.22E-16	<2.22E-16
DDR1_cg11676038	SOX10_cg19228755	Myelin	0.869393	<2.22E-16	<2.22E-16
DDR1_cg21677258	SOX10_cg19228755	Myelin	0.848331	1.11022e-15	3.05797e-13
DDR1_cg12316667	SOX10_cg19228755	Myelin	0.844944	1.77636e-15	4.5759e-13
DDR1_cg07912416	SOX10_cg19228755	Myelin	0.836559	6.21725e-15	1.42754e-12
DDR1_cg13218242	SOX10_cg19228755	Myelin	0.807531	2.76223e-13	4.20208e-11
DDR1_cg17604312	SOX10_cg19228755	Myelin	0.80487	3.78808e-13	5.56243e-11
DDR1_cg06200824	SOX10_cg19228755	Myelin	0.79979	6.83231e-13	9.47694e-11
DDR1_cg12669395	SOX10_cg19228755	Myelin	0.793396	1.40155e-12	1.79154e-10
DDR1_cg19591099	SOX10_cg19228755	Myelin	0.792856	1.4877e-12	1.89183e-10
DDR1_cg07979747	SOX10_cg19228755	Myelin	0.753724	7.32907e-11	6.00899e-09
DDR1_cg05703744	SOX10_cg19257200	Myelin	0.934527	<2.22E-16	<2.22E-16
DDR1_cg11676038	SOX10_cg19257200	Myelin	0.92241	<2.22E-16	<2.22E-16
DDR1_cg21677258	SOX10_cg19257200	Myelin	0.886792	<2.22E-16	<2.22E-16
DDR1_cg07912416	SOX10_cg19257200	Myelin	0.884938	<2.22E-16	<2.22E-16
DDR1_cg12669395	SOX10_cg19257200	Myelin	0.870845	<2.22E-16	<2.22E-16
DDR1_cg12316667	SOX10_cg19257200	Myelin	0.868811	<2.22E-16	<2.22E-16
DDR1_cg19591099	SOX10_cg19257200	Myelin	0.867763	<2.22E-16	<2.22E-16
DDR1_cg06200824	SOX10_cg19257200	Myelin	0.867279	<2.22E-16	<2.22E-16
DDR1_cg17604312	SOX10_cg19257200	Myelin	0.835833	6.88338e-15	1.56719e-12
DDR1_cg13218242	SOX10_cg19257200	Myelin	0.824786	3.15303e-14	6.10038e-12
DDR1_cg06501109	SOX10_cg19257200	Myelin	0.797371	8.99281e-13	1.21255e-10
DDR1_cg25655106	SOX10_cg19257200	Myelin	0.768908	1.76865e-11	1.72205e-09
DDR1_cg07979747	SOX10_cg19257200	Myelin	0.768521	1.83646e-11	1.78422e-09
DDR1_cg01598675	SOX10_cg19257200	Myelin	0.753054	7.78531e-11	6.33695e-09
DDR1_cg08673763	SOX10_cg19257200	Myelin	0.750524	9.76186e-11	7.72269e-09
DDR1_cg05703744	SOX10_cg20754324	Myelin	0.905822	<2.22E-16	<2.22E-16
DDR1_cg06200824	SOX10_cg20754324	Myelin	0.901387	<2.22E-16	<2.22E-16
DDR1_cg07912416	SOX10_cg20754324	Myelin	0.8801	<2.22E-16	<2.22E-16
DDR1_cg12316667	SOX10_cg20754324	Myelin	0.878971	<2.22E-16	<2.22E-16
DDR1_cg11676038	SOX10_cg20754324	Myelin	0.877094	<2.22E-16	<2.22E-16
DDR1_cg21677258	SOX10_cg20754324	Myelin	0.846073	1.55431e-15	4.10958e-13
DDR1_cg13218242	SOX10_cg20754324	Myelin	0.841477	3.10862e-15	7.60924e-13
DDR1_cg12669395	SOX10_cg20754324	Myelin	0.838228	4.88498e-15	1.14596e-12
DDR1_cg19591099	SOX10_cg20754324	Myelin	0.833978	8.88178e-15	1.95154e-12
DDR1_cg17604312	SOX10_cg20754324	Myelin	0.803016	4.70735e-13	6.76178e-11
DDR1_cg25655106	SOX10_cg20754324	Myelin	0.788179	2.47291e-12	2.96749e-10
DDR1_cg06501109	SOX10_cg20754324	Myelin	0.786728	2.88791e-12	3.41102e-10
DDR1_cg01598675	SOX10_cg20754324	Myelin	0.783937	3.8789e-12	4.42499e-10
DDR1_cg15720085	SOX10_cg20754324	Myelin	0.776246	8.55582e-12	8.98361e-10
DDR1_cg08673763	SOX10_cg20754324	Myelin	0.762216	3.3527e-11	3.04104e-09
DDR1_cg25655106	SOX10_cg23109891	Myelin	0.849057	8.88178e-16	2.49724e-13
DDR1_cg08951271	SOX10_cg23109891	Myelin	0.833817	9.32587e-15	2.03424e-12
DDR1_cg12669395	SOX10_cg23109891	Myelin	0.827504	2.17604e-14	4.3214e-12
DDR1_cg11676038	SOX10_cg23109891	Myelin	0.800331	6.42153e-13	8.94846e-11
DDR1_cg12316667	SOX10_cg23109891	Myelin	0.799871	6.77014e-13	9.40035e-11
DDR1_cg07803420	SOX10_cg23109891	Myelin	0.798097	8.28448e-13	1.12602e-10
DDR1_cg17604312	SOX10_cg23109891	Myelin	0.796726	9.67226e-13	1.29065e-10
DDR1_cg08673763	SOX10_cg23109891	Myelin	0.786405	2.98872e-12	3.51474e-10
DDR1_cg13218242	SOX10_cg23109891	Myelin	0.781406	5.04996e-12	5.58427e-10
DDR1_cg05703744	SOX10_cg23109891	Myelin	0.779632	6.06315e-12	6.57036e-10
DDR1_cg13329862	SOX10_cg23109891	Myelin	0.776407	8.41793e-12	8.85258e-10
DDR1_cg19591099	SOX10_cg23109891	Myelin	0.764554	2.68772e-11	2.50077e-09
DDR1_cg24727290	SOX10_cg23109891	Myelin	0.763425	2.99138e-11	2.75207e-09
DDR1_cg27237814	SOX10_cg23109891	Myelin	0.745928	1.46246e-10	1.10124e-08
DDR1_cg16111190	SOX10_cg23109891	Myelin	0.745444	1.52527e-10	1.14218e-08
DDR1_cg25655106	SOX10_cg25036707	Myelin	0.847121	1.33227e-15	3.54677e-13
DDR1_cg07803420	SOX10_cg25036707	Myelin	0.832285	1.13243e-14	2.41751e-12
DDR1_cg12669395	SOX10_cg25036707	Myelin	0.828794	1.82077e-14	3.70844e-12
DDR1_cg05703744	SOX10_cg25036707	Myelin	0.824625	3.21965e-14	6.21148e-12
DDR1_cg08673763	SOX10_cg25036707	Myelin	0.822609	4.19664e-14	7.84456e-12
DDR1_cg16111190	SOX10_cg25036707	Myelin	0.821964	4.57412e-14	8.46822e-12
DDR1_cg08951271	SOX10_cg25036707	Myelin	0.821561	4.79616e-14	8.80099e-12
DDR1_cg24727290	SOX10_cg25036707	Myelin	0.812208	1.56763e-13	2.54357e-11
DDR1_cg19591099	SOX10_cg25036707	Myelin	0.801887	5.36904e-13	7.60722e-11
DDR1_cg11676038	SOX10_cg25036707	Myelin	0.799524	7.04325e-13	9.72465e-11
DDR1_cg13329862	SOX10_cg25036707	Myelin	0.799065	7.42295e-13	1.0202e-10
DDR1_cg06200824	SOX10_cg25036707	Myelin	0.779552	6.11333e-12	6.61678e-10
DDR1_cg12316667	SOX10_cg25036707	Myelin	0.752379	8.27223e-11	6.67106e-09
DDR1_cg07912416	SOX10_cg25036707	Myelin	0.74996	1.02635e-10	8.06527e-09
DDR1_cg13218242	SOX10_cg25036707	Myelin	0.747218	1.30672e-10	9.97017e-09
DDR1_cg21677258	SOX10_cg25036707	Myelin	0.745928	1.46246e-10	1.10124e-08
DDR1_cg06200824	SOX10_cg25625951	Myelin	0.903139	<2.22E-16	<2.22E-16
DDR1_cg11676038	SOX10_cg25625951	Myelin	0.88707	<2.22E-16	<2.22E-16
DDR1_cg05703744	SOX10_cg25625951	Myelin	0.885278	<2.22E-16	<2.22E-16
DDR1_cg12316667	SOX10_cg25625951	Myelin	0.863749	<2.22E-16	<2.22E-16
DDR1_cg19591099	SOX10_cg25625951	Myelin	0.861411	<2.22E-16	<2.22E-16
DDR1_cg12669395	SOX10_cg25625951	Myelin	0.85151	6.66134e-16	1.95631e-13
DDR1_cg07912416	SOX10_cg25625951	Myelin	0.839317	4.21885e-15	1.00274e-12
DDR1_cg21677258	SOX10_cg25625951	Myelin	0.808837	2.36255e-13	3.65783e-11
DDR1_cg15720085	SOX10_cg25625951	Myelin	0.76469	2.6531e-11	2.47196e-09
DDR1_cg13218242	SOX10_cg25625951	Myelin	0.761828	3.47704e-11	3.13595e-09
DDR1_cg01598675	SOX10_cg25625951	Myelin	0.760689	3.86788e-11	3.44437e-09
DDR1_cg17604312	SOX10_cg25625951	Myelin	0.760014	4.11919e-11	3.63273e-09
DDR1_cg06501109	SOX10_cg25625951	Myelin	0.75441	6.8888e-11	5.67901e-09
DDR1_cg25655106	SOX10_cg25625951	Myelin	0.749168	1.10079e-10	8.60277e-09
aSpearman correlation coefficient.
bPost hoc Benjamini & Hochberg method for multiple testing correction.
Results sorted in alphabetical order by myelin gene names.
Abbreviations: 5-mC: 5-methylcytosine; FC: Frontal cortex; NeuN+: Neuronal nuclei.

## Sheet: TS10_TFBS
Table S10. Transcription factor-binding regions matching with DDR1 CpG loci differentially methylated in OC samples from patients with BD
Acronyma	Name	Functionb
ASH2L	ASH2 Like, Histone Lysine Methyltransferase Complex Subunit	Transcriptional regulator. Component or associated component of some histone methyltransferase complexes which regulates transcription through recruitment of those complexes to gene promoters.
ATF3	Activating Transcription Factor 3	This protein binds the cAMP response element (CRE) (consensus: 5'-GTGACGT[AC][AG]-3'), a sequence present in many viral and cellular promoters. Represses transcription from promoters with ATF sites. It may repress transcription by stabilizing the binding of inhibitory cofactors at the promoter.
CTCF	CCCCTC-Binding Factor	Member of the BORIS + CTCF gene family and encodes a transcriptional regulatory protein with 11 highly conserved zinc finger domains. Depending on the context this protein can bind to a histone acetyltransferase (HAT)-containing complex and function as a transcriptional activator or bind to a histone deacetylase-containing complex (HDAC) and function as a transcriptional repressor. If the protein…
E2F1	E2F Transcription Factor	Member of the E2F family of transcription factors. The E2F family plays a crucial role in the control of cell cycle. It can mediate both cell proliferation and p53-dependent/independent apoptosis.
EGR1	Early Growth Response 1	Transcriptional regulator involved in differentiation and mitogenesis. Recognizes and binds to the DNA sequence 5'-GCG(T/G)GGGCG-3'(EGR-site) in the promoter region of target genes. Binds double-stranded target DNA, irrespective of the cytosine methylation status. Plays a role in the regulation of cell survival, proliferation and cell death.
FOS	Fos Proto-Oncogene, AP-1 Transcription Factor Subunit	DNA-binding transcription factor activity and transcription factor binding. Regulator of cell proliferation, differentiation, and transformation.
FOSL1	FOS Like 1, AP-1 Transcription Factor Subunit	The Fos gene family consists of 4 members: FOS, FOSB, FOSL1, and FOSL2. These genes encode leucine zipper proteins that can dimerize with proteins of the JUN family, thereby forming the transcription factor complex AP-1. As such, the FOS proteins have been implicated as regulators of cell proliferation, differentiation, and transformation. Has a critical function in regulating the development of …
FOSL2	FOS Like 2, AP-1 Transcription Factor Subunit
HDAC2	Histone Deacetylase 2	Deacetylation of lysine residues at the N-terminal regions of core histones (H2A, H2B, H3 and H4). Thus, it plays an important role in transcriptional regulation, cell cycle progression and developmental events.
JUN	Jun Proto-Oncogene, AP-1 Transcription Factor Subunit	Functional component of the AP1 transcription factor complex that recognizes and binds to the enhancer heptamer motif 5'-TGA[CG]TCA-3'. Among its related pathways are oxytocin signaling pathway and CCR5 pathway in macrophages.
JUND	JunD Proto-Oncogene, AP-1 Transcription Factor Subunit	Functional component of the AP1 transcription factor complex. This protein has been proposed to protect cells from p53-dependent senescence and apoptosis.
MCM2	Minichromosome Maintenance Complex Component 2	The protein encoded by this gene is one of the highly conserved mini-chromosome maintenance proteins (MCM) that are involved in the initiation of eukaryotic genome replication. The hexameric protein complex formed by MCM proteins is a key component of the pre-replication complex (pre_RC) and may be involved in the formation of replication forks and in the recruitment of other DNA replication rela…
POLR2A	RNA Polymerase II Subunit A	DNA-directed 5'-3' RNA polymerase activity. Encodes the largest subunit of RNA polymerase II, the polymerase responsible for synthesizing messenger RNA in eukaryotes.
SAP30	Sin3A Associated Protein 30	The protein encoded by this gene is a component of the histone deacetylase complex, which includes SIN3, SAP18, HDAC1, HDAC2, RbAp46, RbAp48, and other polypeptides. Regulator of eukaryotic gene expression.
SIN3A	SIN3 Transcription Regulator Family Member A	DNA-binding transcription factor activity. Transcriptional repressor. Regulator of cell cycle progression. Required for cortical neuron differentiation and callosal axon elongation.
TFAP2C	Transcription Factor AP-2 Gamma	Sequence-specific (5'-GCCNNNGGC-3') DNA-binding protein that regulates transcription of selected genes. The protein can act as either a homodimer or heterodimer with other family members and is induced during retinoic acid-mediated differentiation.
Data from Transcription Factor ChIP-seq Clusters (161 factors. The signal intensity corresponds to the maximum signal strength observed in any cell type contributing to the cluster) from ENCODE project and The Open Regulatory Annotation database (ORegAnno).
aTranscription factor (gene name) that bind to the DDR1 GpG sequence.
bInformation adapted from Gene Cards.
